# Supplementary material for: Biocatalytic enantioselective hydroaminations enabling synthesis of N-arylalkyl-substituted l-aspartic acids
Source: Royal Society of Chemistry journal article supplement (doi:10.1039/d1ob00748c), 2021-01-01
Supplement: d1ob00748c1.pdf [file d1ob00748c1.pdf]

## SUPPORTING INFORMATION

# Biocatalytic Enantioselective Hydroaminations Enabling Synthesis of *N*-Arylalkyl-Substituted L-Aspartic Acids

Mohammad Z. Abidin<sup>1,2</sup>, Thangavelu Saravanan<sup>\*1,3</sup>, Laura Bothof<sup>1</sup>, Pieter G. Tepper<sup>1</sup>,  
Andy-Mark W.H. Thunnissen<sup>4</sup>, and Gerrit J. Poelarends<sup>\*1</sup>

<sup>1</sup>Department of Chemical and Pharmaceutical Biology, Groningen Research Institute of Pharmacy, University of Groningen, Antonius Deusinglaan 1, 9713 AV Groningen, The Netherlands.

<sup>2</sup>Department of Animal Product Technology, Faculty of Animal Science, Gadjah Mada University, Bulaksumur, Yogyakarta, 55281, Indonesia.

<sup>3</sup>School of Chemistry, University of Hyderabad, P.O. Central University, Hyderabad-500046, India. E-mail: tsaravanan@uohyd.ac.in

<sup>4</sup>Molecular Enzymology Group, Groningen Institute of Biomolecular Sciences and Biotechnology, University of Groningen, Nijenborgh 4, 9747 AG, Groningen, The Netherlands.

\*Address correspondence to Prof. Dr. Gerrit J. Poelarends. Tel: +31-50-3633354; Fax: +31-50-3633000; E-mail: [g.j.poelarends@rug.nl](mailto:g.j.poelarends@rug.nl).

## Table of contents

1. General information
2. Detailed experimental procedures
  - 2.1 Analytical scale synthesis
  - 2.2 Conversion analysis by  $^1\text{H}$  NMR
  - 2.3 Enzymatic synthesis of *N*-arylalkyl-substituted L-aspartic acids
  - 2.4 Chemical synthesis of *N*-arylalkyl-substituted D- and L-aspartic acids
3. NMR spectra
  - 3.1  $^1\text{H}$  and  $^{13}\text{C}$  NMR spectra of enzymatically obtained *N*-arylalkyl-substituted *L*-aspartic acids
  - 3.2  $^1\text{H}$  and  $^{13}\text{C}$  NMR spectra of chemically obtained *N*-arylalkyl-substituted D- and L-aspartic acids
4. LC-HRMS analysis
5. Chiral HPLC analysis
6. Additional figures
7. Supplementary references

## 1. General information

2-Phenethylamine (**2a**), 4-phenylbutylamine (**2b**), 4-fluorobenzylamine (**2c**), 4-chlorobenzylamine (**2d**), 4-nitrobenzylamine (**2e**), *p*-xylylenediamine (**2f**), 4-methylphenethylamine (**2g**), 4-hydroxyphenethylamine (**2h**), 4-fluorophenethylamine (**2j**), 3-fluorophenethylamine (**2k**), 2-fluorophenethylamine (**2l**), 4-chlorophenethylamine (**2m**), *rac*- $\beta$ -methylphenethylamine (**2n**), *rac*-2-amino-1-phenylethanol (**2o**), tryptamine (**2p**), *N*-methyl-phenethylamine (**2q**), 3-methylbenzylamine (**2r**), 3-chlorobenzylamine (**2s**), 3-methylphenethylamine (**2t**), and 3-chlorophenethylamine (**2u**) were purchased from Sigma-Aldrich Chemical Co. (St. Louis, MO). The compound 3-hydroxyphenethylamine (**2i**) was purchased from AURUM Pharmatech (USA). Solvents were purchased from Biosolve (Valkenswaard, The Netherlands) or Sigma-Aldrich Chemical Co. Ingredients for buffers and media were obtained from Duchefa Biochemie (Haarlem, The Netherlands) or Merck (Darmstadt, Germany). Dowex<sup>®</sup> 50W X8 resin (100-200 mesh) was purchased from Sigma-Aldrich Chemical Co. Ni sepharose 6 fast flow resin and HiLoad<sup>®</sup> 16/600 Superdex<sup>®</sup> 200 pg prep grade column were purchased from GE Healthcare Bio-Sciences AB (Uppsala, Sweden).

Proteins were analyzed by sodium dodecyl sulfate-polyacrylamide gel electrophoresis (SDS-PAGE) under denaturing conditions on precast gels (NuPAGE<sup>™</sup> 12% Bis-Tris protein gels). The gels were stained with Instant Blue. NMR analysis was performed on a Bruker 500 MHz NMR machine at the Drug Design Laboratory of the University of Groningen. Chemical shifts ( $\delta$ ) are reported in parts per million (ppm). Electrospray ionization orbitrap high-resolution mass spectrometry (HRMS) was performed by the Mass Spectrometry core facility of the University of Groningen.

For calculation of the specific activity, one unit (nmol/min) was defined as the amount of biocatalyst required for the hydroamination of 1 nmol fumaric acid per minute (50 mM amine and 10 mM fumarate in 20 mM NaH<sub>2</sub>PO<sub>4</sub>-NaOH buffer, pH 8.5).

## 2. Detailed experimental procedures

The EDDS lyase enzyme was overexpressed and purified to homogeneity by following previously described protocols.<sup>1,2</sup>

## 2.1 Analytical scale synthesis

The initial reaction mixture (2.5 mL) consisted of fumarate (sodium salt, 10 mM) and an amine or amino acid (**2a-u**; 50 mM) in NaH<sub>2</sub>PO<sub>4</sub>-NaOH buffer (50 mM; pH 8.5) and the pH of the reaction mixture was adjusted to pH 8.5. The enzymatic reaction was started by addition of freshly purified EDDS lyase (15 μM, 1.3 U based on ethylenediamine addition to fumarate) and the final volume of the reaction mixture was adjusted to 3 mL with the same buffer. The reaction mixture was incubated at room temperature for 24 h (except for **2c**, **2e**, **2f**, and **2n**; 48h). The enzyme was inactivated by heating at 70 °C for 10 min. The reaction mixture was filtered to remove the precipitated enzyme, and the filtrate was evaporated under vacuum. The resulting residue was dissolved in D<sub>2</sub>O (0.5 mL) and analyzed by <sup>1</sup>H NMR spectroscopy. The conversion was estimated by comparing the signals of fumaric acid (**1**: olefinic protons) and corresponding products (**2**: methylene protons or **1**: methine proton) in <sup>1</sup>H NMR spectra as shown in Figures **S1-S21**.

## 2.2 Conversion analysis by <sup>1</sup>H NMR

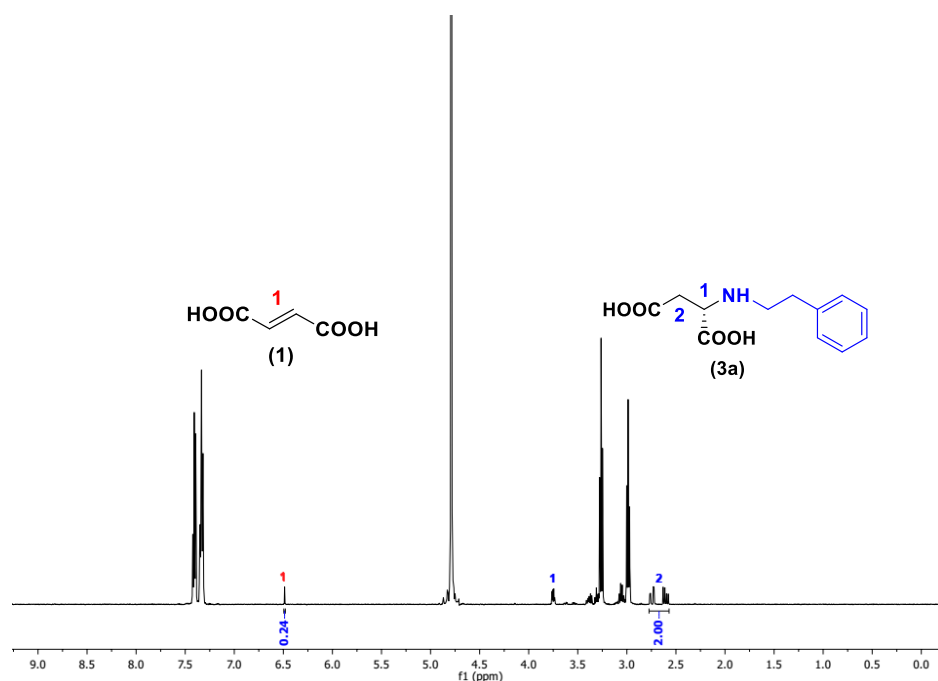

**Figure S1.** <sup>1</sup>H NMR spectrum monitoring the EDDS lyase catalyzed asymmetric addition of **2a** to fumarate (**1**). The conversion of substrates into corresponding product (**3a**) is 89%.

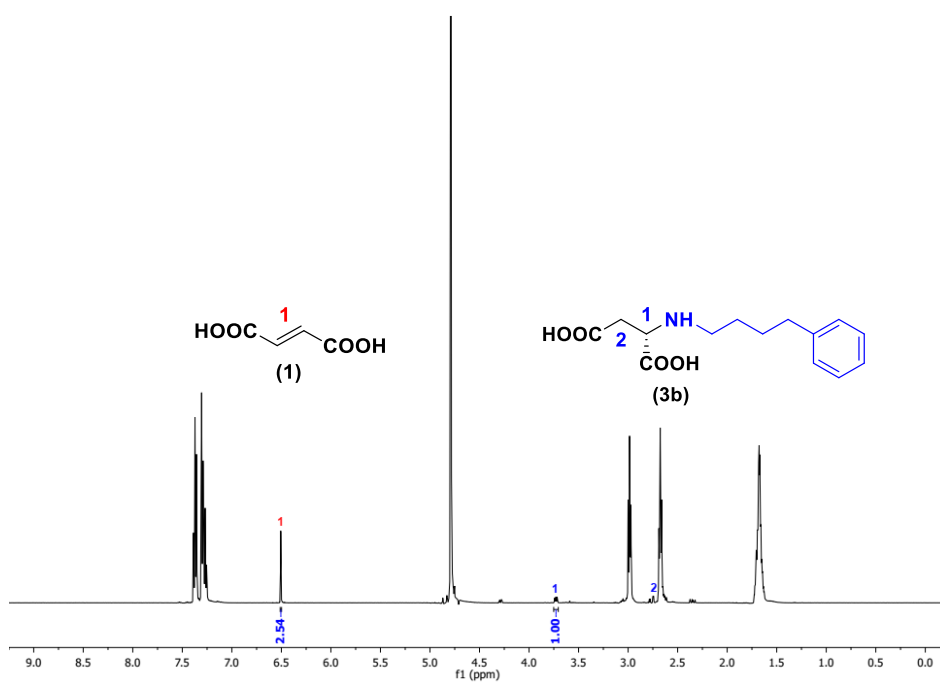

**Figure S2.**  $^1\text{H}$  NMR spectra monitoring the EDDS lyase catalyzed asymmetric addition of **2b** to fumarate (**1**). The conversion of substrates into corresponding product (**3b**) is 44%.

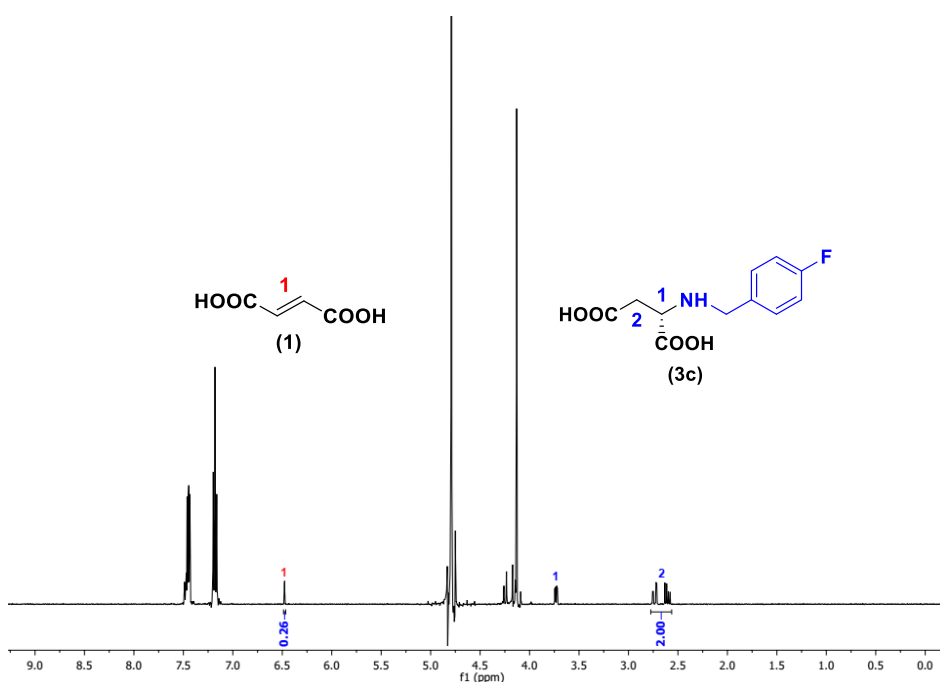

**Figure S3.**  $^1\text{H}$  NMR spectra monitoring the EDDS lyase catalyzed asymmetric addition of **2c** to fumarate (**1**). The conversion of substrates into corresponding product (**3c**) is 88%.

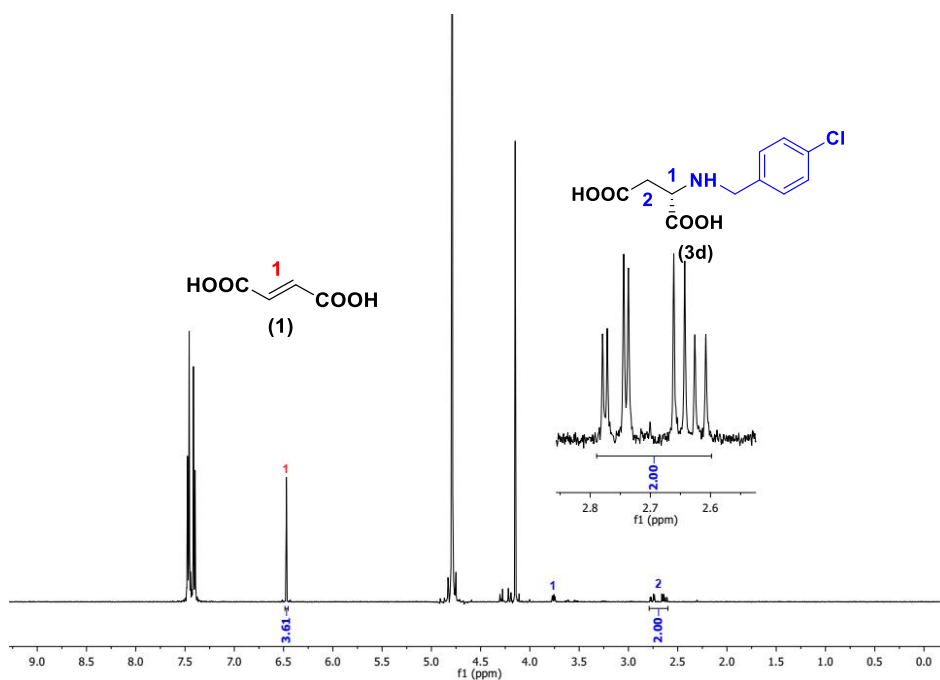

**Figure S4.**  $^1\text{H}$  NMR spectra monitoring the EDDS lyase catalyzed asymmetric addition of **2d** to fumarate (**1**). The conversion of substrates into corresponding product (**3d**) is 36%.

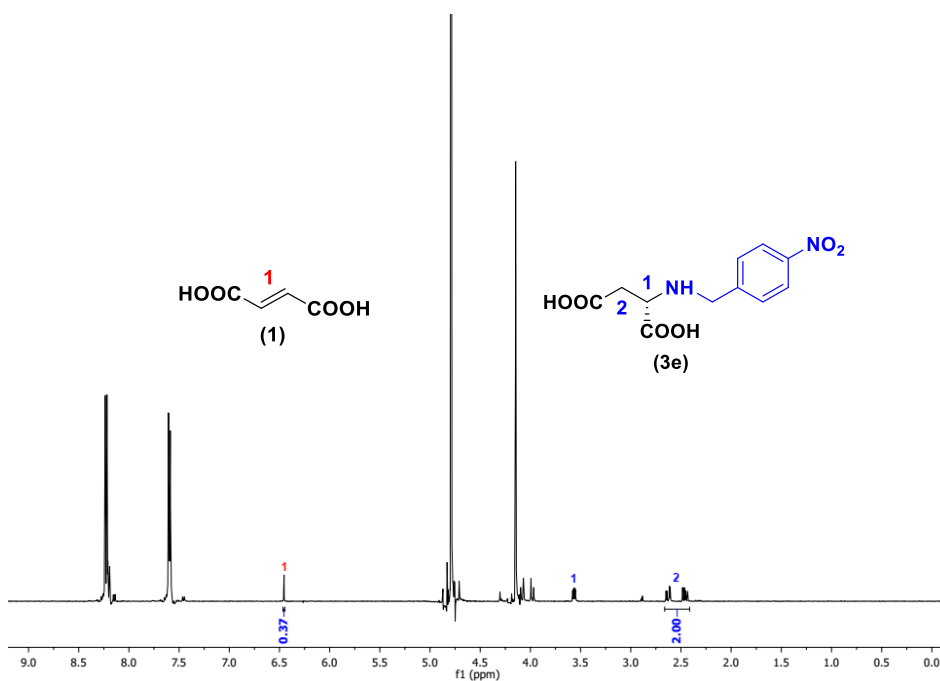

**Figure S5.**  $^1\text{H}$  NMR spectra monitoring the EDDS lyase catalyzed asymmetric addition of **2e** to fumarate (**1**). The conversion of substrates into corresponding product (**3e**) is 84%.

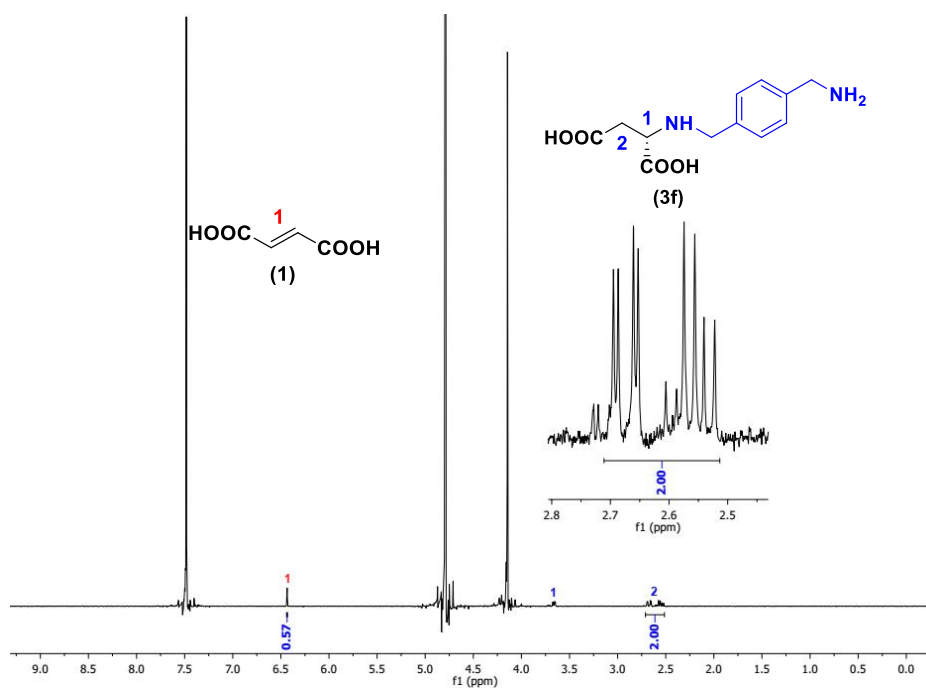

**Figure S6.** <sup>1</sup>H NMR spectra monitoring the EDDS lyase catalyzed asymmetric addition of **2f** to fumarate (**1**). The conversion of substrates into corresponding product (**3f**) is 78%.

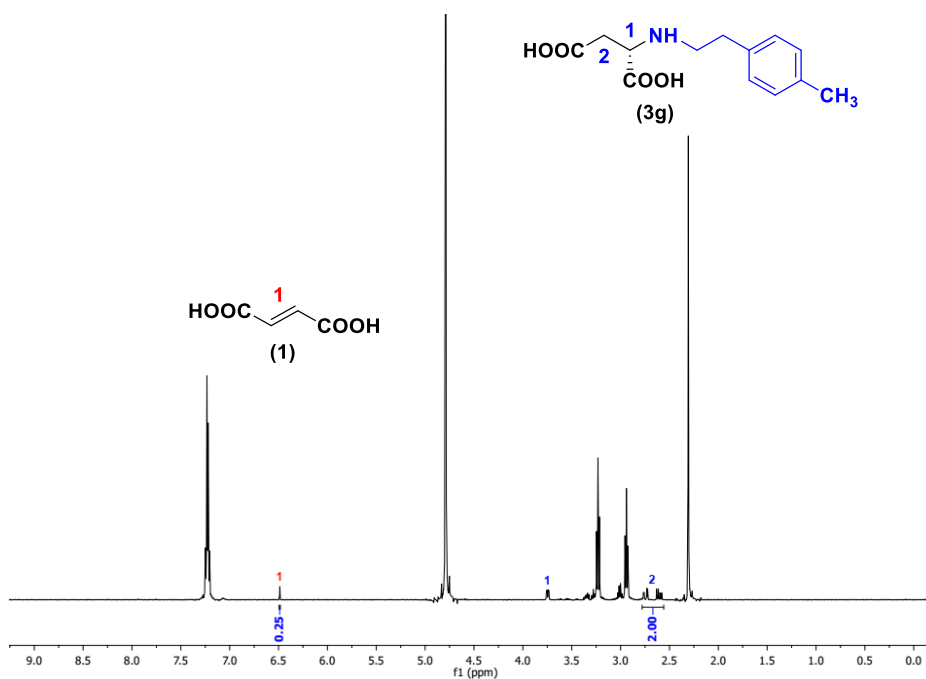

**Figure S7.** <sup>1</sup>H NMR spectra monitoring the EDDS lyase catalyzed asymmetric addition of **2g** to fumarate (**1**). The conversion of substrates into corresponding product (**3g**) is 89%.

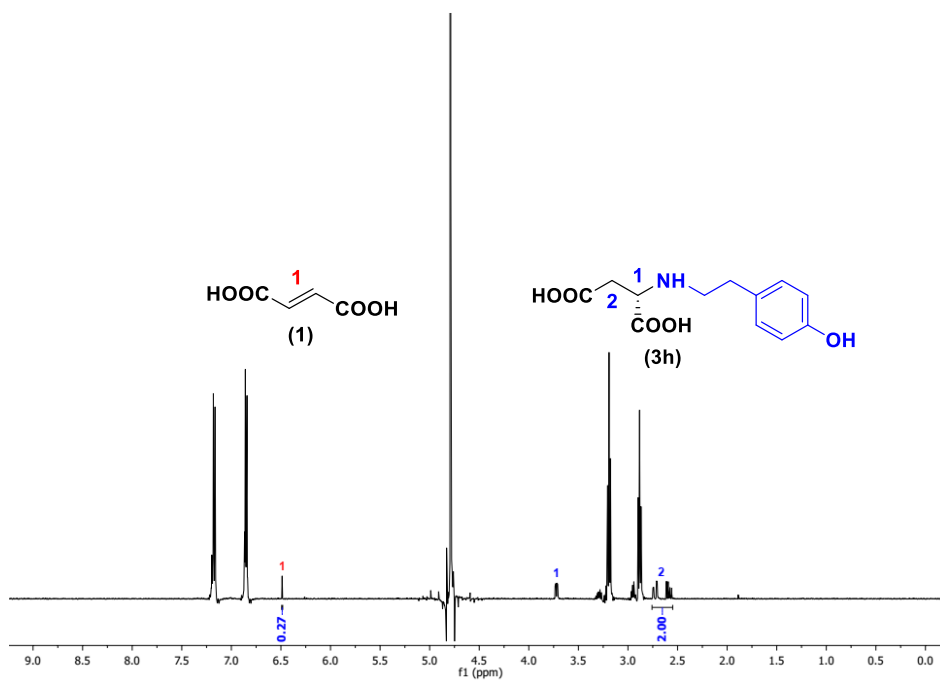

**Figure S8.** <sup>1</sup>H NMR spectra monitoring the EDDS lyase catalyzed asymmetric addition of **2h** to fumarate (**1**). The conversion of substrates into corresponding product (**3h**) is 88%.

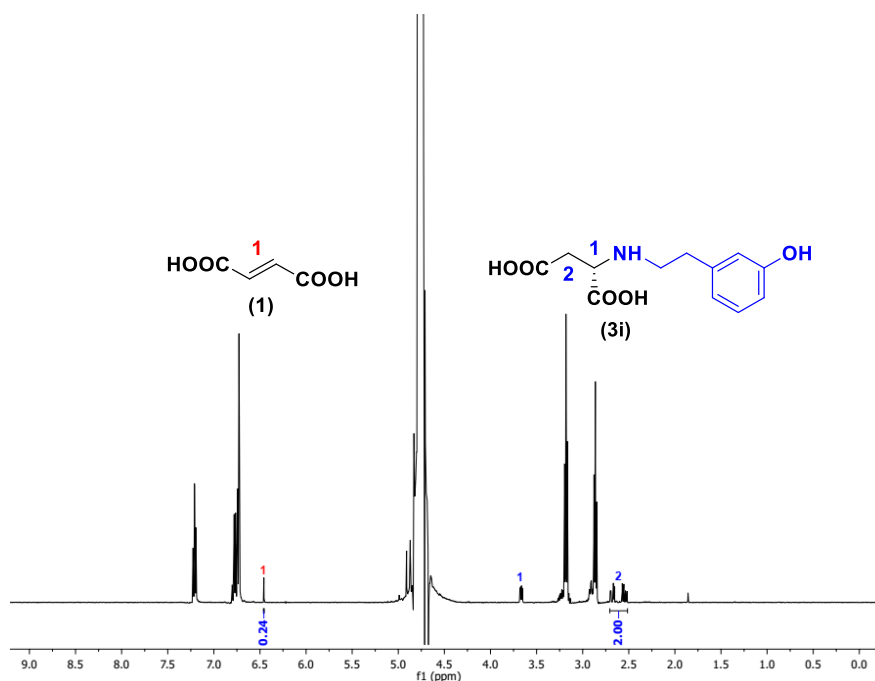

**Figure S9.** <sup>1</sup>H NMR spectra monitoring the EDDS lyase catalyzed asymmetric addition of **2i** to fumarate (**1**). The conversion of substrates into corresponding product (**3i**) is 89%.



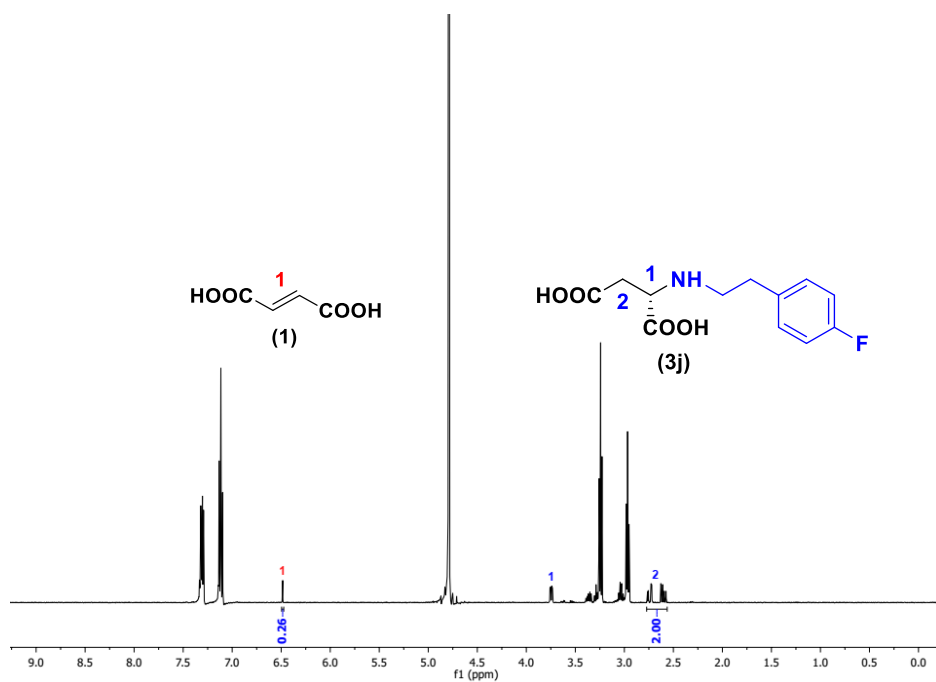

**Figure S10.** <sup>1</sup>H NMR spectra monitoring the EDDS lyase catalyzed asymmetric addition of **2j** to fumarate (**1**). The conversion of substrates into corresponding product (**3j**) is 88%.

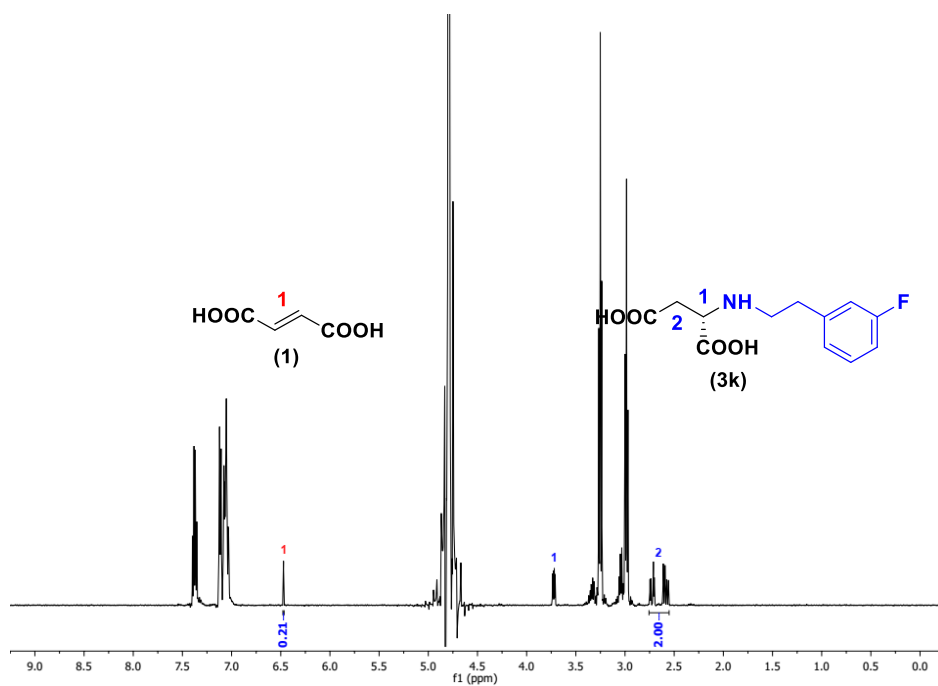

**Figure S11.** <sup>1</sup>H NMR spectra monitoring the EDDS lyase catalyzed asymmetric addition of **2k** to fumarate (**1**). The conversion of substrates into corresponding product (**3k**) is 90%.

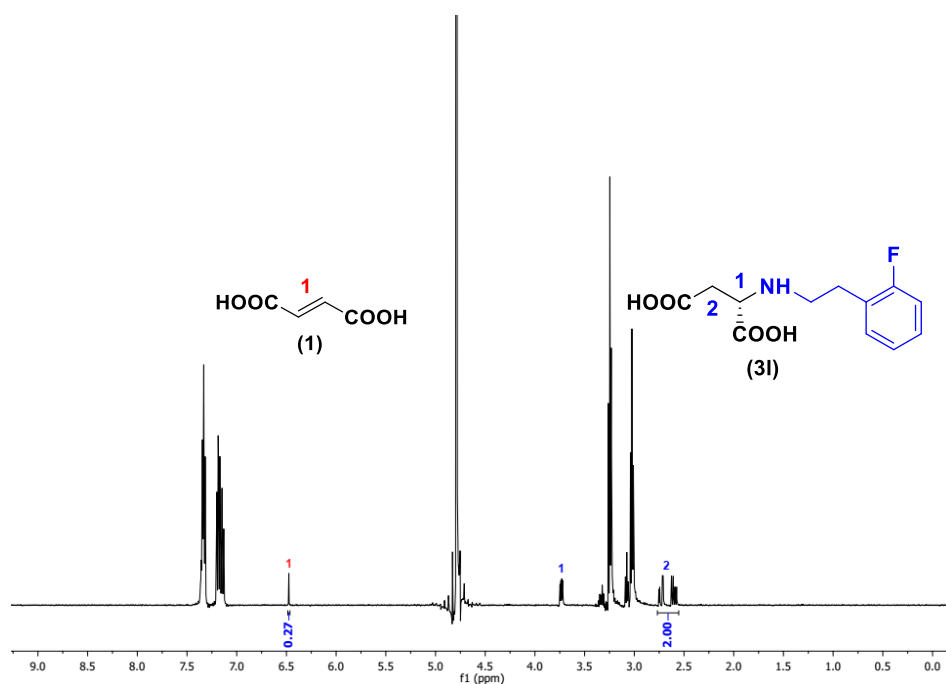

**Figure S12.** <sup>1</sup>H NMR spectra monitoring the EDDS lyase catalyzed asymmetric addition of **2l** to fumarate (**1**). The conversion of substrates into corresponding product (**3l**) is 88%.

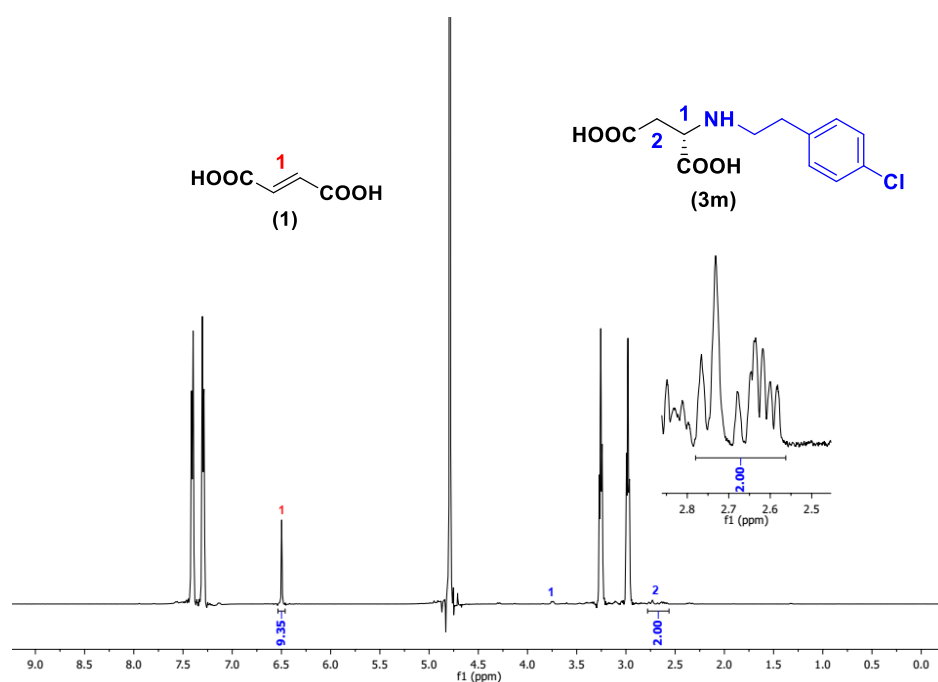

**Figure S13.** <sup>1</sup>H NMR spectra monitoring the EDDS lyase catalyzed asymmetric addition of **2m** to fumarate (**1**). The conversion of substrates into corresponding product (**3m**) is 18%.

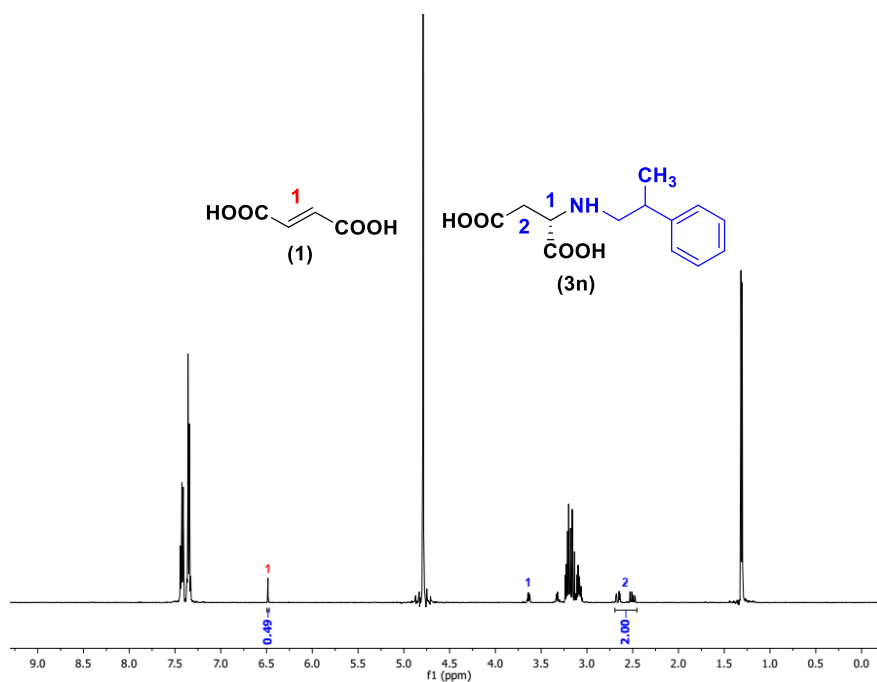

**Figure S14.**  $^1\text{H}$  NMR spectra monitoring the EDDS lyase catalyzed asymmetric addition of **2n** to fumarate (**1**). The conversion of substrates into corresponding product (**3n**) is 80%.

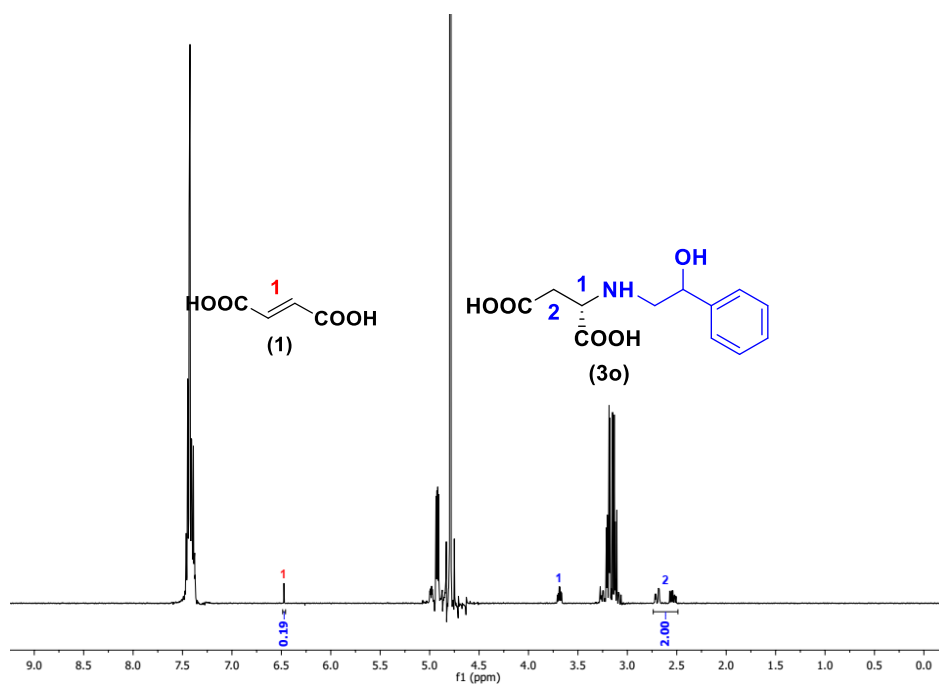

**Figure S15.**  $^1\text{H}$  NMR spectra monitoring the EDDS lyase catalyzed asymmetric addition of **2o** to fumarate (**1**). The conversion of substrates into corresponding product (**3o**) is 91%.

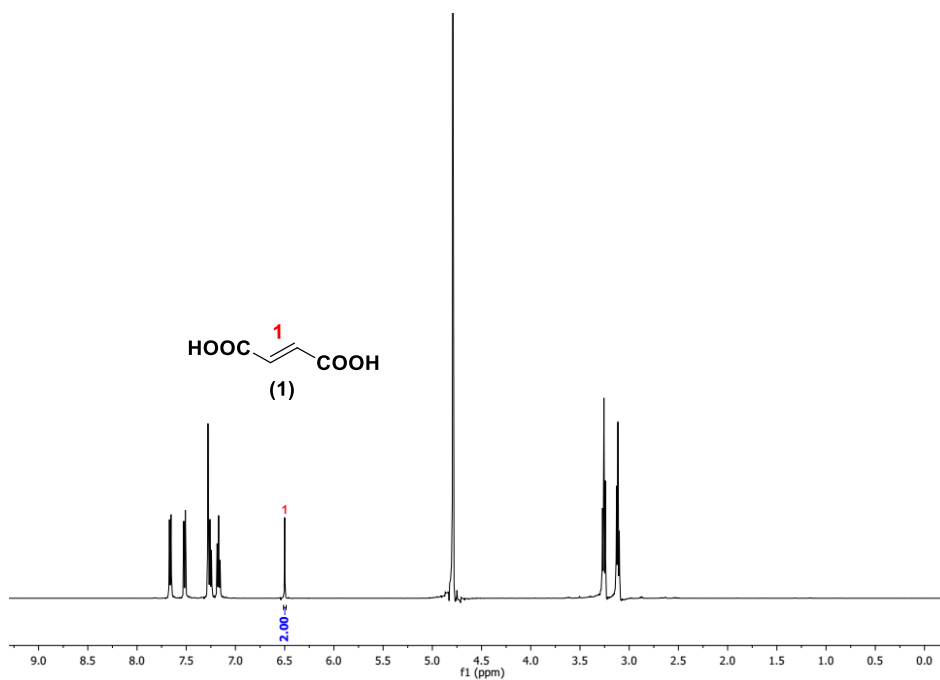

**Figure S16.** <sup>1</sup>H NMR spectra monitoring the EDDS lyase catalyzed asymmetric addition of **2p** to fumarate (**1**). No product formation was observed.

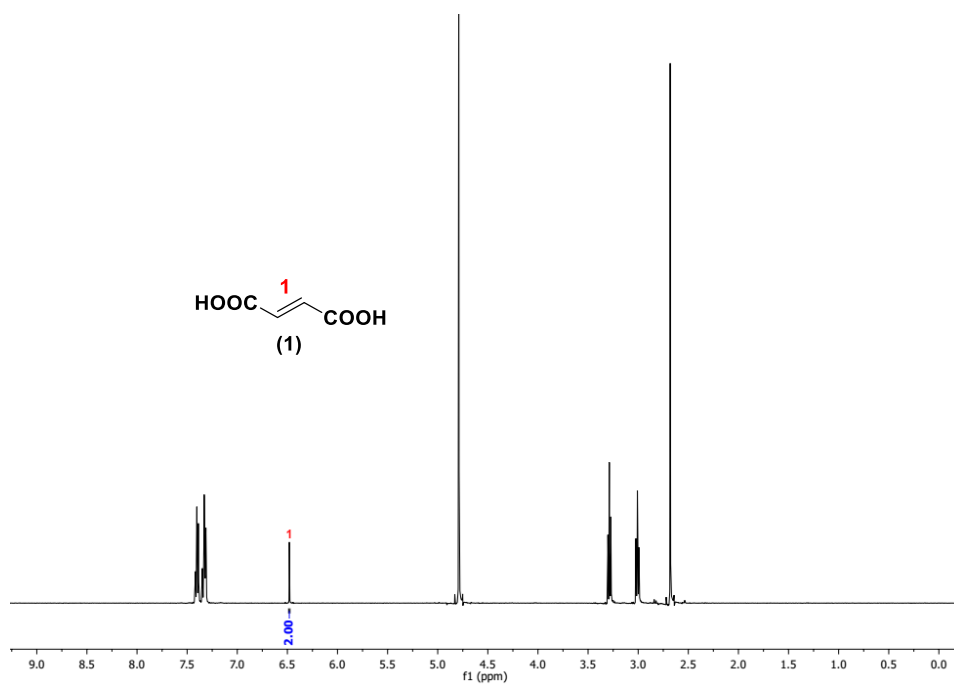

**Figure S17.** <sup>1</sup>H NMR spectra monitoring the EDDS lyase catalyzed asymmetric addition of **2q** to fumarate (**1**). No product formation was observed.

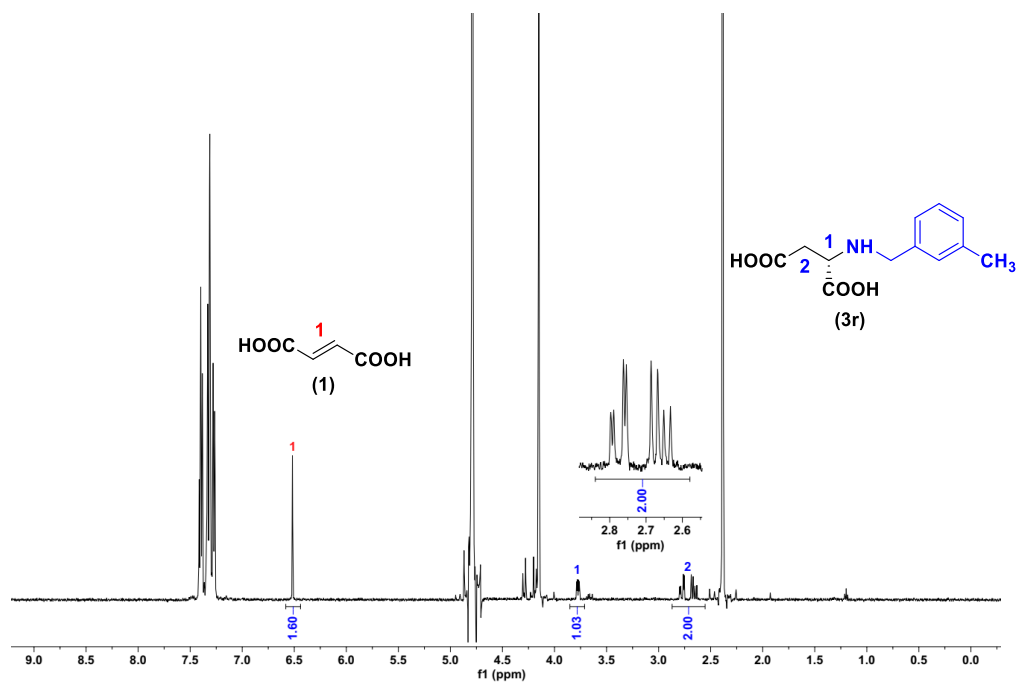

**Figure S18.** <sup>1</sup>H NMR spectrum monitoring the EDDS lyase catalyzed asymmetric addition of **2r** to fumarate (**1**). The conversion of substrates into corresponding product (**3r**) is 56%.

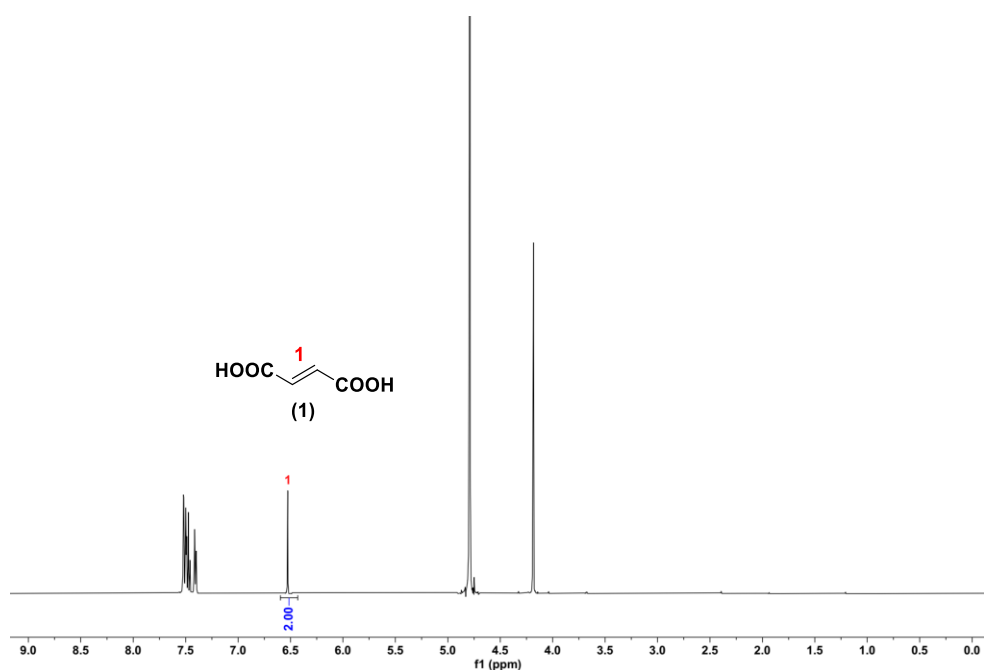

**Figure S19.** <sup>1</sup>H NMR spectra monitoring the EDDS lyase catalyzed asymmetric addition of **2s** to fumarate (**1**). No product formation was observed.

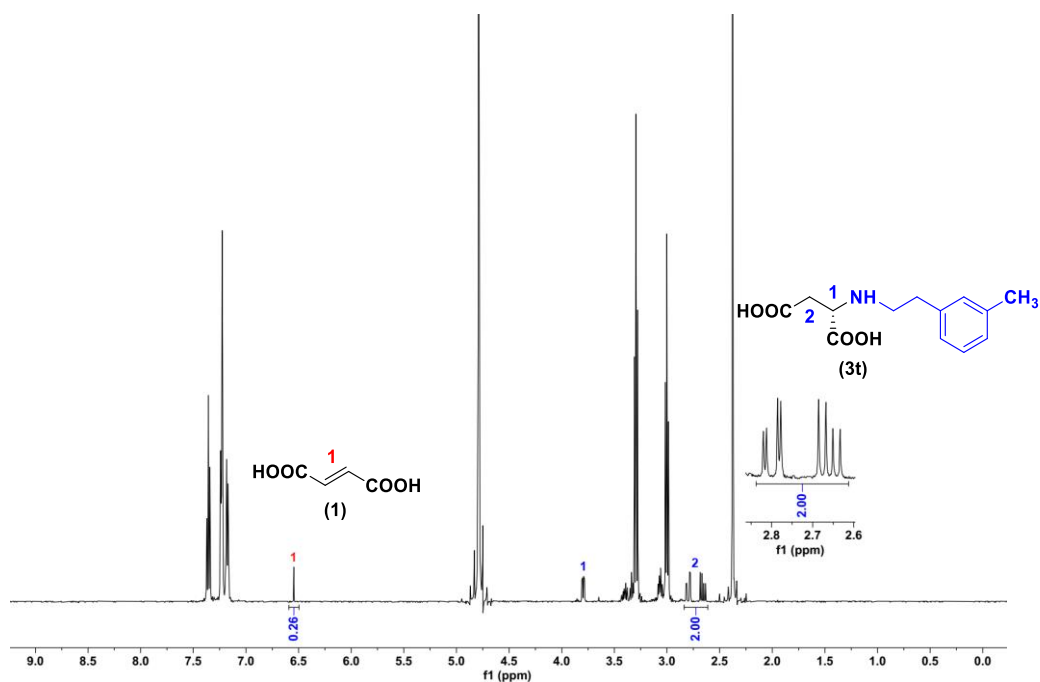

**Figure S20.**  $^1\text{H}$  NMR spectra monitoring the EDDS lyase catalyzed asymmetric addition of **2t** to fumarate (**1**). The conversion of substrates into corresponding product (**3t**) is 89%.

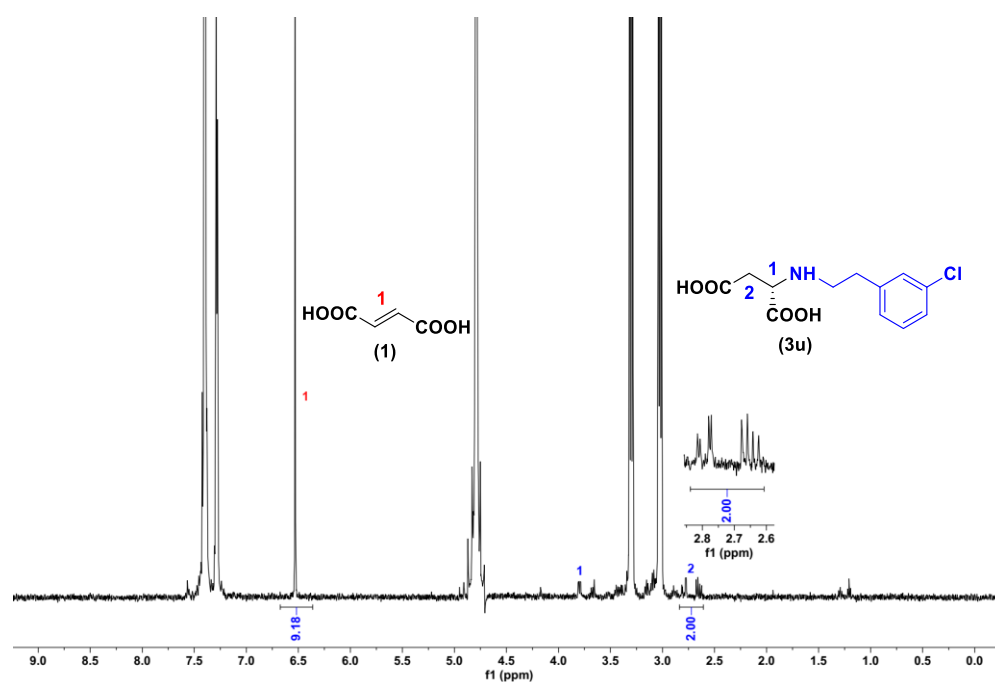

**Figure S21.**  $^1\text{H}$  NMR spectra monitoring the EDDS lyase catalyzed asymmetric addition of **2u** to fumarate (**1**). The conversion of substrates into corresponding product (**3u**) is 18%.



## NMR data

### ***N*-phenethyl-L-aspartic acid (3a)**

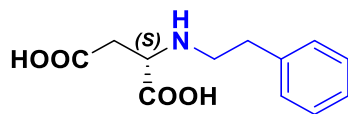

White powder. 25 mg (70% yield, *ee* >99%). <sup>1</sup>H NMR (500 MHz, Deuterium Oxide) δ 7.45 – 7.40 (m, 2H), 7.37 – 7.32 (m, 3H), 3.80 (dd, *J* = 8.7, 4.0 Hz, 1H), 3.45 – 3.30 (m, 2H), 3.12 – 3.02 (m, 2H), 2.80 (dd, *J* = 17.6, 4.0 Hz, 1H), 2.67 (dd, *J* = 17.6, 8.7 Hz, 1H). <sup>13</sup>C NMR (126 MHz, Deuterium Oxide) δ 176.80, 172.89, 136.34, 129.06, 128.77, 127.33, 59.34, 47.51, 35.09, 31.87. HRMS (ESI<sup>+</sup>): calcd. for C<sub>12</sub>H<sub>16</sub>NO<sub>4</sub>, 238.1001 [M+H]<sup>+</sup>; found: 238.1073.

### ***N*-(4-fluorobenzyl)-L-aspartic acid (3c)**

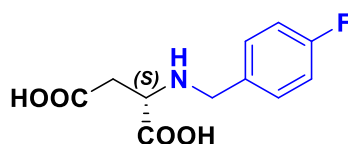

White powder. 27 mg (75% yield, *ee* >99%). <sup>1</sup>H NMR (500 MHz, Deuterium Oxide) δ 7.43 – 7.38 (m, 2H), 7.15 – 7.06 (m, 2H), 4.22 (d, *J* = 13.2 Hz, 1H), 4.14 (d, *J* = 13.2 Hz, 1H), 3.70 (dd, *J* = 8.9, 4.0 Hz, 1H), 2.70 (dd, *J* = 17.6, 4.0 Hz, 1H), 2.58 (dd, *J* = 17.6, 8.9 Hz, 1H). <sup>13</sup>C NMR (126 MHz, Deuterium Oxide) δ 176.94, 172.92, 164.05, 162.10, 131.93, 126.81, 116.12, 58.48, 49.28, 35.48. HRMS (ESI<sup>+</sup>): calcd. for C<sub>11</sub>H<sub>13</sub>FNO<sub>4</sub>, 242.0750 [M+H]<sup>+</sup>; found: 242.0822.

### ***N*-(4-chlorobenzyl)-L-aspartic acid (3d)**

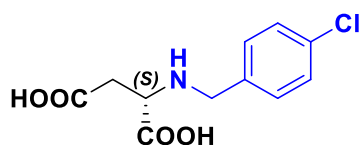

White powder. 11 mg (28% yield, *ee* >99%). <sup>1</sup>H NMR (500 MHz, Deuterium Oxide) δ 7.48 – 7.42 (m, 4H), 4.27 (d, *J* = 13.2 Hz, 1H), 4.19 (d, *J* = 13.2 Hz, 1H), 3.75 (dd, *J* = 9.1, 3.9 Hz, 1H), 2.75 (dd, *J* = 17.4, 3.9 Hz, 1H), 2.62 (dd, *J* = 17.5, 9.1 Hz, 1H). <sup>13</sup>C NMR (126 MHz, Deuterium Oxide) δ 177.33, 173.33, 134.83, 131.25, 129.84, 129.17, 58.82, 49.29, 35.84. HRMS (ESI<sup>+</sup>): calcd. for C<sub>11</sub>H<sub>13</sub>ClNO<sub>4</sub>, 258.0454 [M+H]<sup>+</sup>; found: 258.0528.



### ***N*-(4-methylphenethyl)-L-aspartic acid (3g)**

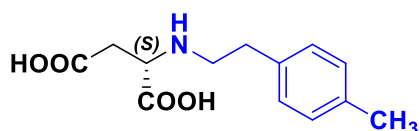

White powder. 25 mg (66% yield, ee >99%). <sup>1</sup>H NMR (500 MHz, Deuterium Oxide) δ 7.25 – 7.19 (m, 4H), 3.82 (dd, *J* = 7.9, 4.2 Hz, 1H), 3.38 – 3.25 (m, 2H), 3.06 – 2.95 (m, 2H), 2.85 (dd, *J* = 17.7, 4.2 Hz, 1H), 2.75 (dd, *J* = 17.7, 7.9 Hz, 1H), 2.30 (s, 3H). <sup>13</sup>C NMR (126 MHz, Deuterium Oxide) δ 175.87, 172.59, 137.41, 133.15, 129.60, 128.73, 58.89, 47.70, 34.66, 31.36, 20.05. HRMS (ESI<sup>+</sup>): calcd. for C<sub>13</sub>H<sub>18</sub>NO<sub>4</sub>, 252.1157 [M+H]<sup>+</sup>; found: 252.1230.

### ***N*-(4-hydroxyphenethyl)-L-aspartic acid (3h)**

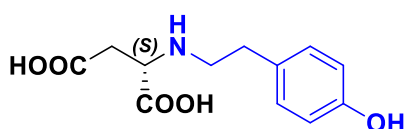

White powder. 23 mg (61% yield, ee >99%). <sup>1</sup>H NMR (500 MHz, Deuterium Oxide) δ 7.23 – 7.18 (m, 2H), 6.91 – 6.86 (m, 2H), 3.79 (dd, *J* = 8.4, 4.1 Hz, 1H), 3.38 – 3.31 (m, 1H), 3.30 – 3.24 (m, 1H), 3.02 – 2.93 (m, 2H), 2.81 (dd, *J* = 17.6, 4.1 Hz, 1H), 2.69 (dd, *J* = 17.6, 8.4 Hz, 1H). <sup>13</sup>C NMR (126 MHz, Deuterium Oxide) δ 176.56, 172.84, 154.49, 130.16, 128.11, 115.74, 59.18, 47.71, 34.96, 30.99. HRMS (ESI<sup>+</sup>): calcd. for C<sub>12</sub>H<sub>16</sub>NO<sub>5</sub>, 254.0950 [M+H]<sup>+</sup>; found: 254.1022.

### ***N*-(3-hydroxyphenethyl)-L-aspartic acid (3i)**

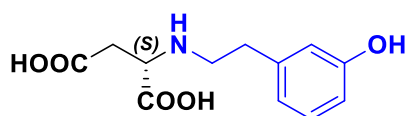

White powder. 24 mg (63% yield, ee >99%). <sup>1</sup>H NMR (500 MHz, Deuterium Oxide) δ 7.28 – 7.23 (m, 1H), 6.86 (d, *J* = 7.7 Hz, 1H), 6.79 (dd, *J* = 5.3, 2.8 Hz, 2H), 3.74 (dd, *J* = 8.8, 3.9 Hz, 1H), 3.37 – 3.32 (m, 1H), 3.29 – 3.24 (m, 1H), 3.03 – 2.93 (m, 2H), 2.74 (dd, *J* = 17.5, 3.9 Hz, 1H), 2.60 (dd, *J* = 17.5, 8.8 Hz, 1H). <sup>13</sup>C NMR (126 MHz, Deuterium Oxide) δ 177.33, 173.11, 155.89, 138.31, 130.46, 120.83, 115.61, 114.28, 59.54, 47.28, 35.35, 31.81. HRMS (ESI<sup>+</sup>): calcd. for C<sub>12</sub>H<sub>16</sub>NO<sub>5</sub>, 254.0950 [M+H]<sup>+</sup>; found: 254.1022.

### ***N*-(4-fluorophenethyl)-L-aspartic acid (3j)**

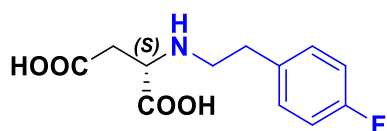

White powder. 29 mg (76% yield, *ee* >99%). <sup>1</sup>H NMR (500 MHz, Deuterium Oxide) δ 7.35 – 7.27 (m, 2H), 7.12 – 7.09 (m, 2H), 3.79 (dd, *J* = 8.2, 3.9 Hz, 1H), 3.37 (dt, *J* = 13.8, 7.2 Hz, 1H), 3.33 – 3.25 (m, 1H), 3.08 – 2.98 (m, 2H), 2.80 (dd, *J* = 17.6, 3.8 Hz, 1H), 2.68 (dd, *J* = 17.6, 8.4 Hz, 1H). <sup>13</sup>C NMR (126 MHz, Deuterium Oxide) δ 176.53, 172.78, 162.72, 160.79, 132.07, 130.48, 115.71, 59.20, 47.54, 34.94, 31.07. HRMS (ESI<sup>+</sup>): calcd. for C<sub>12</sub>H<sub>15</sub>FNO<sub>4</sub>, 256.0906 [M+H]<sup>+</sup>; found: 256.0976.

## **2.4 Chemical synthesis of *N*-arylalkyl-substituted D- and L-aspartic acids**

Chemical synthesis of *N*-substituted L- or D-aspartic acids was performed using a previously described procedure with a slight modification.<sup>1,3</sup> In general, the reaction was performed in a vial (10 mL). A mixture of L- or D-Aspartic acid (104 mg, 0.78 mmol, 1 eq) and an appropriate aldehyde (1.2 eq) in dry methanol (2 mL) was added to a solution (1 mL) of sodium cyanoborohydride (72.5 mg, 1.15 mmol, 1.5 eq) in dry methanol. The mixture was stirred for 24 – 48 hours at room temperature. The reaction mixture was coated first on silica and the desired product purified by flash (silica) chromatography [dichloromethane/methanol (50%)]. The fractions containing purified product were combined, concentrated, and dried under vacuum.

### ***N*-phenethyl-D-aspartic acid (D-3a)**

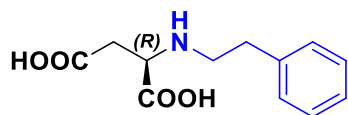

Compound D-3a was obtained by reacting phenylacetaldehyde (108 mg, 0.90 mmol) with D-aspartic acid (104 mg, 0.78 mmol) and sodium cyanoborohydride (72.5 mg, 1.15 mmol). The desired product was further purified by silica column chromatography (DCM/MeOH: 50:50, v/v).

81 mg (44% yield). <sup>1</sup>H NMR (500 MHz, Deuterium Oxide) δ 7.44 – 7.38 (m, 2H), 7.36 – 7.31 (m, 3H), 3.76 (dd, *J* = 8.7, 3.9 Hz, 1H), 3.39 (dt, *J* = 13.1, 6.8 Hz, 1H), 3.31 (dd, *J* = 13.4,

5.9 Hz, 1H), 3.10 – 3.00 (m, 2H), 2.76 (dd,  $J = 17.5, 3.9$  Hz, 1H), 2.63 (dd,  $J = 17.5, 8.8$  Hz, 1H).  $^{13}\text{C}$  NMR (126 MHz, Deuterium Oxide)  $\delta$  177.16, 173.01, 136.36, 129.07, 128.78, 127.33, 59.47, 47.46, 35.26, 31.90. HRMS (ESI<sup>+</sup>): calcd. for  $\text{C}_{12}\text{H}_{16}\text{NO}_4$ , 238.1001 [M+H]<sup>+</sup>; found: 238.1071.

### **N-phenethyl-L-aspartic acid (L-3a)**

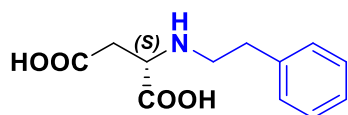

Compound L-**3a** was obtained by reacting phenylacetaldehyde (108 mg, 0.90 mmol) with L-aspartic acid (104 mg, 0.78 mmol) and sodium cyanoborohydride (72.5 mg, 1.15 mmol). The desired product was further purified by silica column chromatography (DCM/MeOH: 50:50, v/v).

74 mg (40% yield).  $^1\text{H}$  NMR (500 MHz, Deuterium Oxide)  $\delta$  7.46 – 7.43 (m, 2H), 7.40 – 7.36 (m, 3H), 3.80 (dd,  $J = 8.7, 3.9$  Hz, 1H), 3.47 – 3.39 (m, 1H), 3.38 – 3.30 (m, 1H), 3.14 – 3.04 (m, 2H), 2.81 (dd,  $J = 17.5, 3.9$  Hz, 1H), 2.67 (dd,  $J = 17.5, 8.7$  Hz, 1H).  $^{13}\text{C}$  NMR (126 MHz, Deuterium Oxide)  $\delta$  177.08, 172.99, 136.39, 129.10, 128.81, 127.36, 59.42, 47.49, 35.24, 31.92. HRMS (ESI<sup>+</sup>): calcd. for  $\text{C}_{12}\text{H}_{16}\text{NO}_4$ , 238.1001 [M+H]<sup>+</sup>; found: 238.1073.

### **N-(4-fluorobenzyl)-D-aspartic acid (D-3c)**

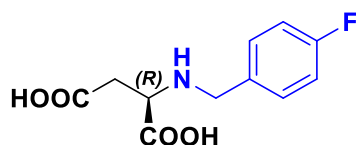

Compound D-**3c** was obtained by reacting 4-fluorobenzaldehyde (111.5 mg, 0.90 mmol) with D-aspartic acid (104 mg, 0.78 mmol) and sodium cyanoborohydride (72.5 mg, 1.15 mmol).

69 mg (37% yield).  $^1\text{H}$  NMR (500 MHz, Deuterium Oxide)  $\delta$  7.52 – 7.46 (m, 2H), 7.22 – 7.18 (m, 2H), 4.32 (d,  $J = 13.2$  Hz, 1H), 4.23 (d,  $J = 13.1$  Hz, 1H), 3.78 (dd,  $J = 9.0, 3.9$  Hz, 1H), 2.78 (dd,  $J = 17.6, 3.9$  Hz, 1H), 2.66 (dd,  $J = 17.5, 9.1$  Hz, 1H).  $^{13}\text{C}$  NMR (126 MHz, Deuterium Oxide)  $\delta$  177.14, 172.99, 164.06, 162.11, 131.93, 126.85, 115.95, 58.55, 49.26, 35.58. HRMS (ESI<sup>+</sup>): calcd. for  $\text{C}_{11}\text{H}_{13}\text{FNO}_4$ , 242.0750 [M+H]<sup>+</sup>; found: 242.0821.

### ***N*-(4-fluorobenzyl)-L-aspartic acid (L-3c)**

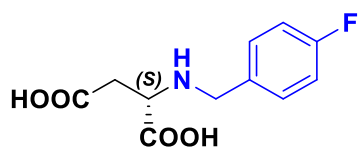

Compound L-3c was obtained by reacting 4-fluorobenzaldehyde (111.5 mg, 0.90 mmol) with L-aspartic acid (104 mg, 0.78 mmol) and sodium cyanoborohydride (72.5 mg, 1.15 mmol).

51 mg (27% yield).  $^1\text{H}$  NMR (500 MHz, Deuterium Oxide)  $\delta$  7.45 – 7.37 (m, 2H), 7.14 – 7.09 (m, 2H), 4.23 (d,  $J$  = 13.1 Hz, 1H), 4.14 (d,  $J$  = 13.2 Hz, 1H), 3.70 (dd,  $J$  = 9.0, 3.7 Hz, 1H), 2.69 (dd,  $J$  = 17.5, 3.6 Hz, 1H), 2.57 (dd,  $J$  = 17.6, 8.9 Hz, 1H).  $^{13}\text{C}$  NMR (126 MHz, Deuterium Oxide)  $\delta$  177.14, 172.99, 164.06, 162.10, 131.94, 126.85, 116.13, 58.56, 49.26, 35.58. HRMS (ESI<sup>+</sup>): calcd. for  $\text{C}_{11}\text{H}_{13}\text{FNO}_4$ , 242.0750  $[\text{M}+\text{H}]^+$ ; found: 242.0820.

### ***N*-(4-chlorobenzyl)-D-aspartic acid (D-3d)**

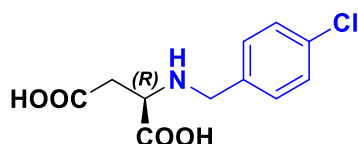

Compound D-3d was obtained by reacting 4-chlorobenzaldehyde (126.5 mg, 0.90 mmol) with D-aspartic acid (104 mg, 0.78 mmol) and sodium cyanoborohydride (72.5 mg, 1.15 mmol).

54 mg (27% yield).  $^1\text{H}$  NMR (500 MHz, Deuterium Oxide)  $\delta$  7.50 – 7.48 (m, 2H), 7.47 – 7.45 (m, 2H), 4.32 (d,  $J$  = 13.1 Hz, 1H), 4.23 (d,  $J$  = 13.1 Hz, 1H), 3.79 (dd,  $J$  = 9.6, 3.3 Hz, 1H), 2.78 (dd,  $J$  = 17.6, 3.8 Hz, 1H), 2.66 (dd,  $J$  = 17.5, 9.2 Hz, 1H).  $^{13}\text{C}$  NMR (126 MHz, Deuterium Oxide)  $\delta$  177.16, 173.01, 136.36, 129.07, 128.78, 127.33, 59.47, 47.46, 35.26. HRMS (ESI<sup>+</sup>): calcd. for  $\text{C}_{11}\text{H}_{13}\text{ClNO}_4$ , 258.0454  $[\text{M}+\text{H}]^+$ ; found: 258.0527.

### ***N*-(4-chlorobenzyl)-L-aspartic acid (L-3d)**

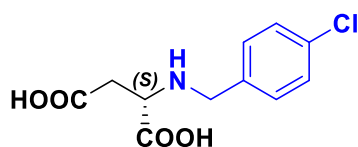

Compound L-3d was obtained by reacting 4-chlorobenzaldehyde (126.5 mg, 0.90 mmol) with L-aspartic acid (104 mg, 0.78 mmol) and sodium cyanoborohydride (72.5 mg, 1.15 mmol).

53 mg (26% yield).  $^1\text{H}$  NMR (500 MHz, Deuterium Oxide)  $\delta$  7.50 (d,  $J$  = 7.9 Hz, 2H), 7.46 (d,  $J$  = 8.0 Hz, 2H), 4.33 (d,  $J$  = 13.2 Hz, 1H), 4.24 (d,  $J$  = 13.2 Hz, 1H), 3.85 – 3.75 (m, 1H), 2.80 (dd,  $J$  = 17.6, 3.8 Hz, 1H), 2.68 (dd,  $J$  = 17.6, 9.1 Hz, 1H).  $^{13}\text{C}$  NMR (126 MHz, Deuterium Oxide)  $\delta$  177.13, 172.94, 134.99, 131.34, 129.49, 129.24, 58.71, 49.28, 35.55. HRMS (ESI<sup>+</sup>): calcd. for  $\text{C}_{11}\text{H}_{13}\text{ClNO}_4$ , 258.0454  $[\text{M}+\text{H}]^+$ ; found: 258.0526.

### ***N*-(4-methylphenethyl)-D-aspartic acid (D-3g)**

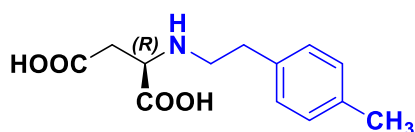

Compound **D-3g** was obtained by reacting 2-(4-methylphenyl)acetaldehyde (121 mg, 0.90 mmol) with D-aspartic acid (104 mg, 0.78 mmol) and sodium cyanoborohydride (72.5 mg, 1.15 mmol).

81 mg (41% yield).  $^1\text{H}$  NMR (500 MHz, Deuterium Oxide)  $\delta$  7.26 – 7.20 (m, 4H), 3.76 (dd,  $J$  = 8.6, 4.0 Hz, 1H), 3.41 – 3.32 (m, 1H), 3.31 – 3.23 (m, 1H), 3.07 – 2.94 (m,  $J$  = 7.6 Hz, 2H), 2.77 (dd,  $J$  = 17.5, 4.0 Hz, 1H), 2.64 (dd,  $J$  = 17.5, 8.7 Hz, 1H), 2.31 (s, 3H).  $^{13}\text{C}$  NMR (126 MHz, Deuterium Oxide)  $\delta$  177.02, 172.97, 137.40, 133.22, 129.62, 128.74, 59.37, 47.54, 35.23, 31.47, 20.06. HRMS (ESI<sup>+</sup>): calcd. for  $\text{C}_{13}\text{H}_{18}\text{NO}_4$ , 252.1157  $[\text{M}+\text{H}]^+$ ; found: 252.1230.

### ***N*-(4-methylphenethyl)-L-aspartic acid (L-3g)**

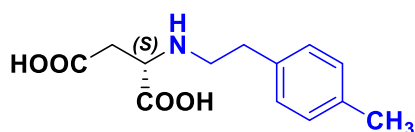

Compound **L-3g** was obtained by reacting 2-(4-methylphenyl)acetaldehyde (121 mg, 0.90 mmol) with L-aspartic acid (104 mg, 0.78 mmol) and sodium cyanoborohydride (72.5 mg, 1.15 mmol).

81 mg (41% yield).  $^1\text{H}$  NMR (500 MHz, Deuterium Oxide)  $\delta$  7.24 – 7.20 (m, 4H), 3.75 (dd,  $J$  = 8.6, 3.9 Hz, 1H), 3.36 – 3.30 (m, 1H), 3.28 – 3.20 (m, 1H), 3.01 – 2.97 (m, 2H), 2.77 (dd,  $J$  = 17.5, 3.9 Hz, 1H), 2.64 (dd,  $J$  = 17.5, 8.7 Hz, 1H), 2.30 (s, 3H).  $^{13}\text{C}$  NMR (126 MHz, Deuterium Oxide)  $\delta$  177.14, 173.00, 137.37, 133.21, 129.61, 128.73, 59.45, 47.50, 35.27, 31.47, 20.07. HRMS (ESI<sup>+</sup>): calcd. for  $\text{C}_{13}\text{H}_{18}\text{NO}_4$ , 252.1157  $[\text{M}+\text{H}]^+$ ; found: 252.1229.

### ***N*-(4-hydroxyphenethyl)-D-aspartic acid (D-3h)**

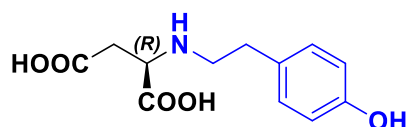

For the synthesis of compound **D-3h**, the appropriate starting material 2-(4-hydroxyphenyl)acetaldehyde was first prepared using a previously described method<sup>4</sup>. Subsequently, the synthesis of compound **D-3h** was achieved by reacting 2-(4-hydroxyphenyl)acetaldehyde (122.5 mg, 0.90 mmol) with D-aspartic acid (104 mg, 0.78 mmol) and sodium cyanoborohydride (72.5 mg, 1.15 mmol).

92 mg (47% yield). <sup>1</sup>H NMR (500 MHz, Deuterium Oxide) δ 7.20 (d, J = 7.5 Hz, 2H), 6.88 (d, J = 8.2 Hz, 2H), 3.76 (dd, J = 8.7, 3.7 Hz, 1H), 3.33 – 3.28 (m, 1H), 3.25 – 3.20 (m, 1H), 3.02 – 2.91 (m, 2H), 2.76 (dd, J = 17.4, 3.7 Hz, 1H), 2.62 (dd, J = 17.5, 8.8 Hz, 1H). <sup>13</sup>C NMR (126 MHz, Deuterium Oxide) δ 177.07, 172.99, 154.48, 130.16, 128.10, 115.84, 59.39, 47.62, 35.19, 31.04. HRMS (ESI+): calcd. for C<sub>12</sub>H<sub>16</sub>NO<sub>5</sub>, 254.0950 [M+H]<sup>+</sup>; found: 254.1021.

### ***N*-(4-hydroxyphenethyl)-L-aspartic acid (L-3h)**

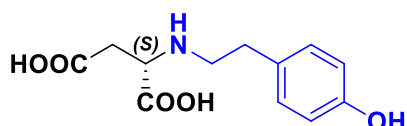

For the synthesis of compound **L-3h**, the appropriate starting material 2-(4-hydroxyphenyl)acetaldehyde was first prepared using a previously described method<sup>4</sup>. Subsequently, the synthesis of compound **L-3h** was achieved by reacting 2-(4-hydroxyphenyl)acetaldehyde (122.5 mg, 0.90 mmol) with L-aspartic acid (104 mg, 0.78 mmol) and sodium cyanoborohydride (72.5 mg, 1.15 mmol).

74 mg (37% yield). <sup>1</sup>H NMR (500 MHz, Deuterium Oxide) δ 7.17 (d, J = 8.2 Hz, 2H), 6.86 (d, J = 8.0 Hz, 2H), 3.75 (dd, J = 8.5, 3.7 Hz, 1H), 3.30 (dd, J = 13.1, 6.5 Hz, 1H), 3.26 – 3.18 (m, 1H), 3.02 – 2.91 (m, 2H), 2.77 (dd, J = 17.4, 3.9 Hz, 1H), 2.64 (dd, J = 17.3, 8.5 Hz, 1H). <sup>13</sup>C NMR (126 MHz, Deuterium Oxide) δ 177.07, 172.99, 154.48, 130.16, 128.10, 115.84, 59.39, 47.62, 35.19, 31.04. HRMS (ESI+): calcd. for C<sub>12</sub>H<sub>16</sub>NO<sub>5</sub>, 254.0950 [M+H]<sup>+</sup>; found: 254.1023.

### ***N*-(3-hydroxyphenethyl)-D-aspartic acid (D-3i)**

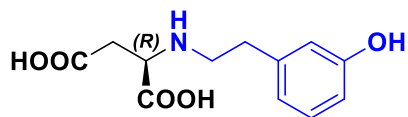

For the synthesis of compound D-3i, the starting material 2-(3-hydroxyphenyl)acetaldehyde was first prepared using a previously described method<sup>4</sup>. Subsequently, the synthesis of compound D-3i was obtained by reacting 2-(3-hydroxyphenyl)acetaldehyde (122.5 mg, 0.90 mmol) with D-aspartic acid (104 mg, 0.78 mmol) and sodium cyanoborohydride (72.5 mg, 1.15 mmol).

84 mg (43% yield). <sup>1</sup>H NMR (500 MHz, Deuterium Oxide) δ 7.33 – 7.30 (m, 1H), 6.94 – 6.92 (m, 1H), 6.87 – 6.85 (m, 2H), 3.80 (dd, J = 8.8, 3.8 Hz, 1H), 3.44 – 3.39 (m, 1H), 3.36 – 3.29 (m, 1H), 3.09 – 2.99 (m, 2H), 2.80 (dd, J = 17.5, 3.7 Hz, 1H), 2.67 (dd, J = 17.5, 8.8 Hz, 1H). <sup>13</sup>C NMR (126 MHz, Deuterium Oxide) δ 177.26, 173.05, 155.87, 138.33, 130.49, 120.90, 115.62, 114.30, 59.60, 47.33, 35.31, 31.82. HRMS (ESI+): calcd. for C<sub>12</sub>H<sub>16</sub>NO<sub>5</sub>, 254.0950 [M+H]<sup>+</sup>; found: 254.1022.

### ***N*-(3-hydroxyphenethyl)-L-aspartic acid (L-3i)**

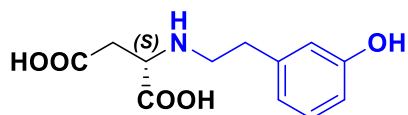

For the synthesis of compound L-3i, the starting material 2-(3-hydroxyphenyl)acetaldehyde was first prepared using a previously described method.<sup>4</sup> Subsequently, the synthesis of compound L-3i was obtained by reacting 2-(3-hydroxyphenyl)acetaldehyde (122.5 mg, 0.90 mmol) with L-aspartic acid (104 mg, 0.78 mmol) and sodium cyanoborohydride (72.5 mg, 1.15 mmol).

93 mg (47% yield). <sup>1</sup>H NMR (500 MHz, Deuterium Oxide) δ 7.29 – 7.26 (m, 1H), 6.90 – 6.87 (m, 1H), 6.84 – 6.81 (m, 2H), 3.76 (dd, J = 8.7, 3.8 Hz, 1H), 3.39 – 3.34 (m, 1H), 3.32 – 3.25 (m, 1H), 3.05 – 2.96 (m, 2H), 2.77 (dd, J = 17.8, 4.1 Hz, 1H), 2.64 (dd, J = 17.6, 8.7 Hz, 1H). <sup>13</sup>C NMR (126 MHz, Deuterium Oxide) δ 177.15, 172.99, 155.81, 138.25, 130.45, 120.89, 115.63, 114.31, 59.46, 47.29, 35.22, 31.77. HRMS (ESI+): calcd. for C<sub>12</sub>H<sub>16</sub>NO<sub>5</sub>, 254.0950 [M+H]<sup>+</sup>; found: 254.1023.

### ***N*-(4-fluorophenethyl)-D-aspartic acid (D-3j)**

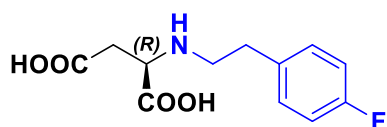

Compound **D-3j** was obtained by reacting 2-(4-fluorophenyl)acetaldehyde (124 mg, 0.90 mmol) with D-aspartic acid (104 mg, 0.78 mmol) and sodium cyanoborohydride (72.5 mg, 1.15 mmol).

89 mg (45% yield).  $^1\text{H}$  NMR (500 MHz, Deuterium Oxide)  $\delta$  7.37 – 7.30 (m, 2H), 7.14 – 7.11 (m, 2H), 3.79 – 3.76 (m, 1H), 3.42 – 3.36 (m, 1H), 3.34 – 3.27 (m, 1H), 3.11 – 3.00 (m, 2H), 2.78 (dd,  $J$  = 17.4, 3.5 Hz, 1H), 2.65 (dd,  $J$  = 17.5, 8.7 Hz, 1H).  $^{13}\text{C}$  NMR (126 MHz, Deuterium Oxide)  $\delta$  177.02, 172.94, 162.73, 160.80, 132.09, 130.49, 115.73, 115.56, 59.45, 47.48, 35.18, 31.12. HRMS (ESI<sup>+</sup>): calcd. for  $\text{C}_{12}\text{H}_{15}\text{FNO}_4$ , 256.0906 [M+H]<sup>+</sup>; found: 256.0979.

### ***N*-(4-fluorophenethyl)-L-aspartic acid (L-3j)**

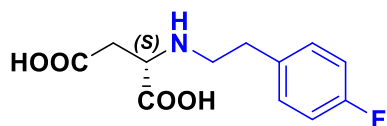

Compound **L-3j** was obtained by reacting 2-(4-fluorophenyl)acetaldehyde (124 mg, 0.90 mmol) with L-aspartic acid (104 mg, 0.78 mmol) and sodium cyanoborohydride (72.5 mg, 1.15 mmol).

69 mg (35% yield).  $^1\text{H}$  NMR (500 MHz, Deuterium Oxide)  $\delta$  7.26 – 7.21 (m, 2H), 7.05 – 7.01 (m, 2H), 3.68 (dd,  $J$  = 8.7, 3.9 Hz, 1H), 3.32 – 3.26 (m, 1H), 3.25 – 3.16 (m, 1H), 3.03 – 2.90 (m, 2H), 2.69 (dd,  $J$  = 17.5, 3.9 Hz, 1H), 2.56 (dd,  $J$  = 17.6, 8.7 Hz, 1H).  $^{13}\text{C}$  NMR (126 MHz, Deuterium Oxide)  $\delta$  177.06, 172.95, 162.72, 160.79, 132.09, 130.48, 115.72, 59.38, 47.47, 35.18, 31.12. HRMS (ESI<sup>+</sup>): calcd. for  $\text{C}_{12}\text{H}_{15}\text{FNO}_4$ , 256.0906 [M+H]<sup>+</sup>; found: 256.0978.



### 3. NMR spectra

#### 3.1 $^1\text{H}$ and $^{13}\text{C}$ NMR spectra of enzymatically obtained *N*-arylalkyl-substituted *L*-aspartic acids

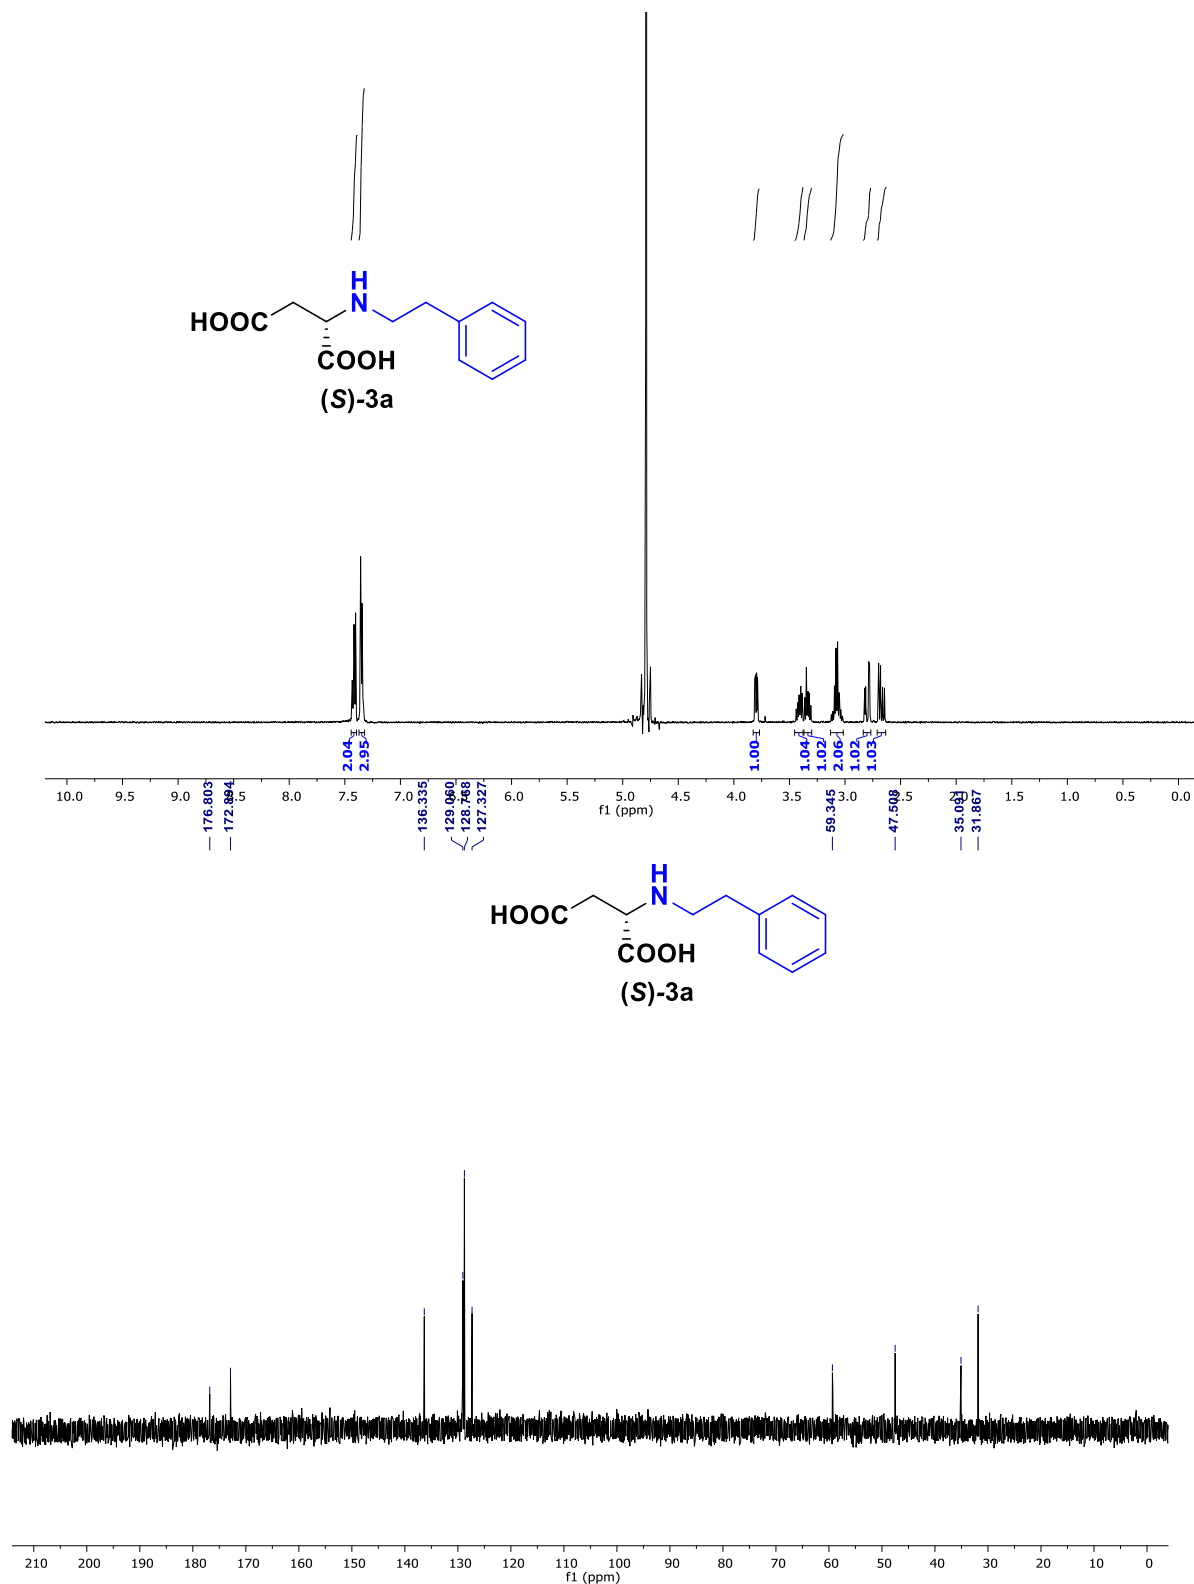

Figure S22.  $^1\text{H}$  NMR (top) and  $^{13}\text{C}$  NMR (bottom) of *N*-(phenethyl)-*L*-aspartic acid [(S)-3a].

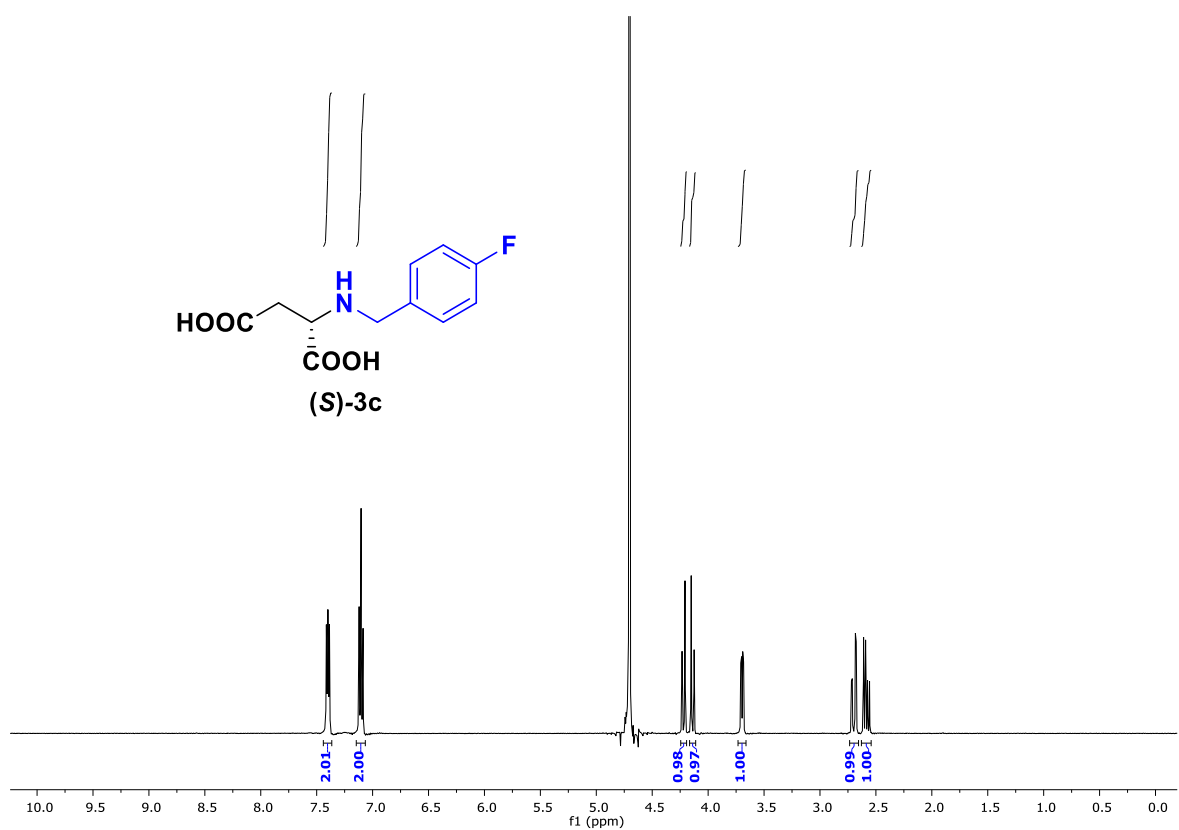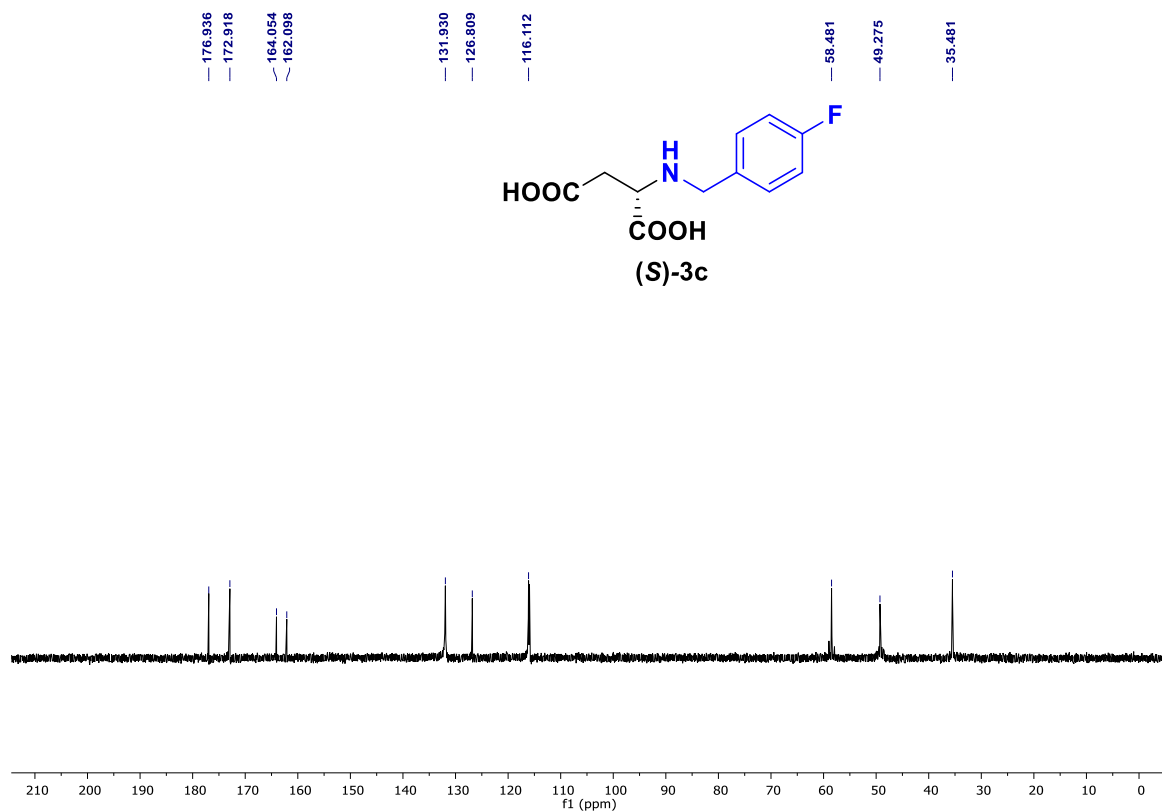

**Figure S23.** <sup>1</sup>H NMR (top) and <sup>13</sup>C NMR (bottom) of *N*-(4-fluorobenzyl)-L-aspartic acid [(*S*)-3c].

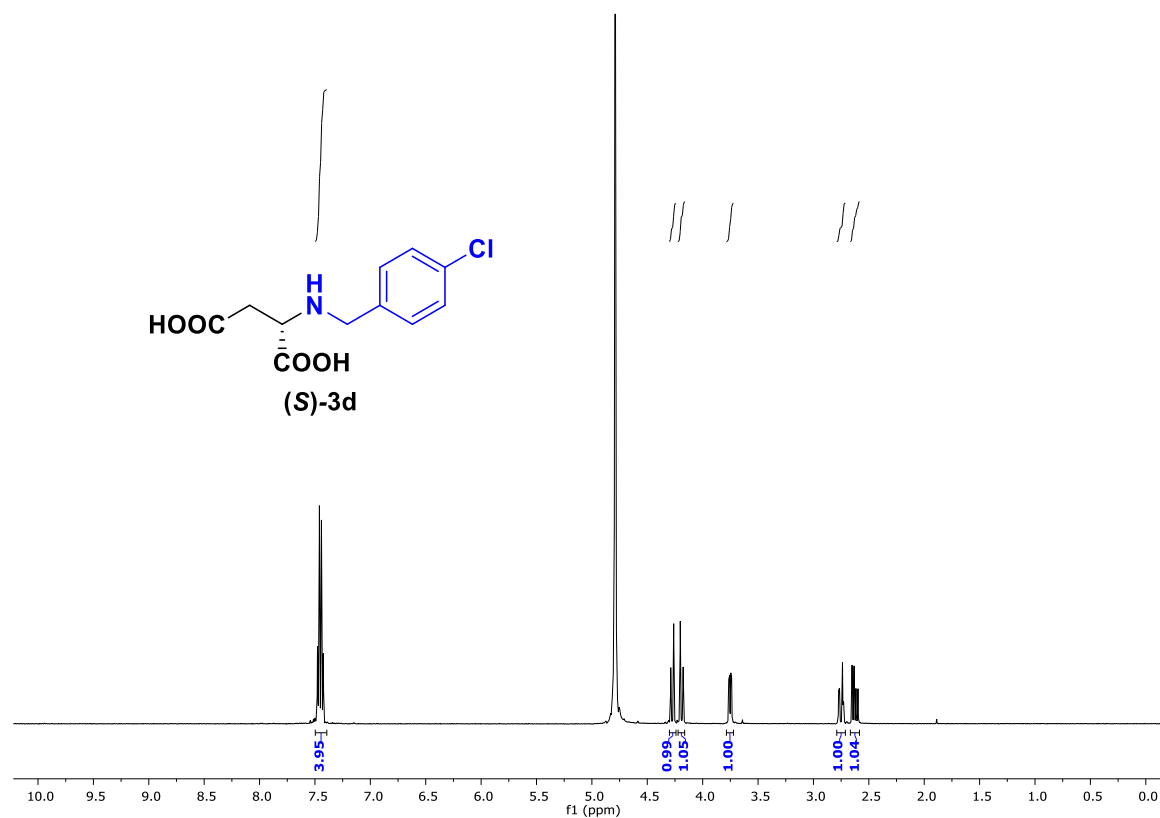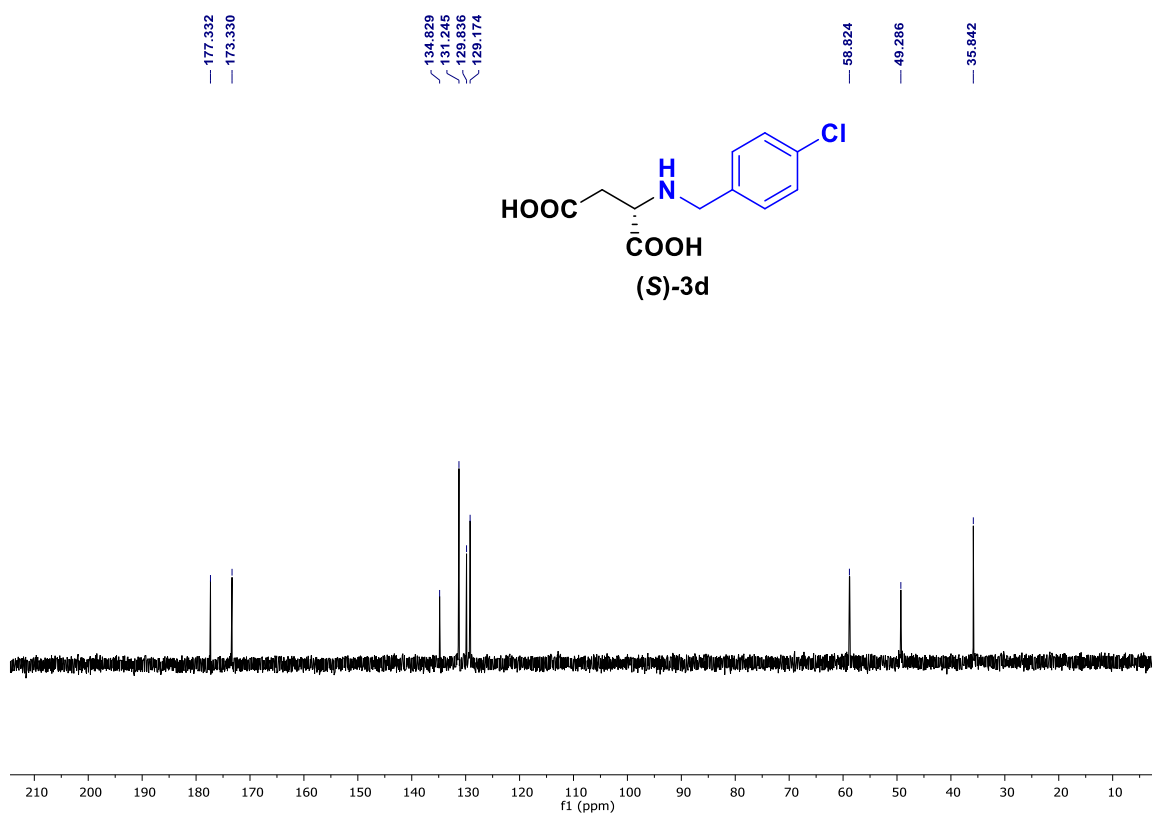

Figure S24. <sup>1</sup>H NMR (top) and <sup>13</sup>C NMR (bottom) of *N*-(4-chlorobenzyl)-L-aspartic acid [(*S*)-3d].

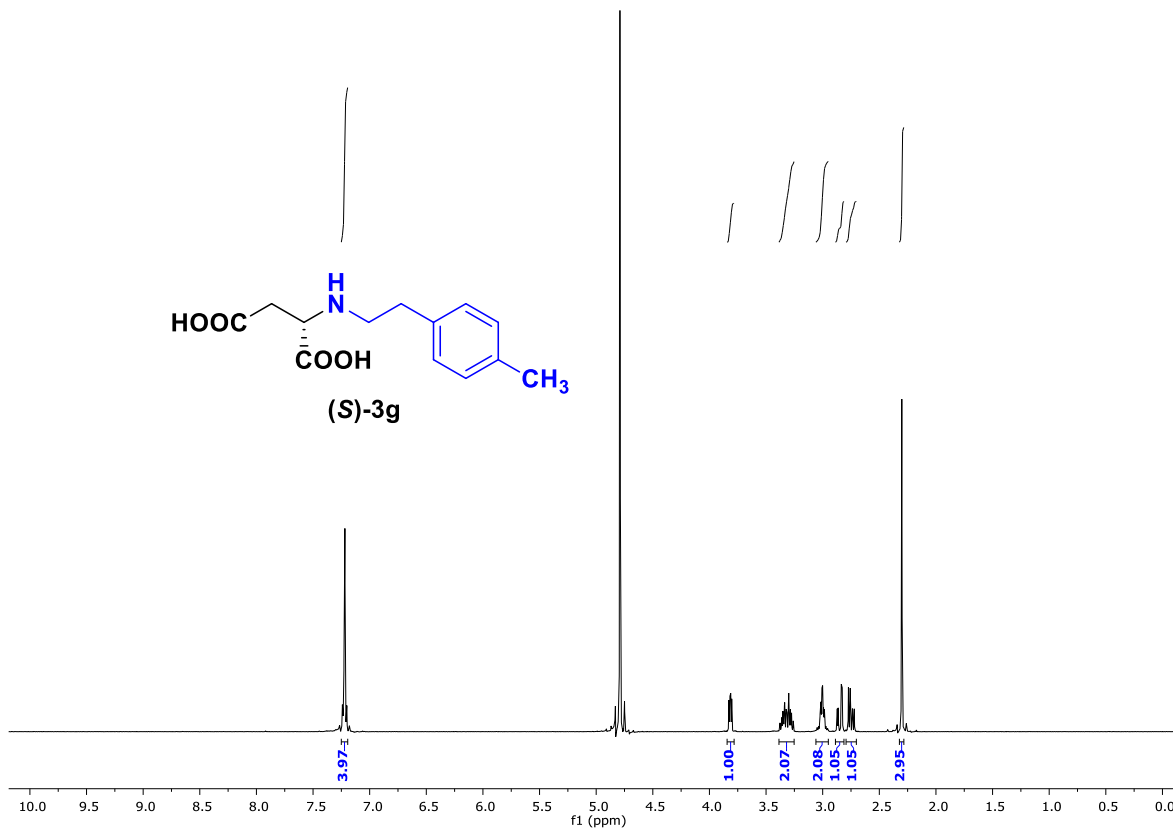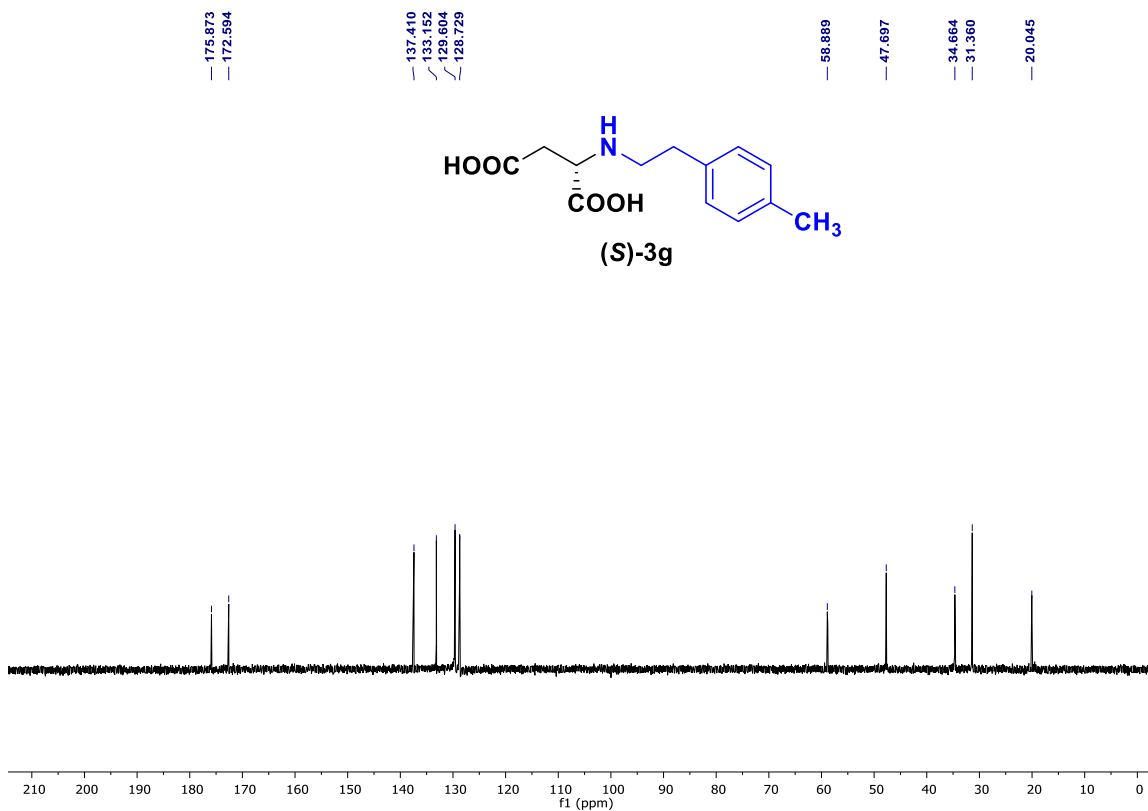

**Figure S25.** <sup>1</sup>H NMR (top) and <sup>13</sup>C NMR (bottom) of *N*-(4-methylphenethyl)-L-aspartic acid [(S)-3g].

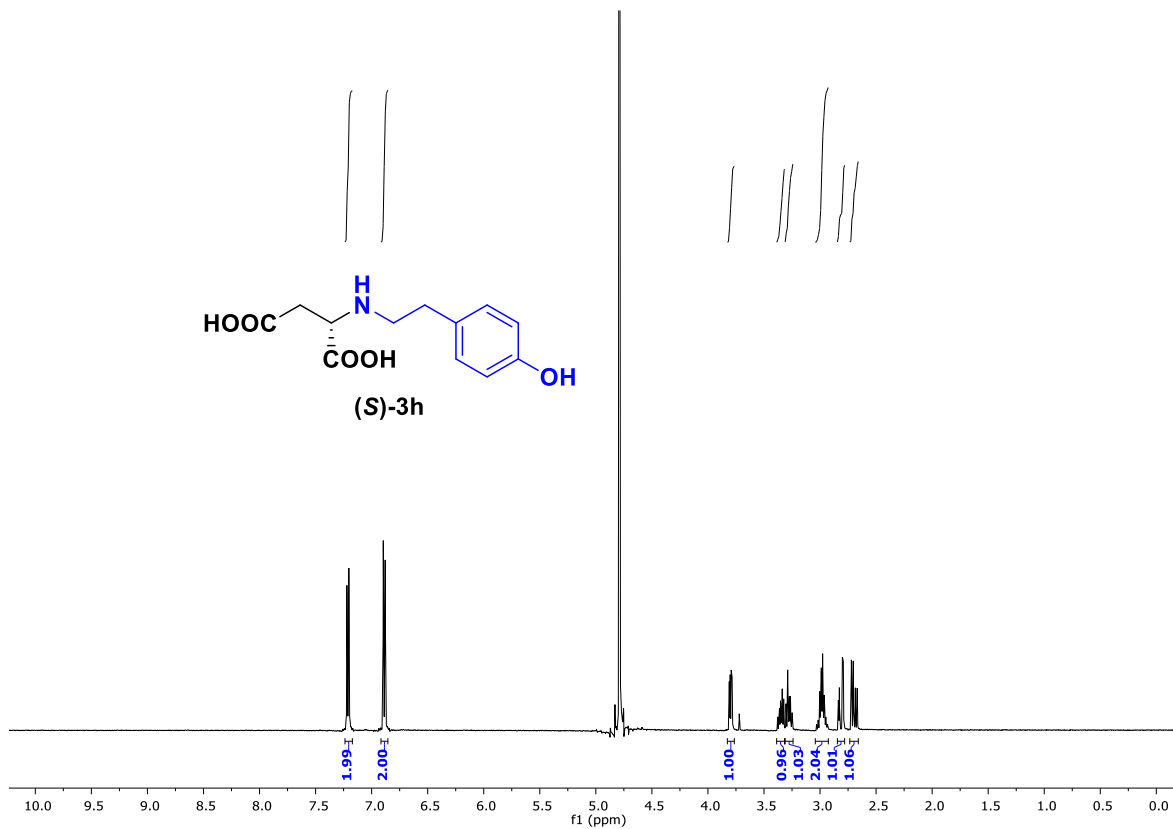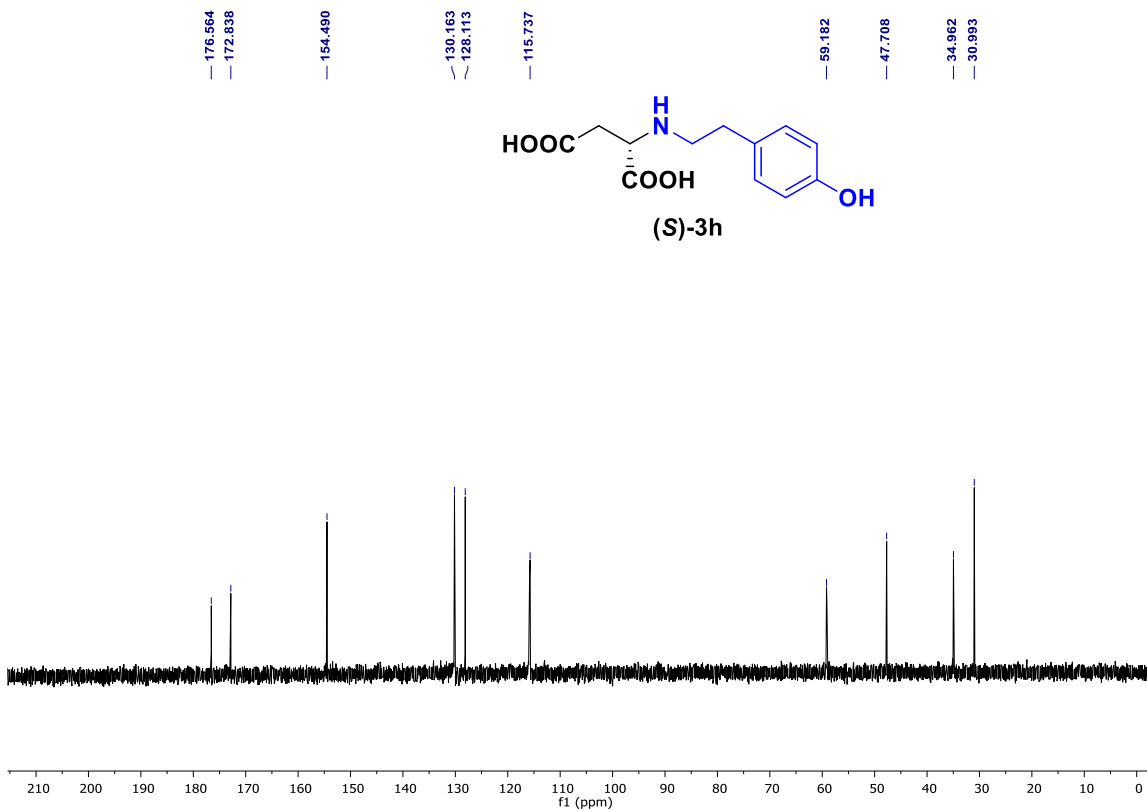

**Figure S26.**  $^1\text{H}$  NMR (top) and  $^{13}\text{C}$  NMR (bottom) of *N*-(4-hydroxyphenethyl)-L-aspartic acid [(S)-3h].

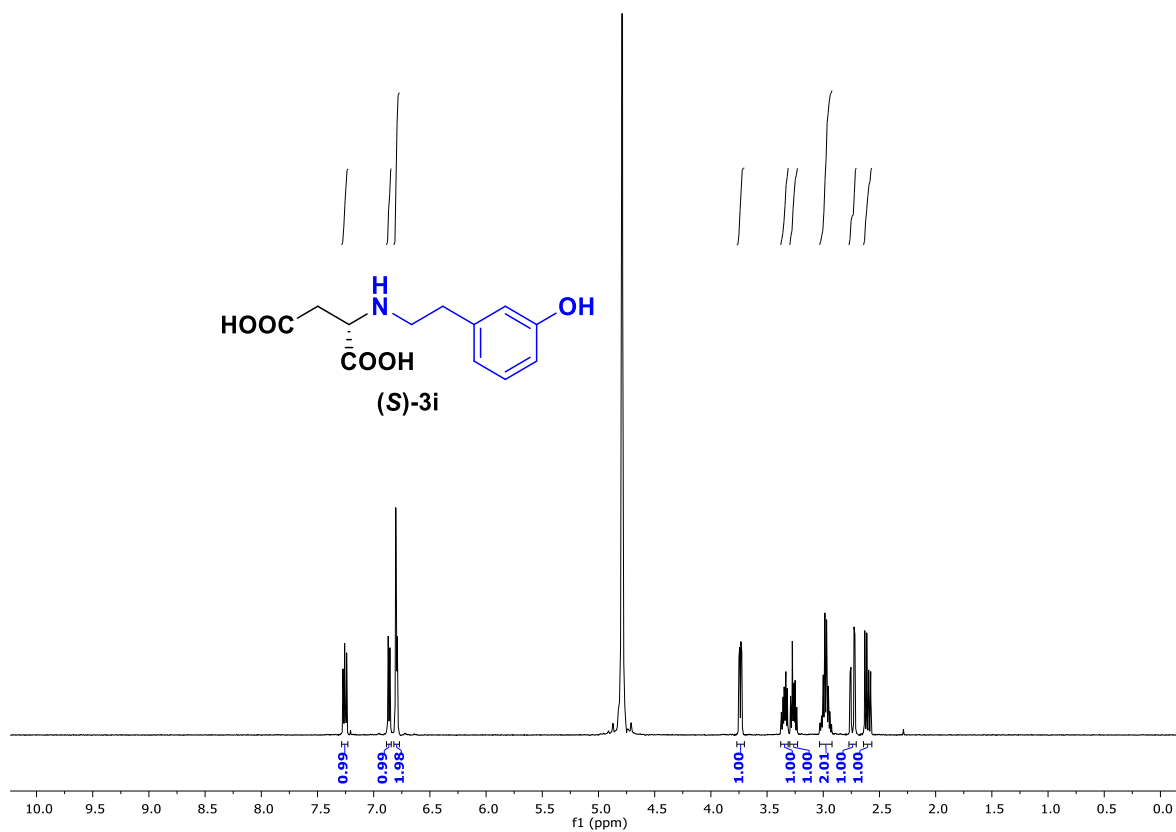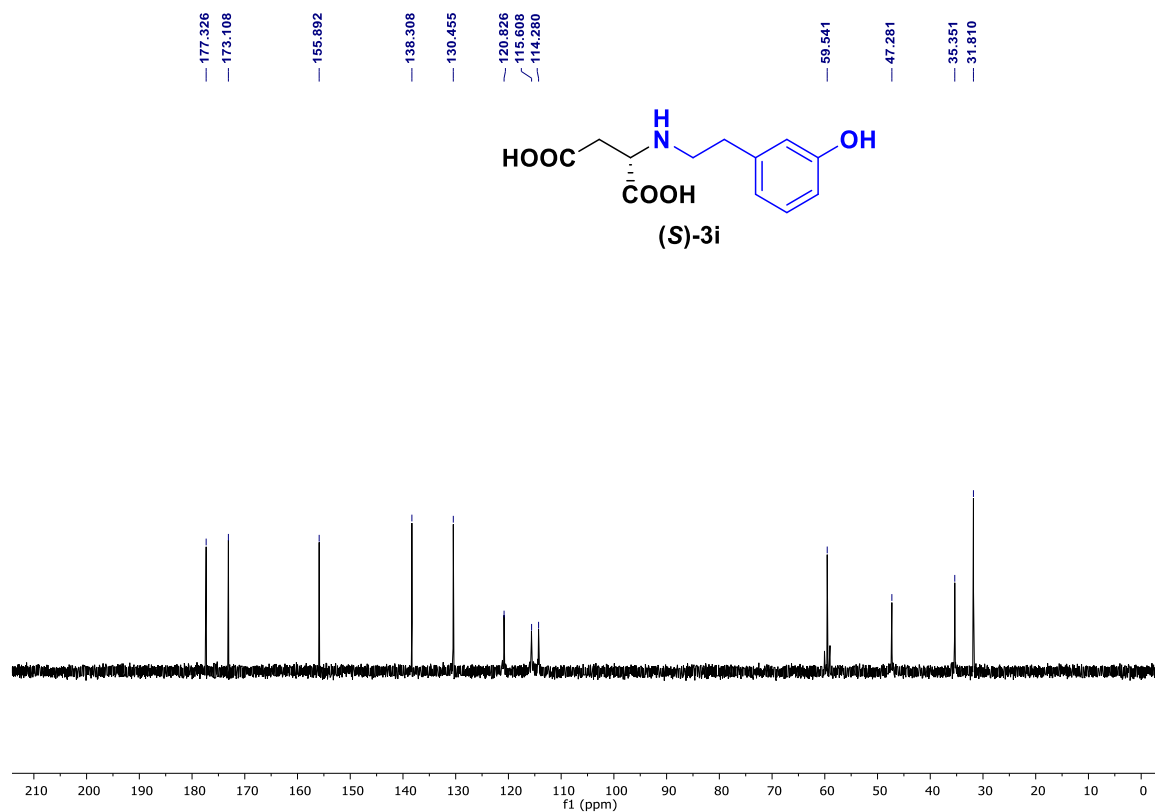

**Figure S27.**  $^1\text{H}$  NMR (top) and  $^{13}\text{C}$  NMR (bottom) of *N*-(3-hydroxyphenethyl)-L-aspartic acid [(S)-3i].

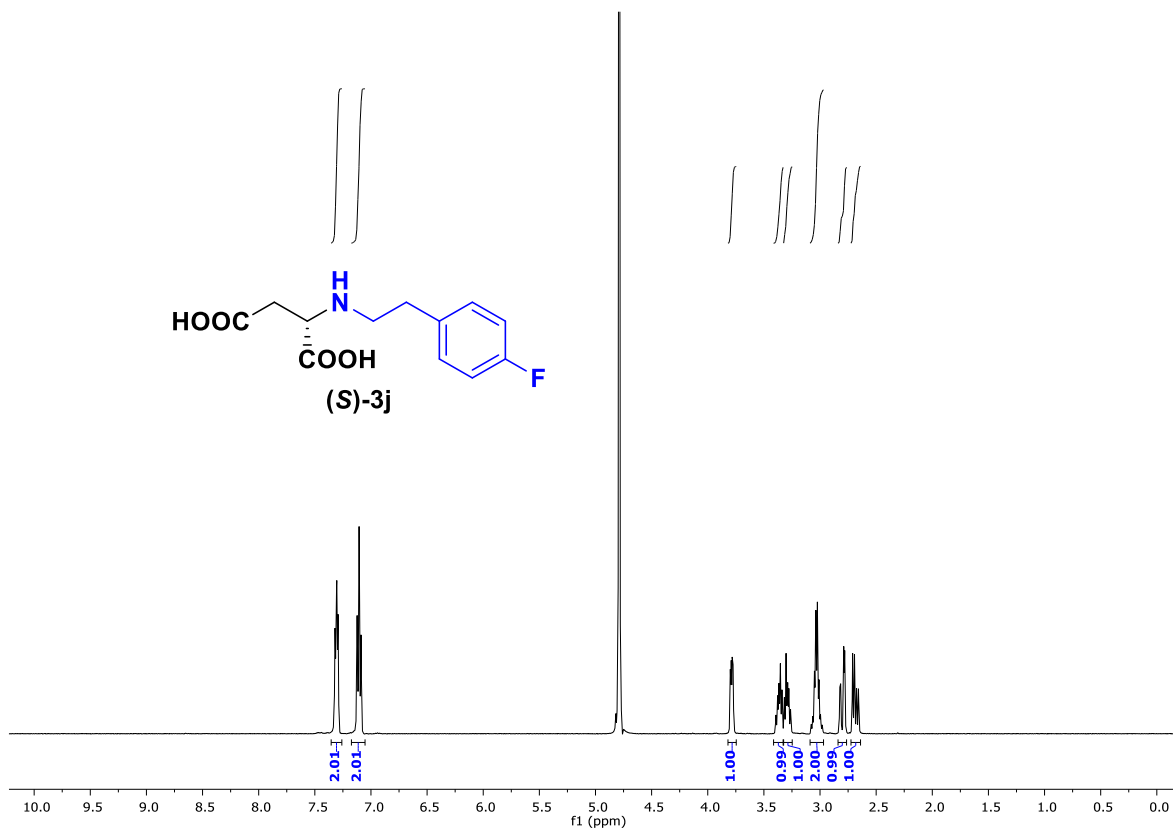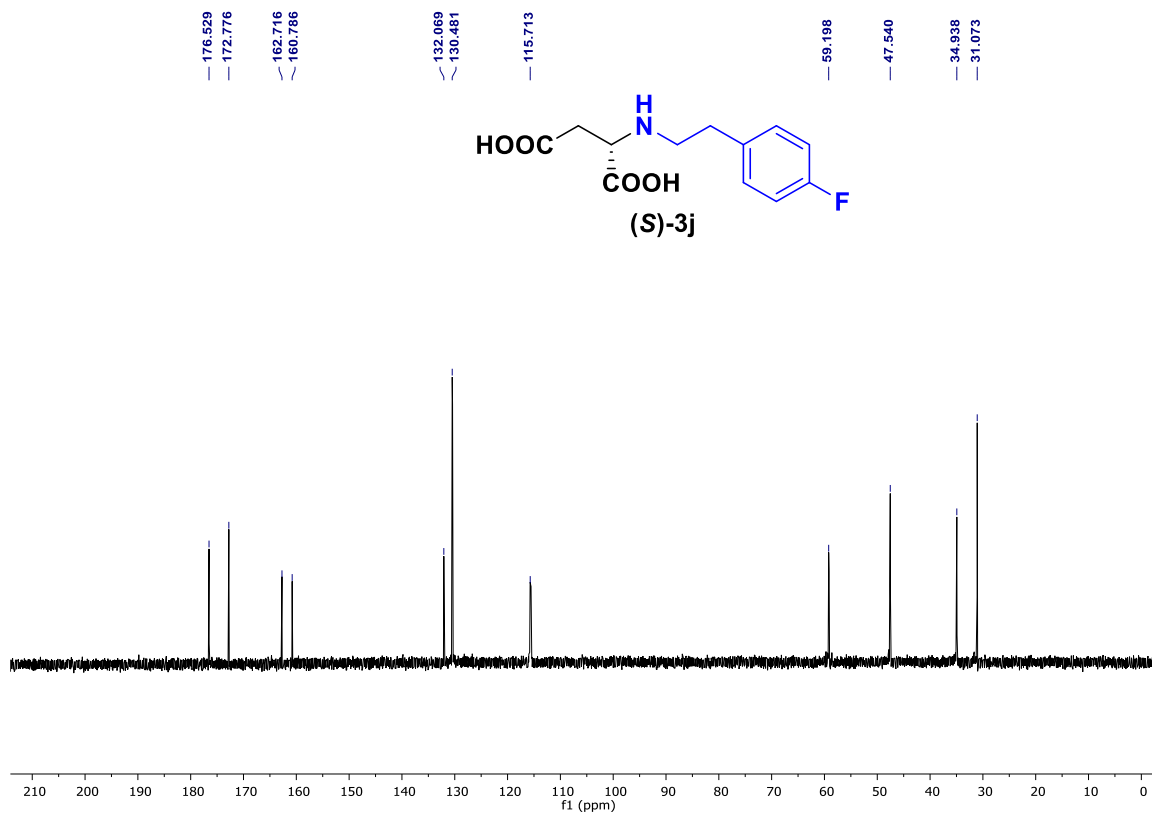

**Figure S28.** <sup>1</sup>H NMR (top) and <sup>13</sup>C NMR (bottom) of *N*-(4-fluorophenethyl)-*L*-aspartic acid [(*S*)-3j].

### 3.2 $^1\text{H}$ and $^{13}\text{C}$ NMR spectra of chemically obtained *N*-arylalkyl-substituted D- and L-aspartic acids

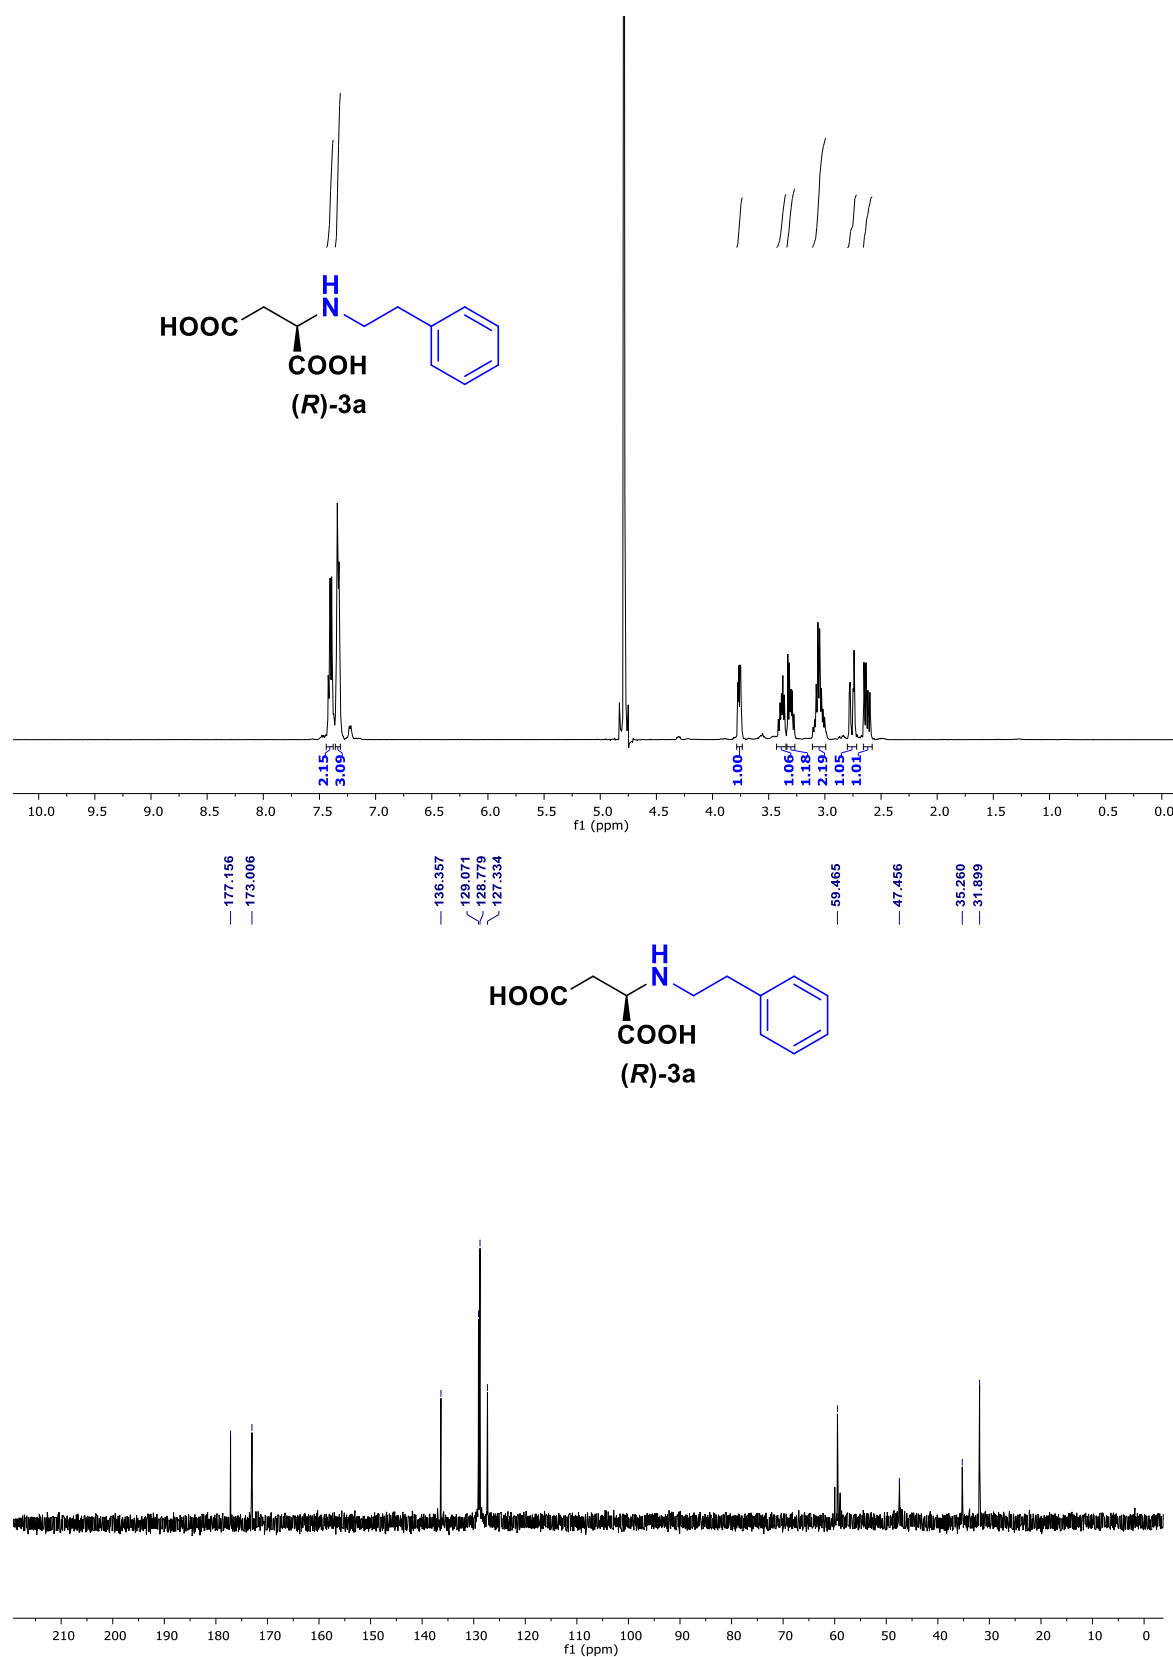

Figure S29.  $^1\text{H}$  NMR (top) and  $^{13}\text{C}$  NMR (bottom) of *N*-(phenethyl)-D-aspartic acid [(*R*)-3a].



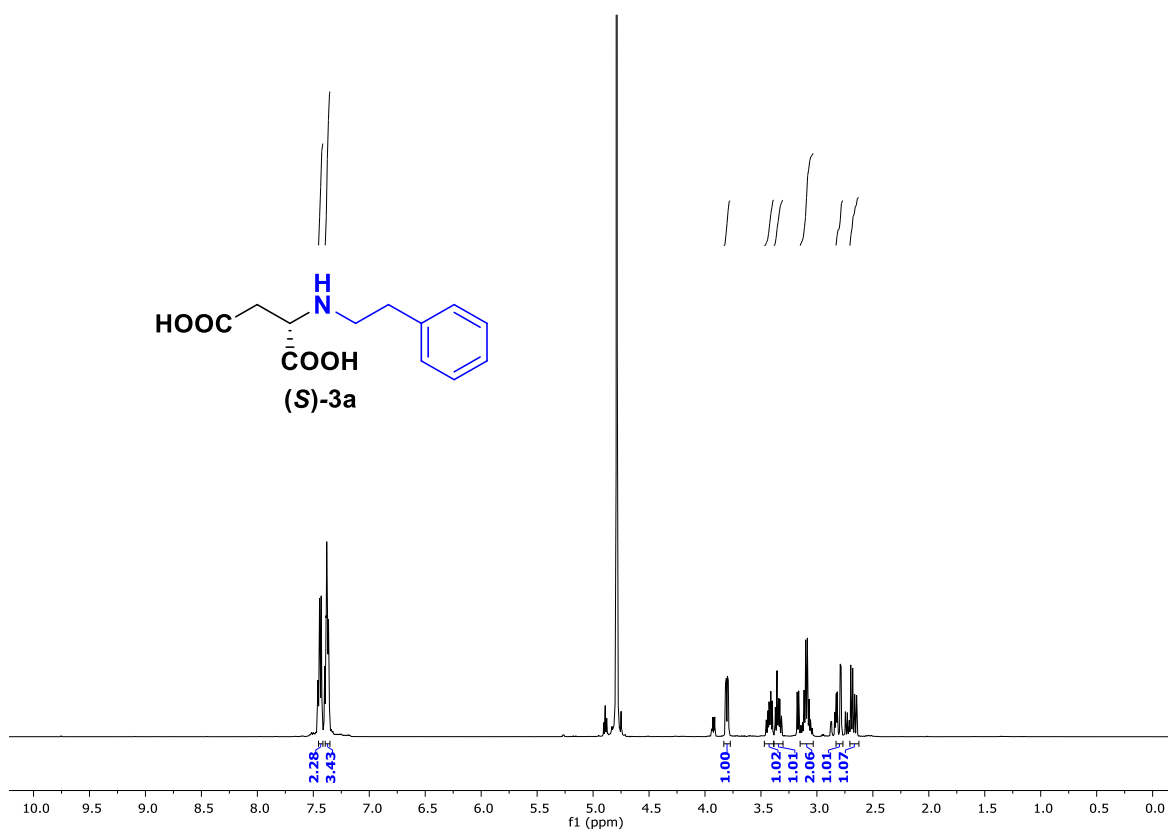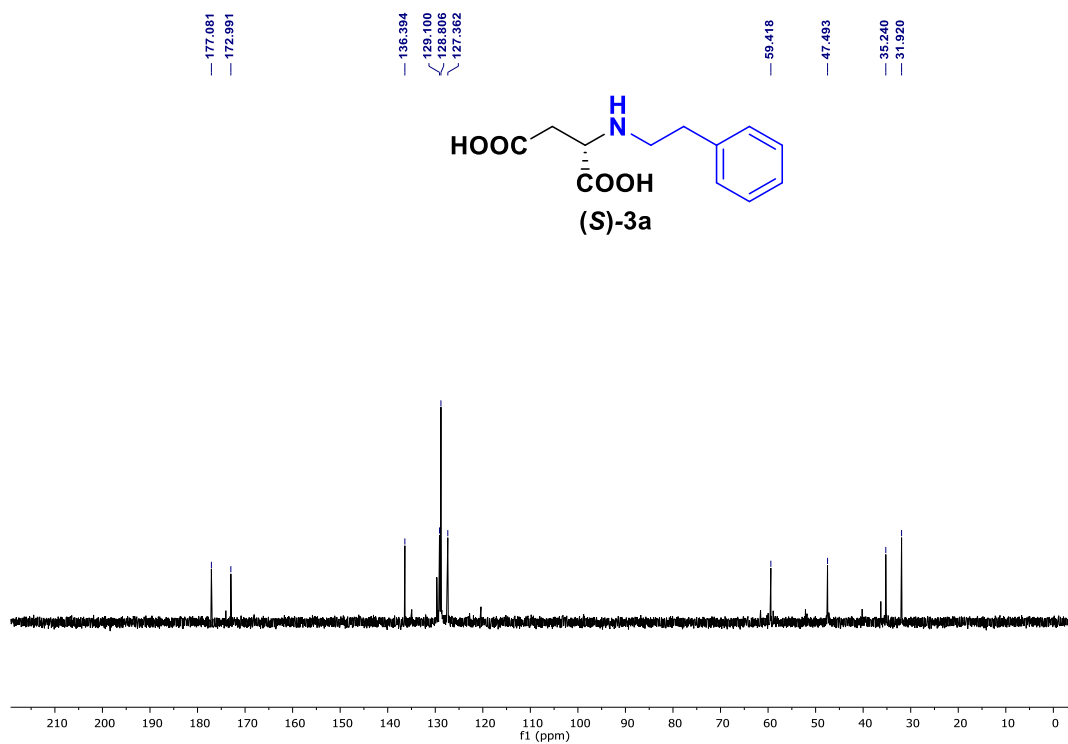

Figure S30. <sup>1</sup>H NMR (top) and <sup>13</sup>C NMR (bottom) of *N*-(phenethyl)-L-aspartic acid [(S)-3a].

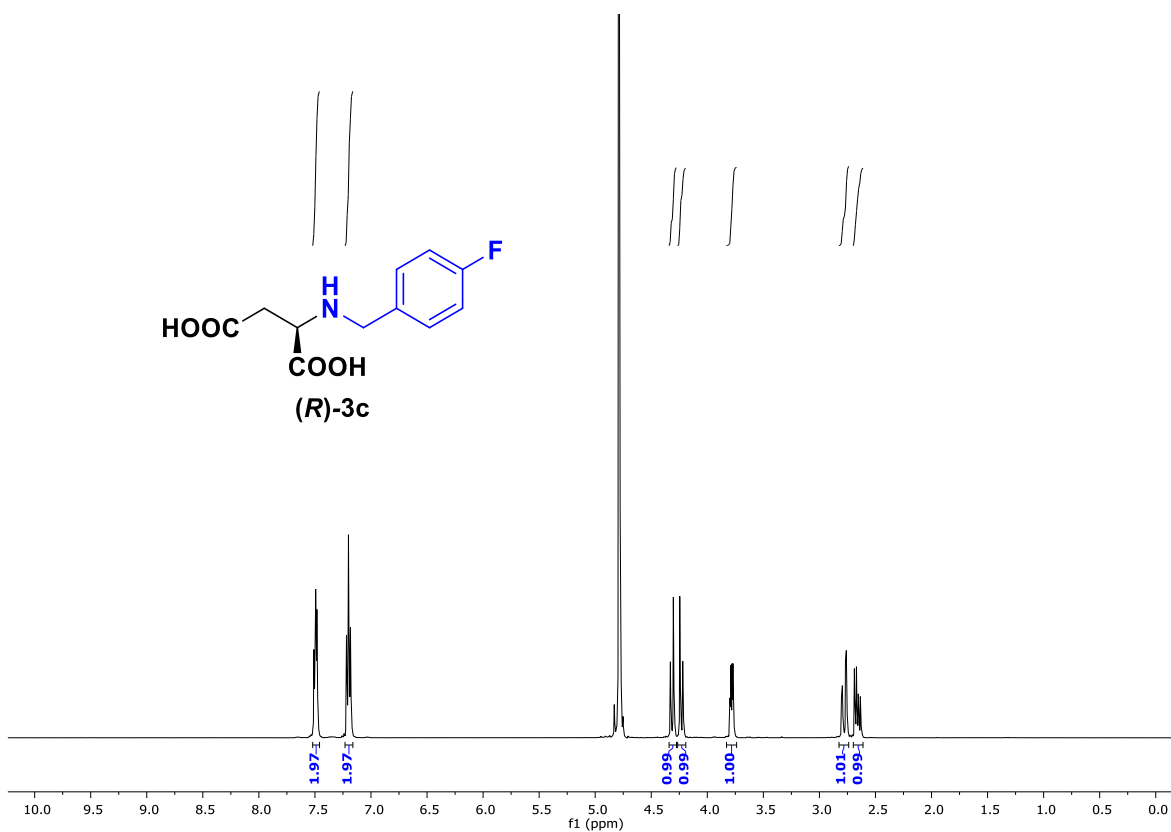

177.138  
172.986  
164.062  
162.105  
131.926  
126.849  
115.946  
58.547  
49.258  
35.577

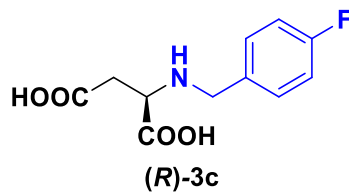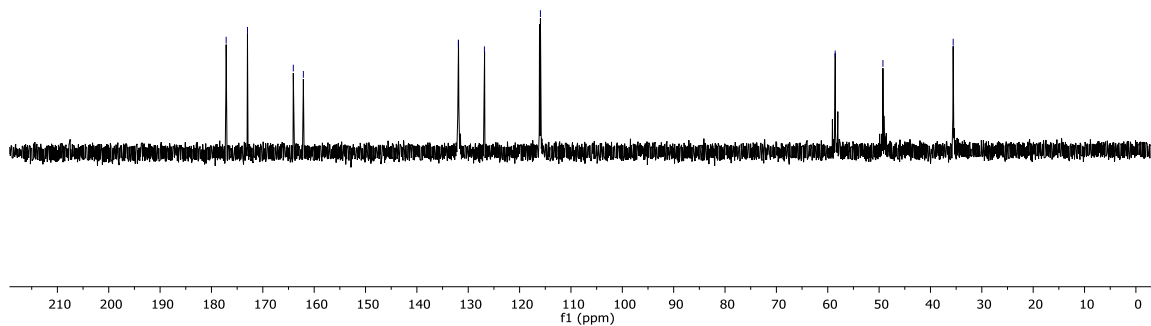

**Figure S31.** <sup>1</sup>H NMR (top) and <sup>13</sup>C NMR (bottom) of *N*-(4-fluorobenzyl)-D-aspartic acid [(*R*)-3c].

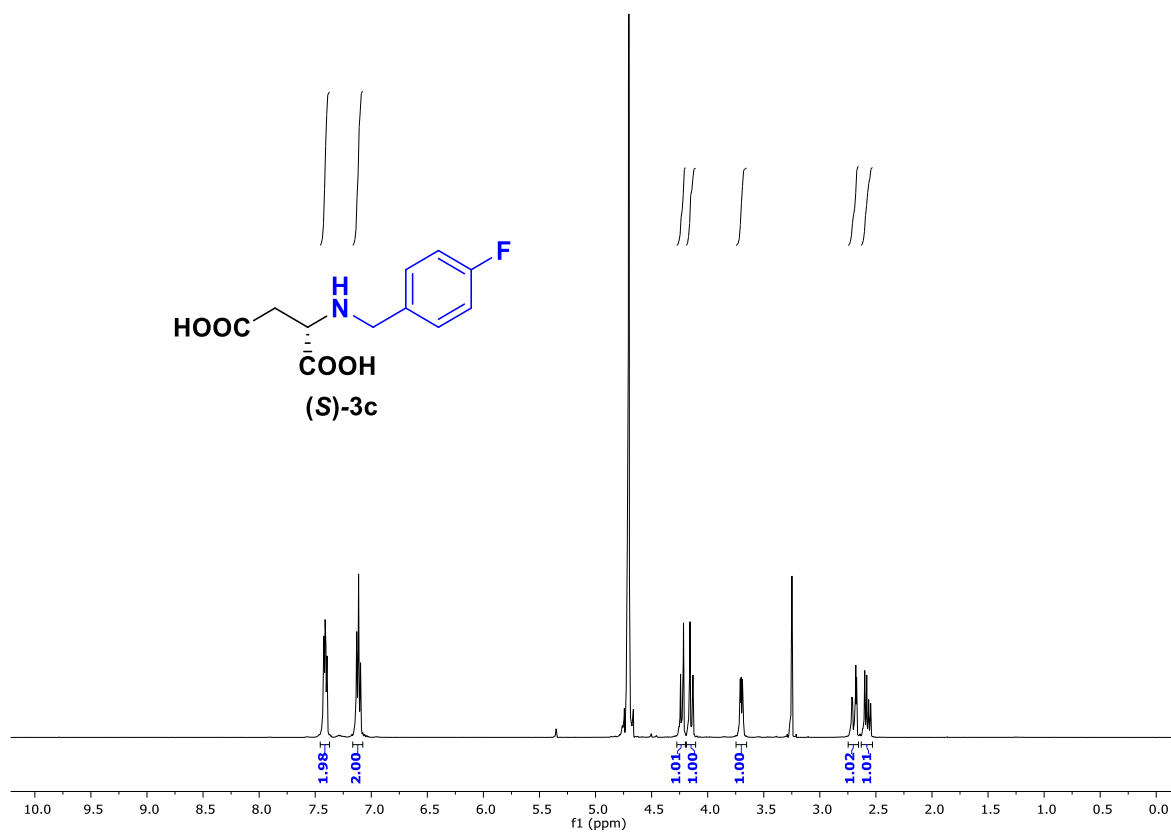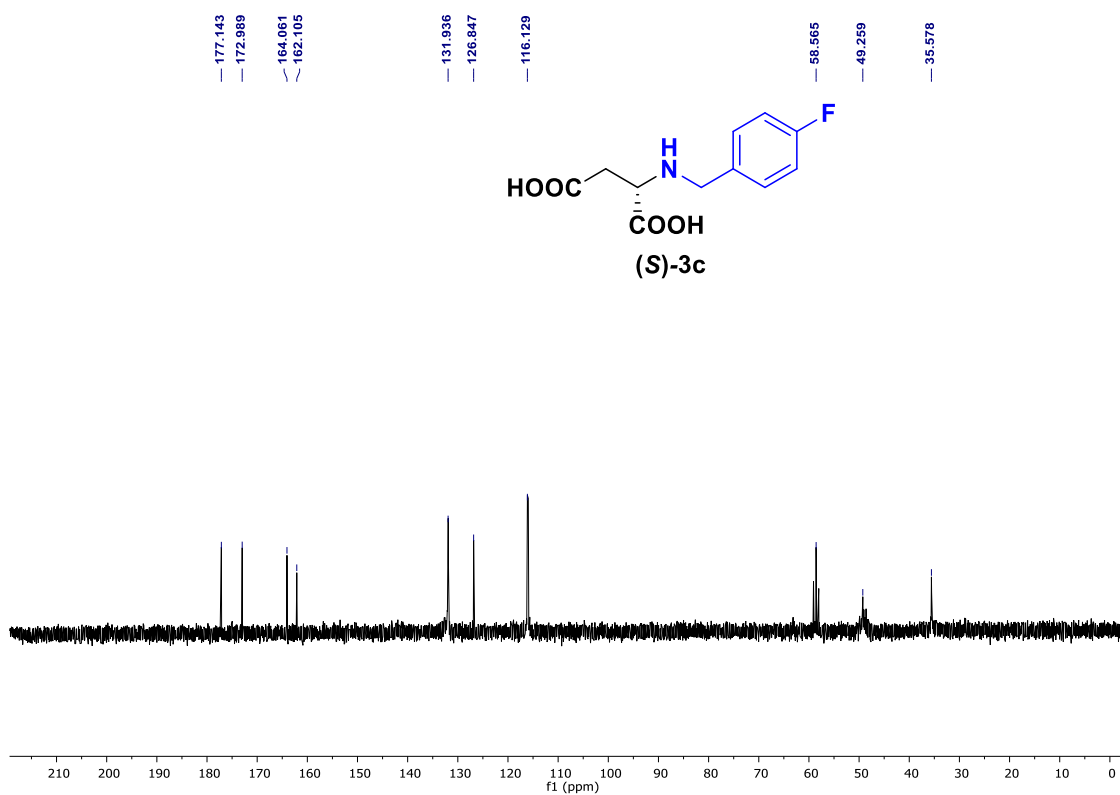

**Figure S32.** <sup>1</sup>H NMR (top) and <sup>13</sup>C NMR (bottom) of *N*-(4-fluorobenzyl)-L-aspartic acid [(*S*)-3c].

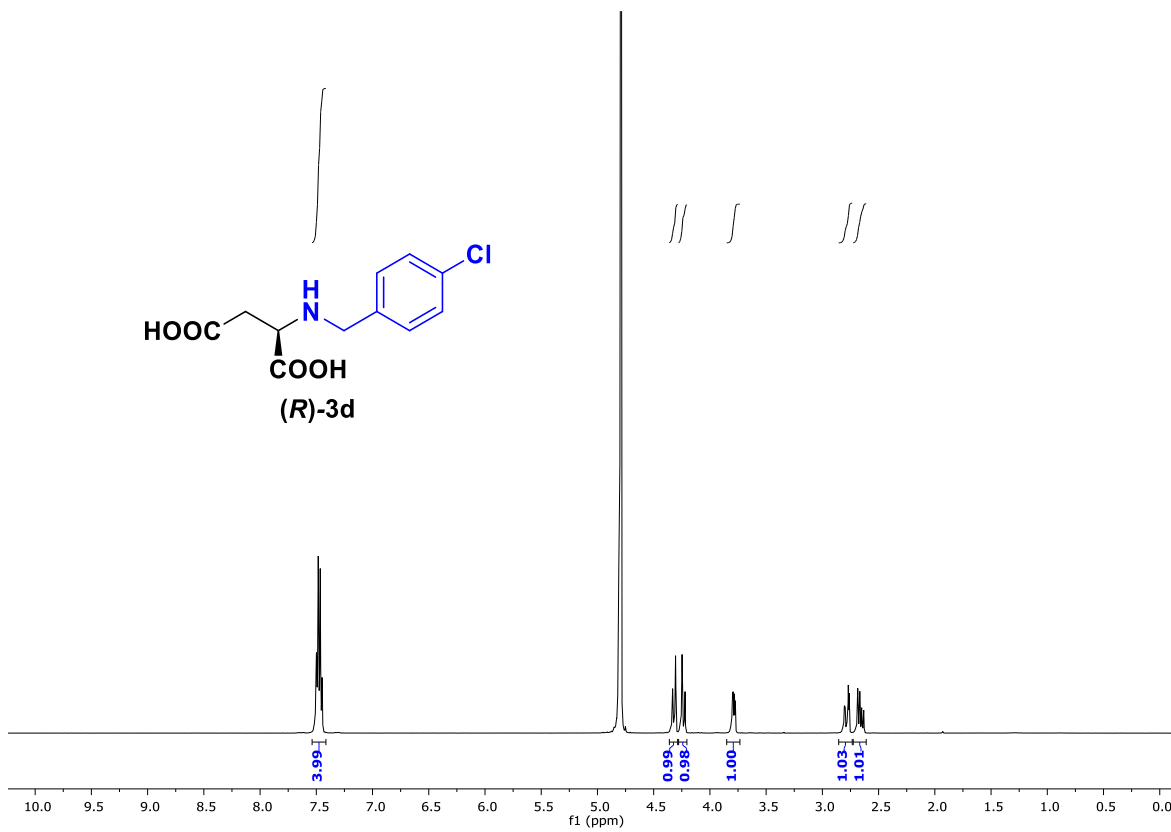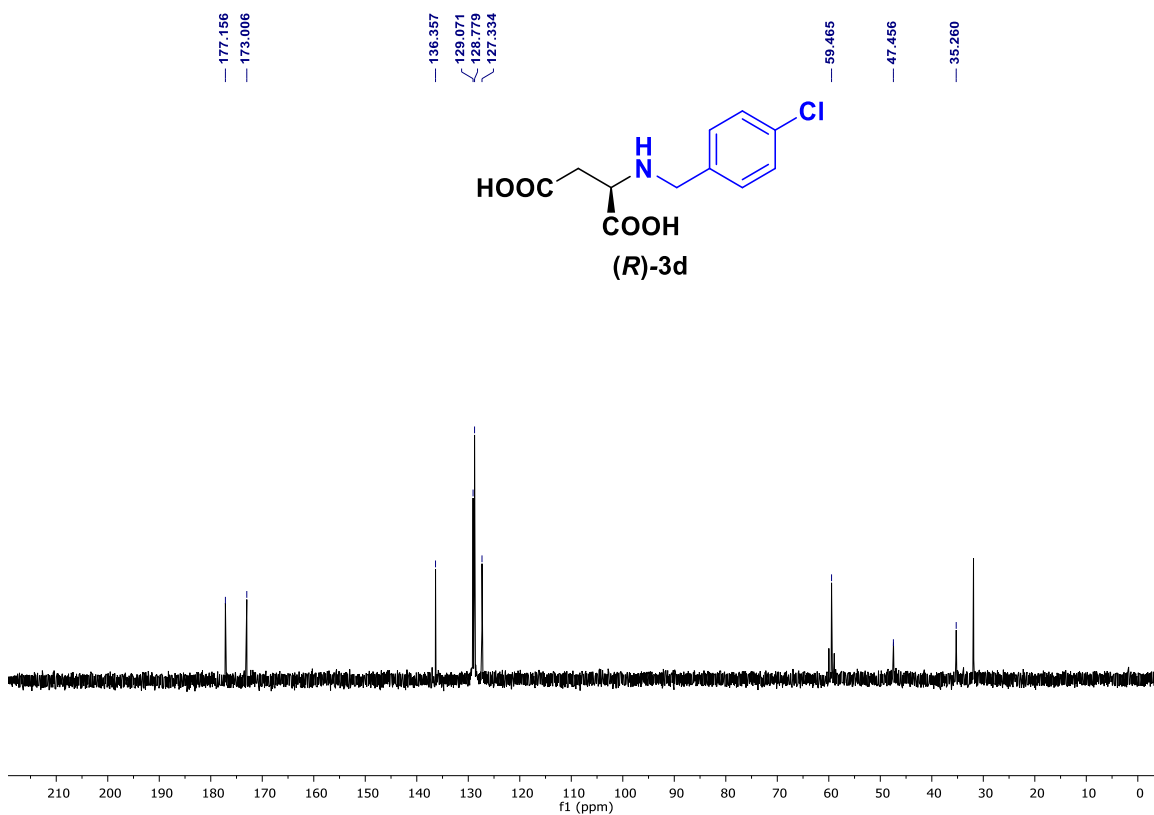

**Figure S33.** <sup>1</sup>H NMR (top) and <sup>13</sup>C NMR (bottom) of *N*-(4-chlorobenzyl)-D-aspartic acid [(*R*)-3d].

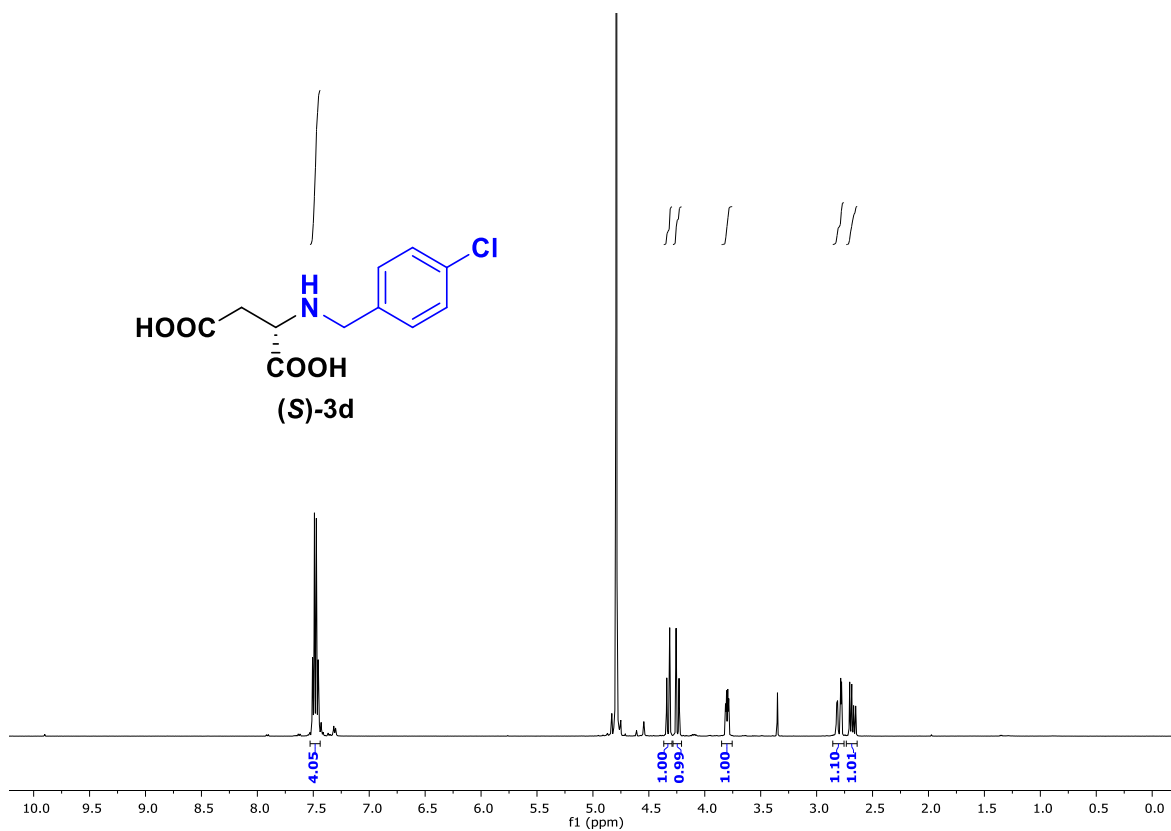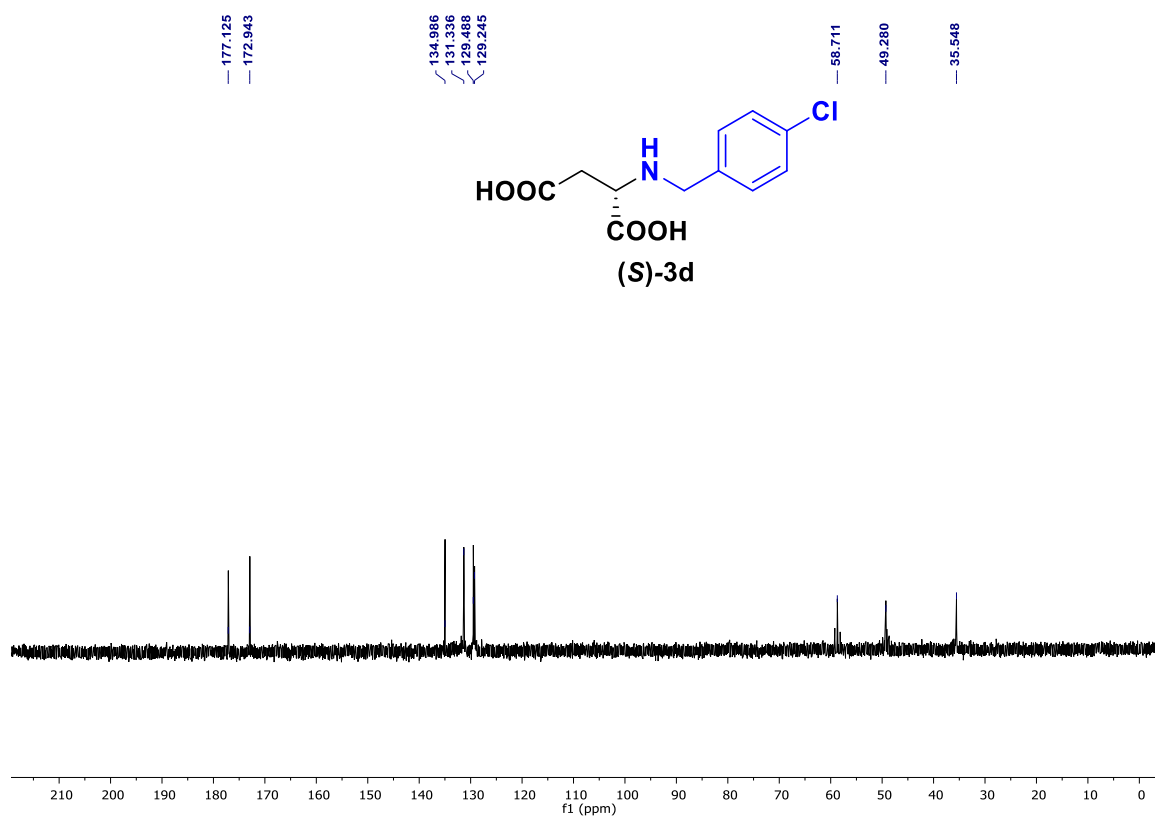

Figure S34. <sup>1</sup>H NMR (top) and <sup>13</sup>C NMR (bottom) of *N*-(4-chlorobenzyl)-L-aspartic acid [(*S*)-3d].

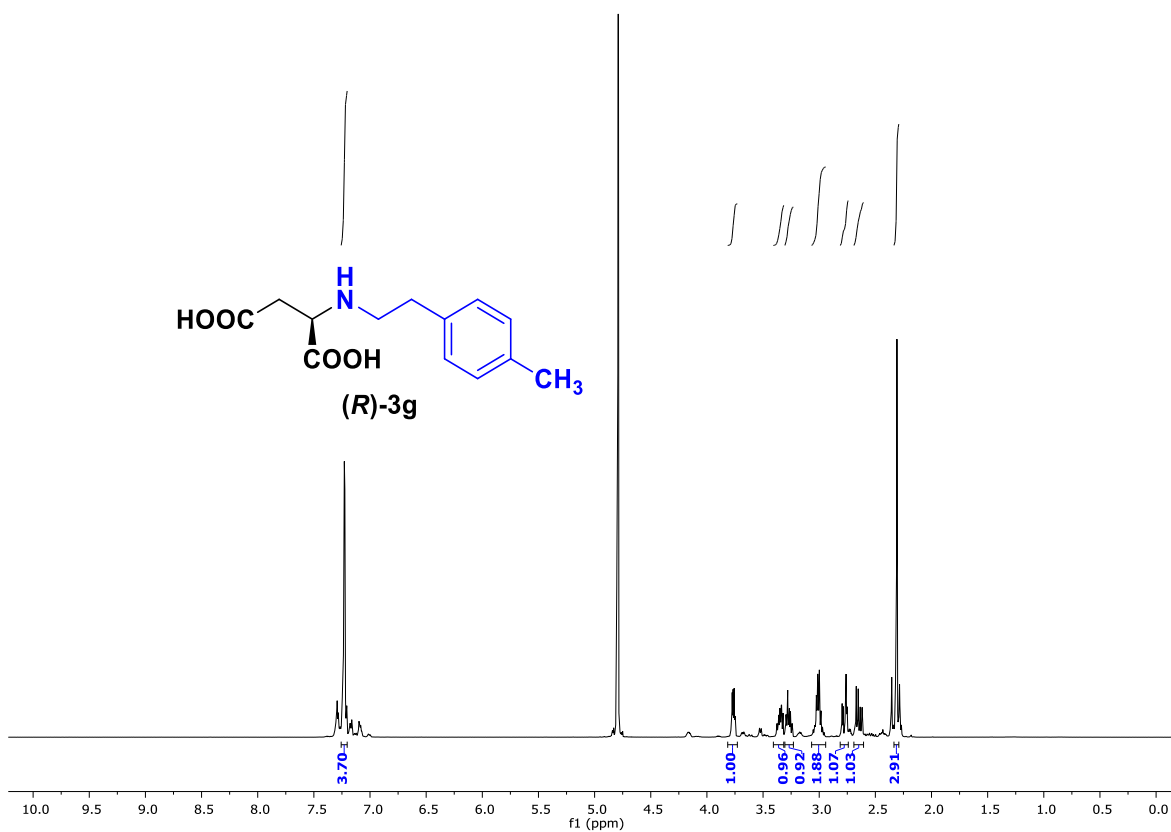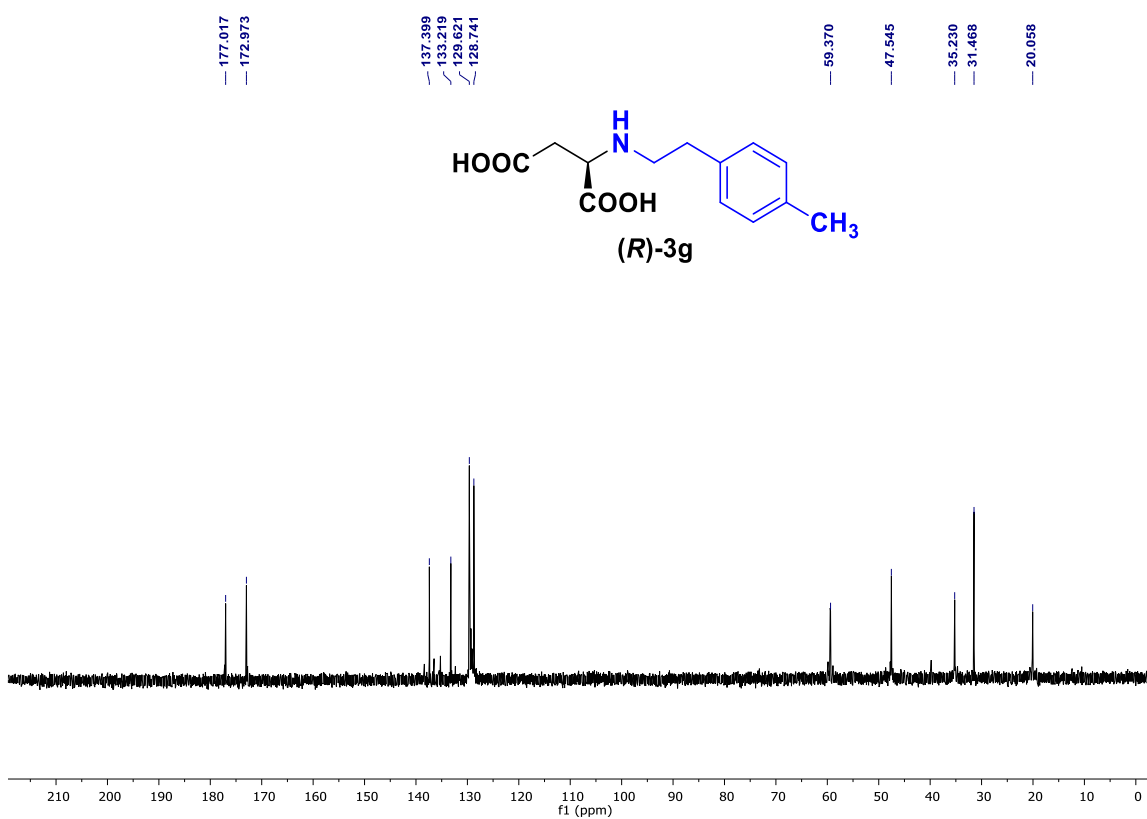

**Figure S35.** <sup>1</sup>H NMR (top) and <sup>13</sup>C NMR (bottom) of *N*-(4-methylphenethyl)-*D*-aspartic acid [(*R*)-3g].

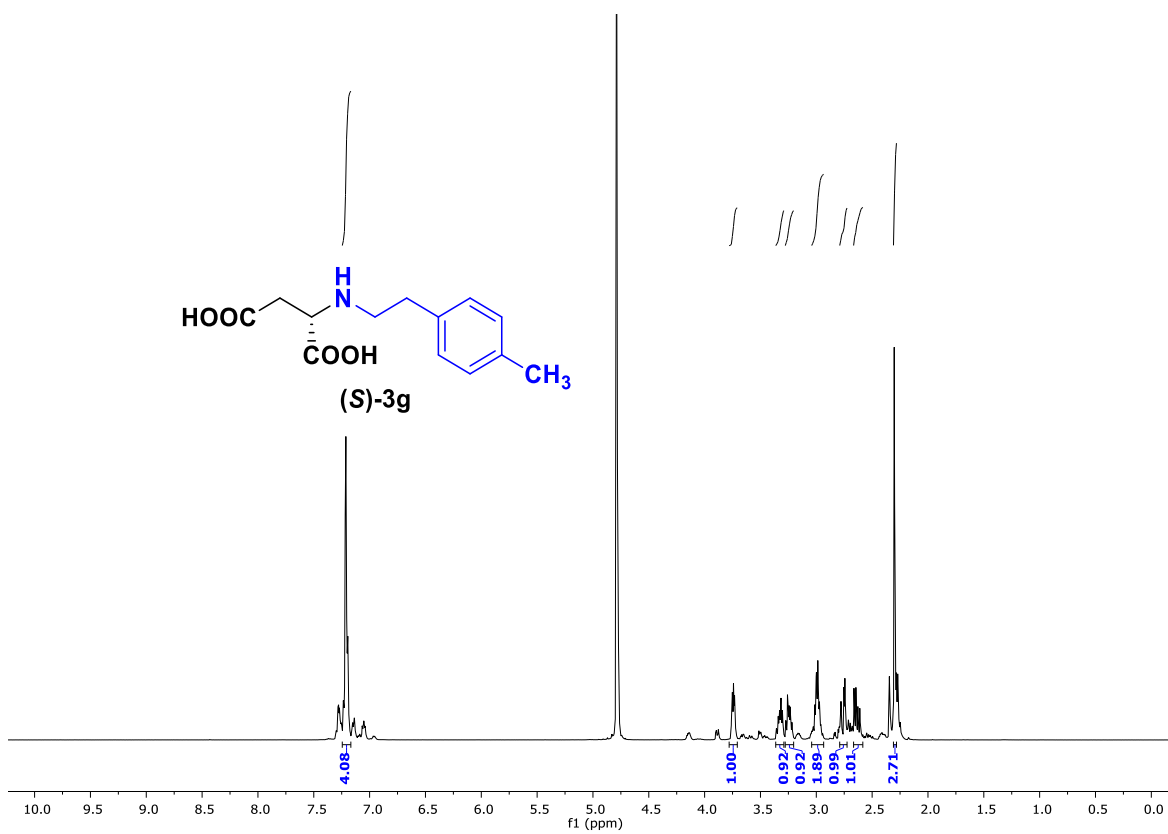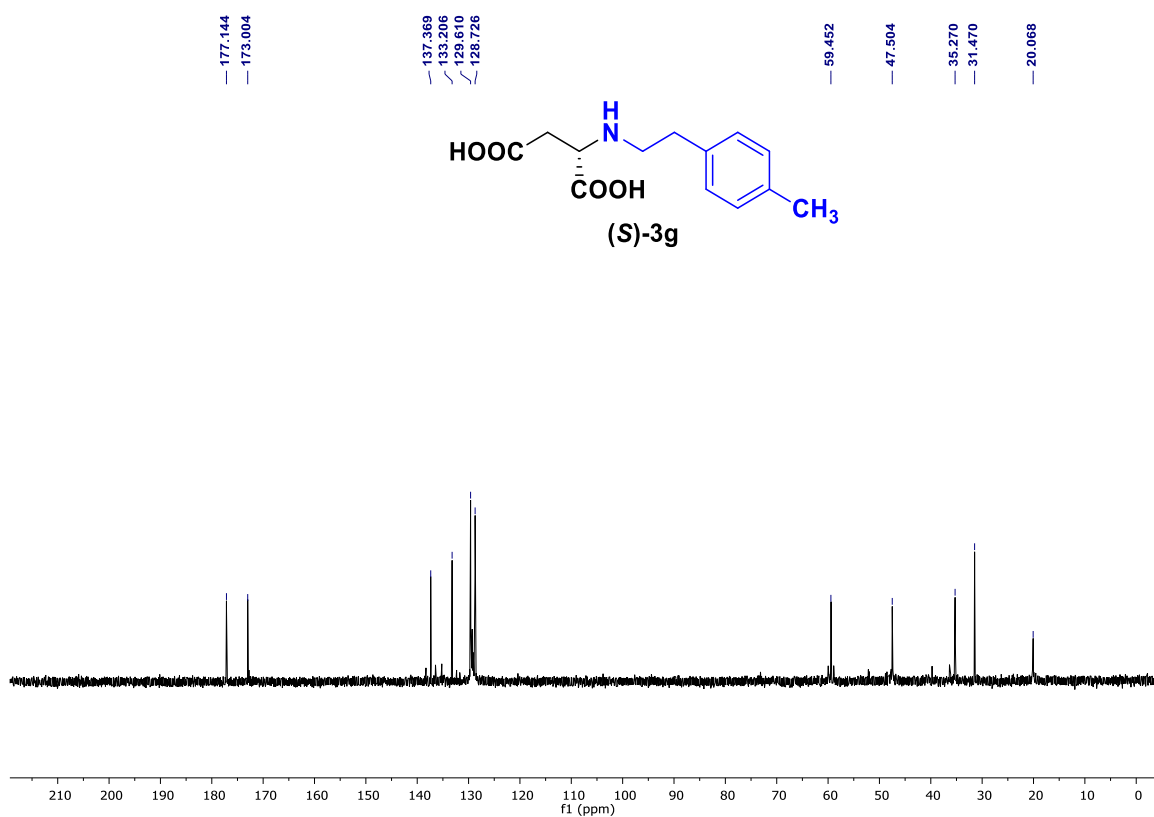

**Figure S36.** <sup>1</sup>H NMR (top) and <sup>13</sup>C NMR (bottom) of *N*-(4-methylphenethyl)-L-aspartic acid [(*S*)-3g].

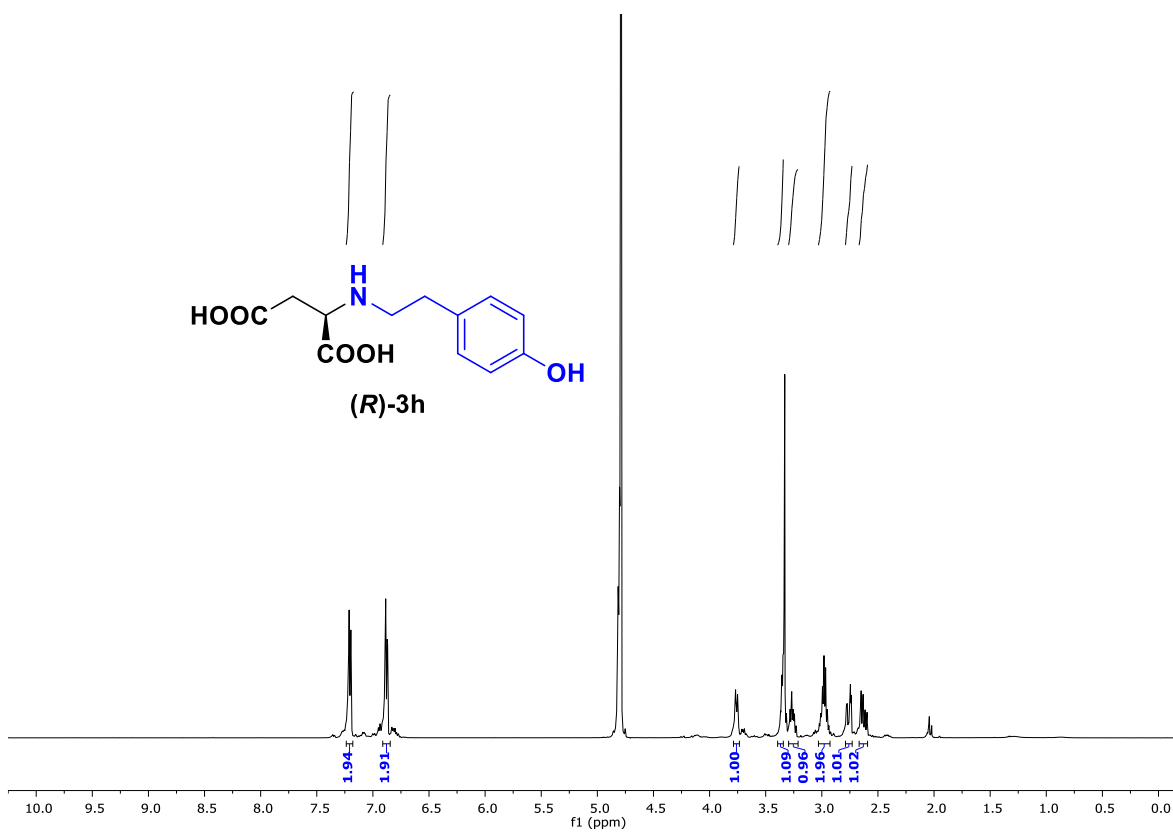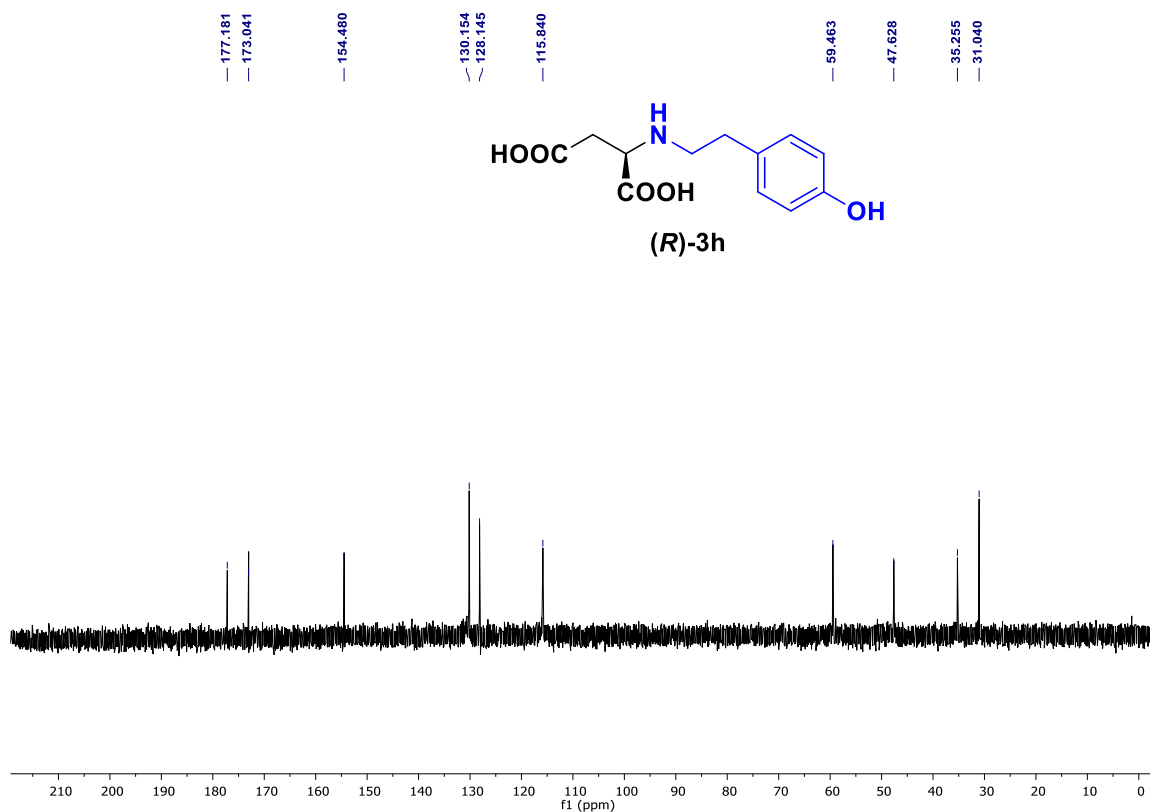

**Figure S37.** <sup>1</sup>H NMR (top) and <sup>13</sup>C NMR (bottom) of *N*-(4-hydroxyphenethyl)-D-aspartic acid [(*R*)-3h].



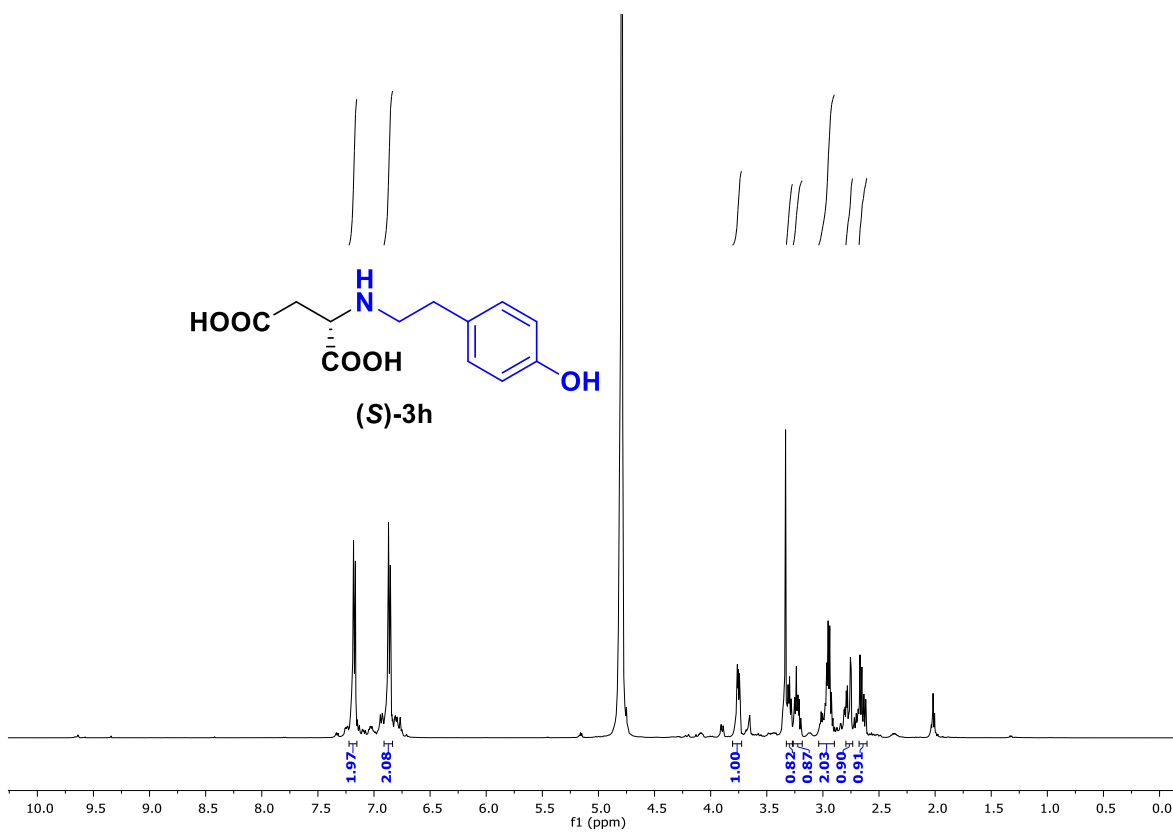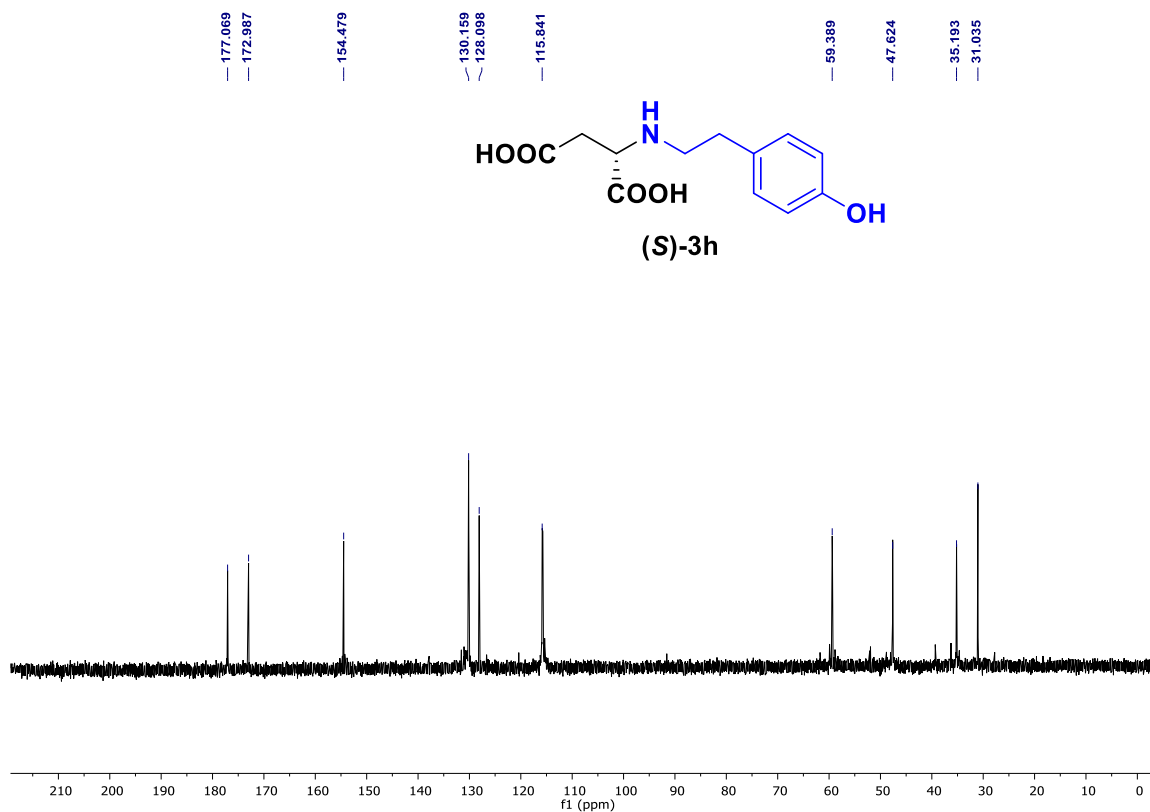

**Figure S38.** <sup>1</sup>H NMR (top) and <sup>13</sup>C NMR (bottom) of *N*-(4-hydroxyphenethyl)-L-aspartic acid [(S)-3h].

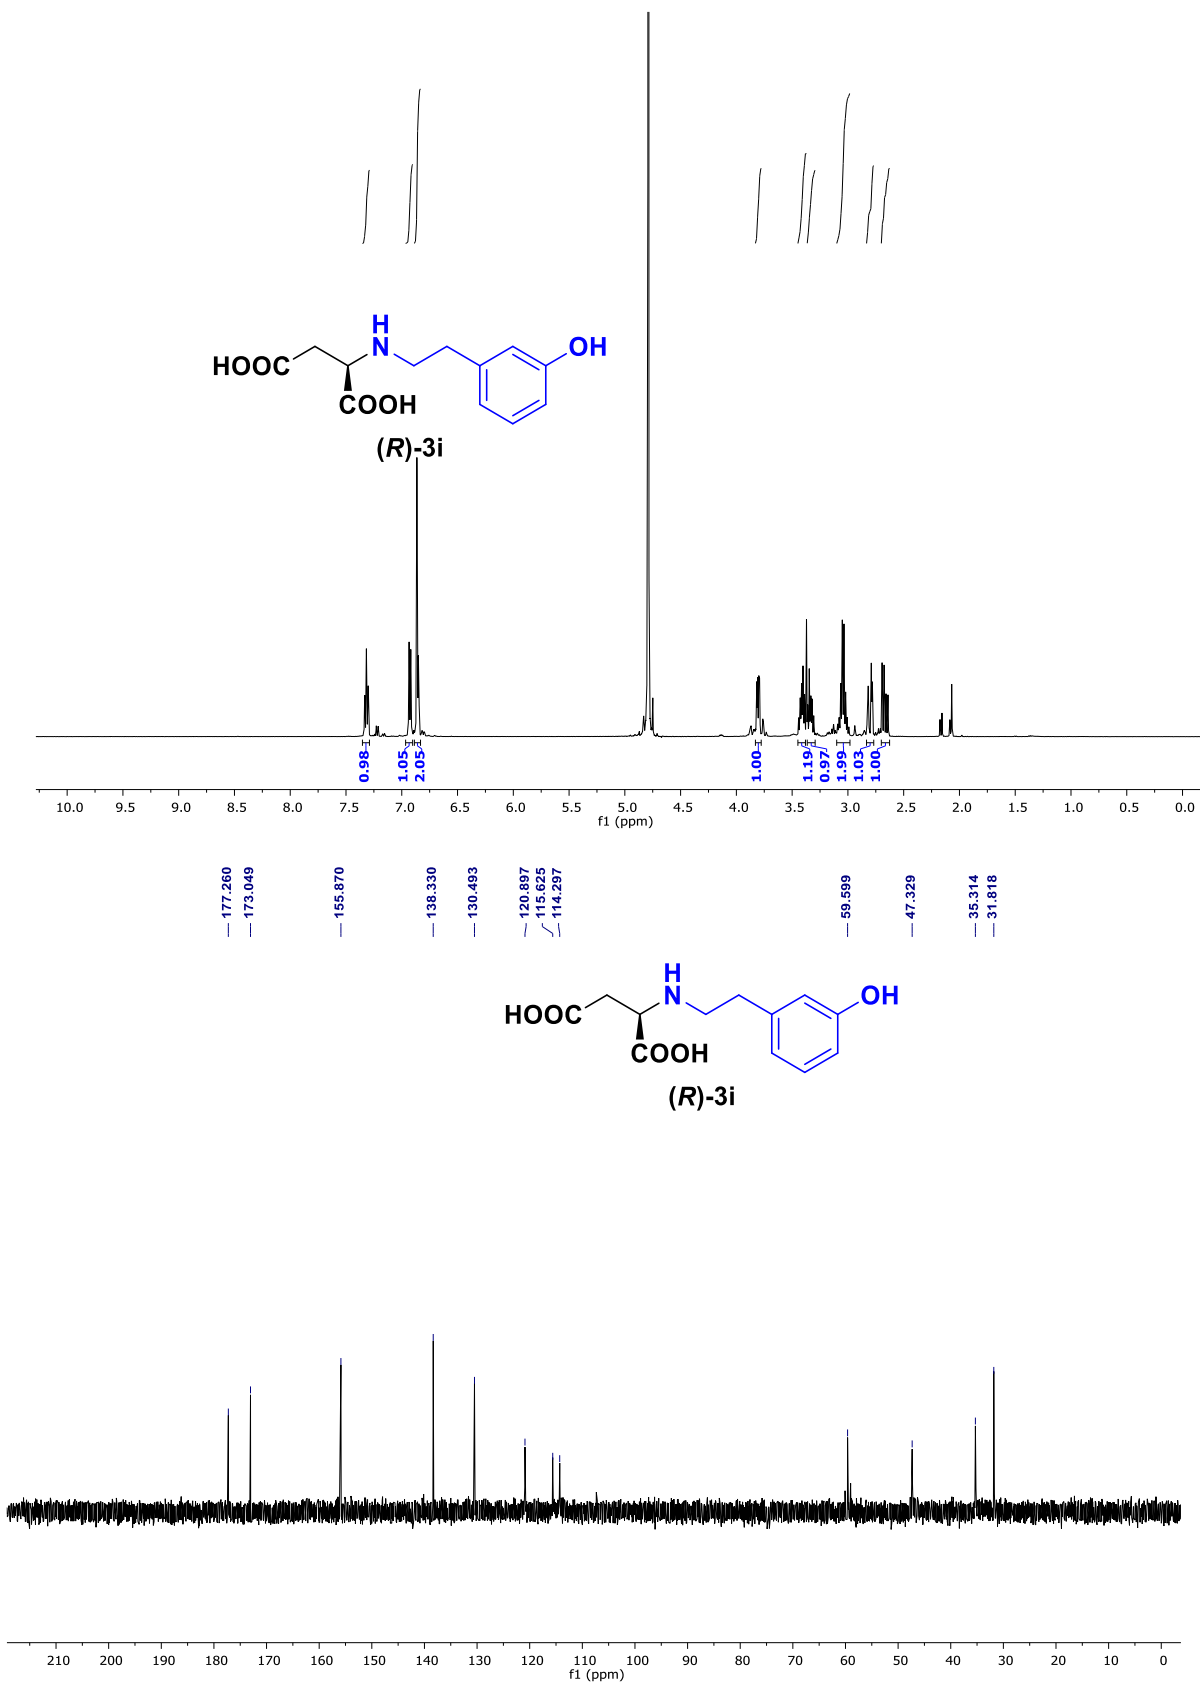

**Figure S39.** <sup>1</sup>H NMR (top) and <sup>13</sup>C NMR (bottom) of *N*-(3-hydroxyphenethyl)-D-aspartic acid [(*R*)-3i].

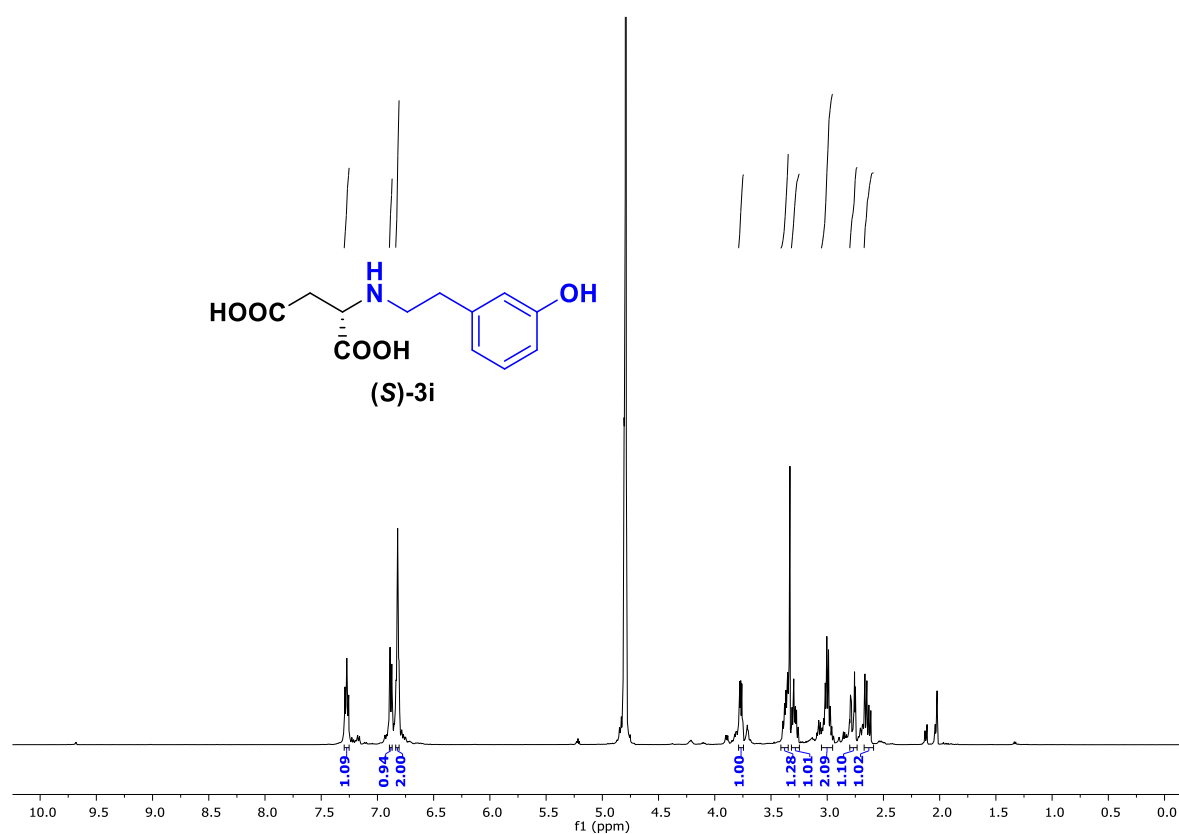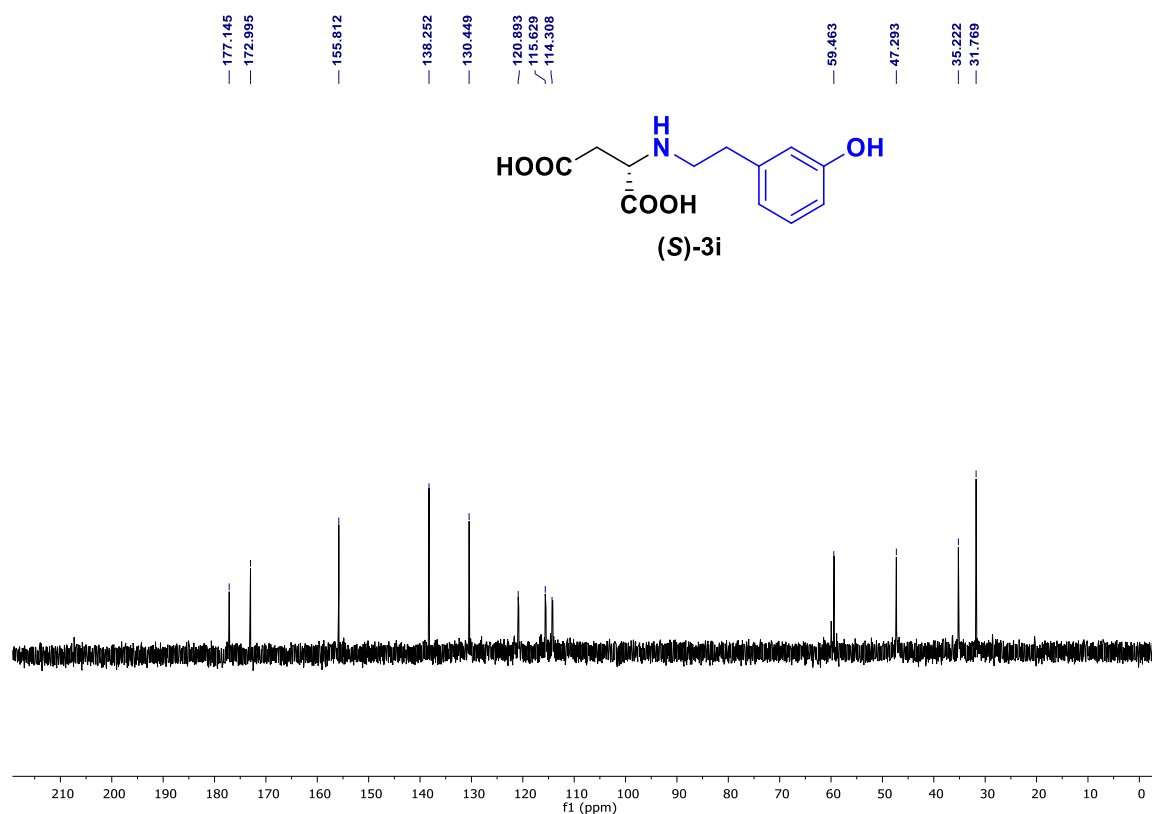

**Figure S40.** <sup>1</sup>H NMR (top) and <sup>13</sup>C NMR (bottom) of *N*-(3-hydroxyphenethyl)-L-aspartic acid [(S)-3i].

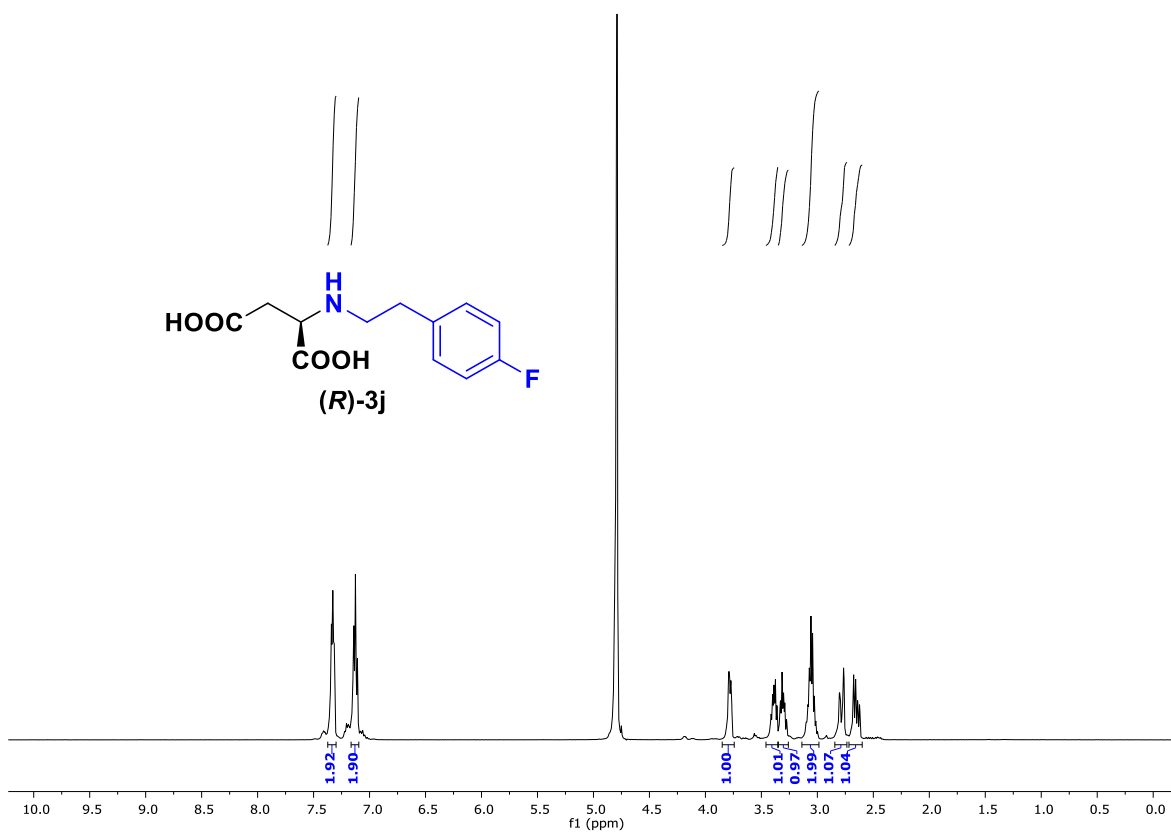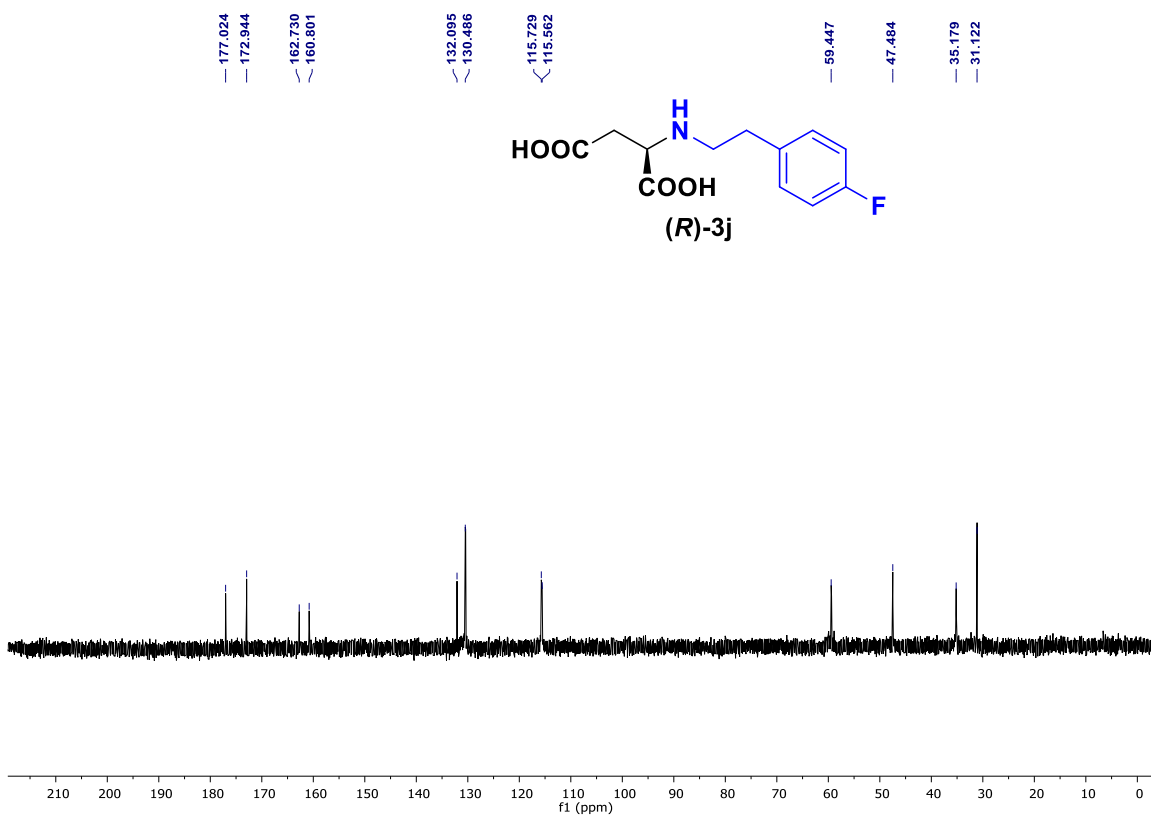

**Figure S41.** <sup>1</sup>H NMR (top) and <sup>13</sup>C NMR (bottom) of *N*-(4-fluorophenethyl)-*D*-aspartic acid [(*R*)-3j].

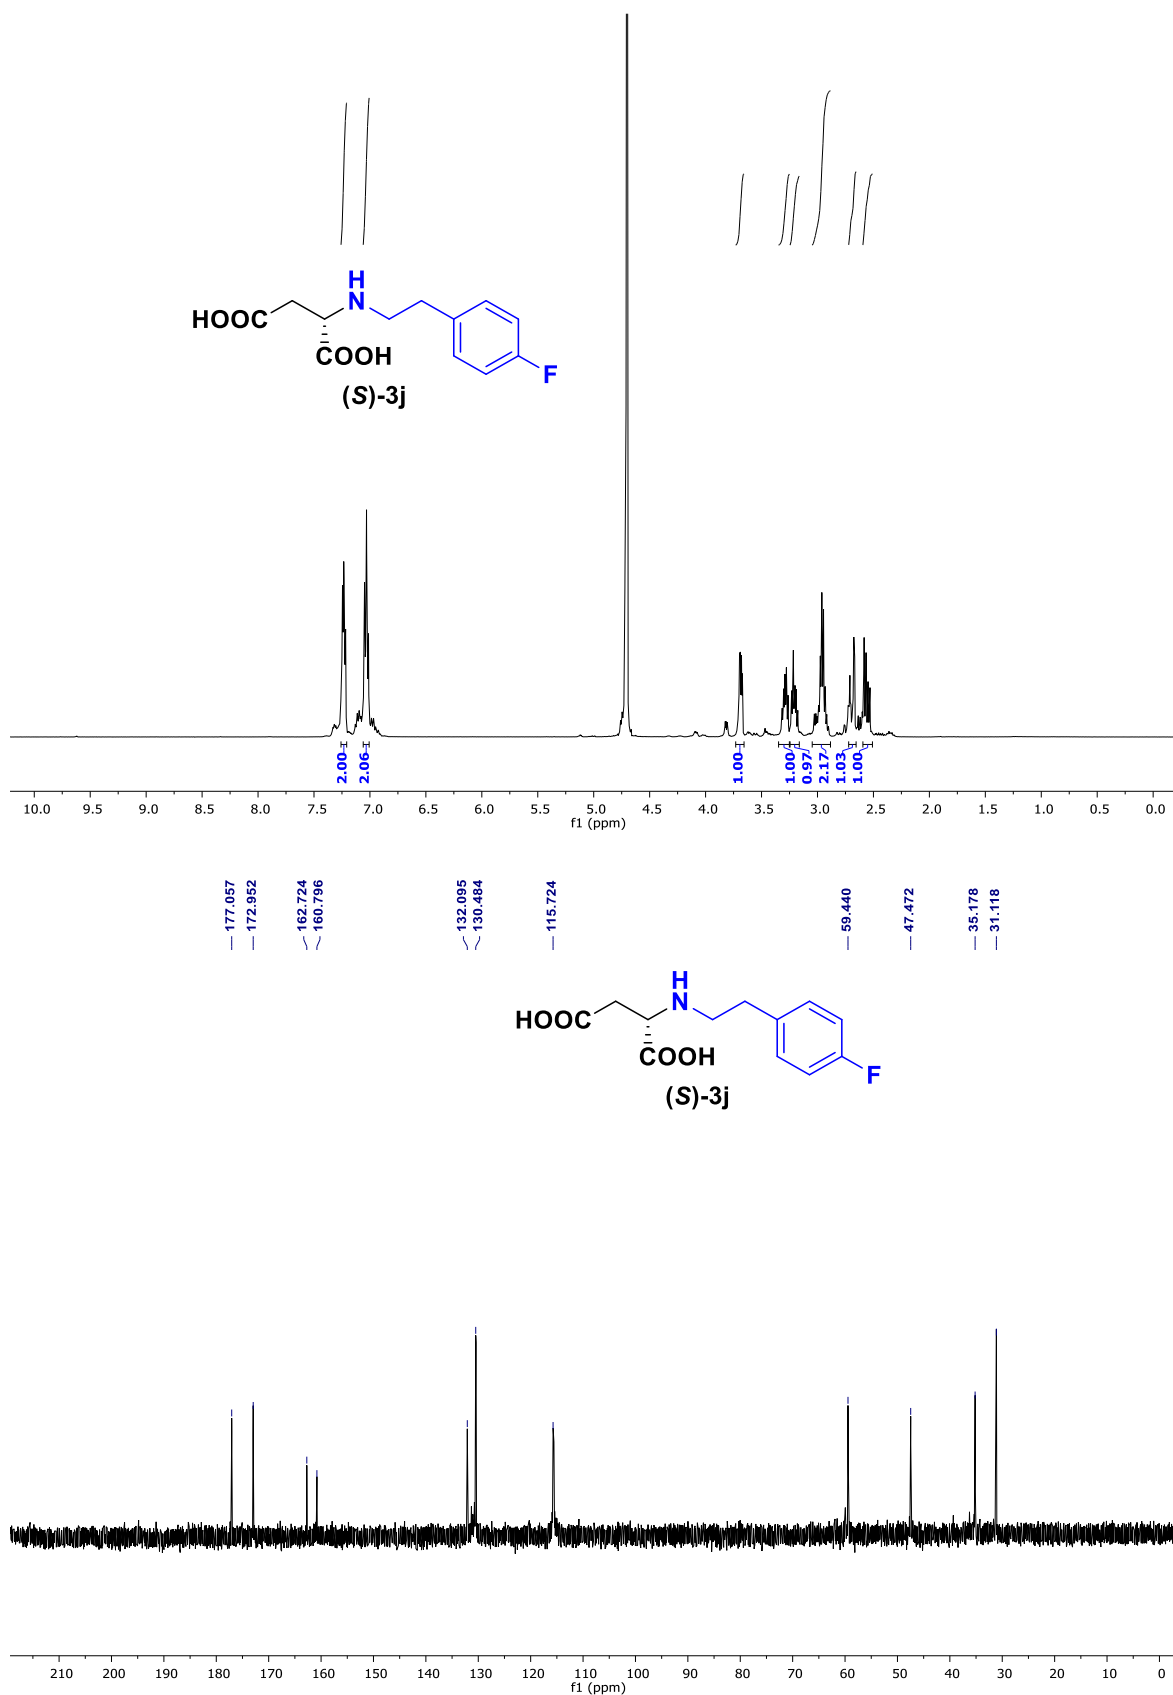

**Figure S42.** <sup>1</sup>H NMR (top) and <sup>13</sup>C NMR (bottom) of *N*-(4-fluorophenethyl)-L-aspartic acid [(*S*)-3j].

#### 4. LC-HRMS analysis

### LC-HRMS data of enzymatically obtained *N*-arylalkyl-substituted L-aspartic acids

C:\Xcalibur...\18mdv166-sample2

6/8/2018 1:39:01 PM

RT: 0.00 - 9.99

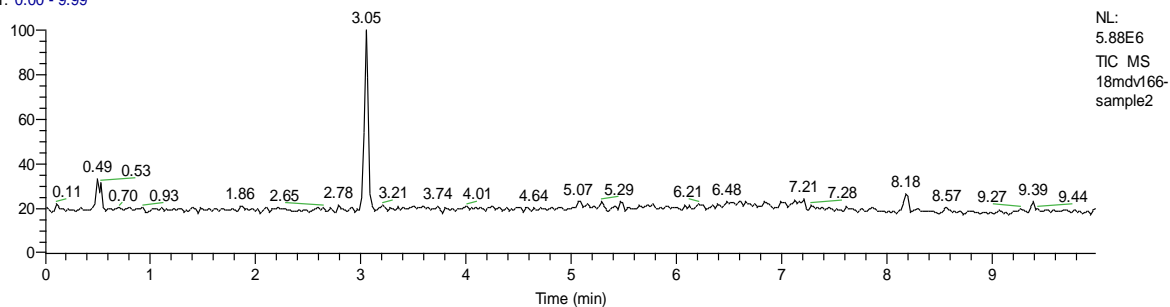

18mdv166-sample2 #135 RT: 3.05 AV: 1 NL: 1.99E6  
T: FTMS + p ESI Full ms [150.00-750.00]

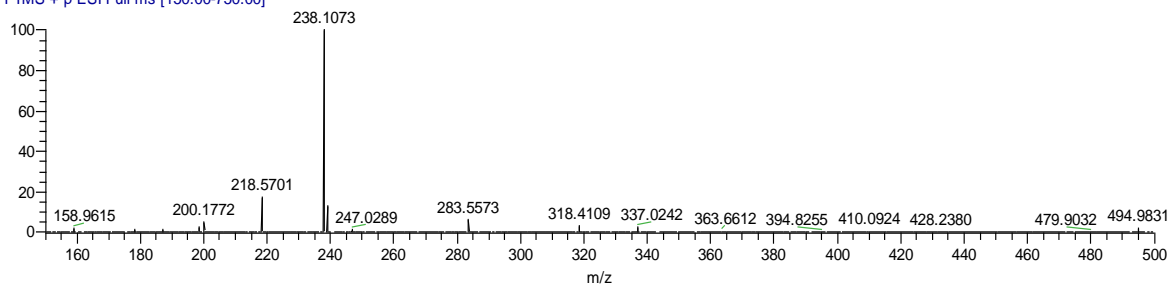

Figure S43. LC-HRMS spectrum of enzymatic product (S)-3a.

C:\Xcalibur...\18mdv166-sample4

6/8/2018 2:41:31 PM

RT: 0.00 - 9.98

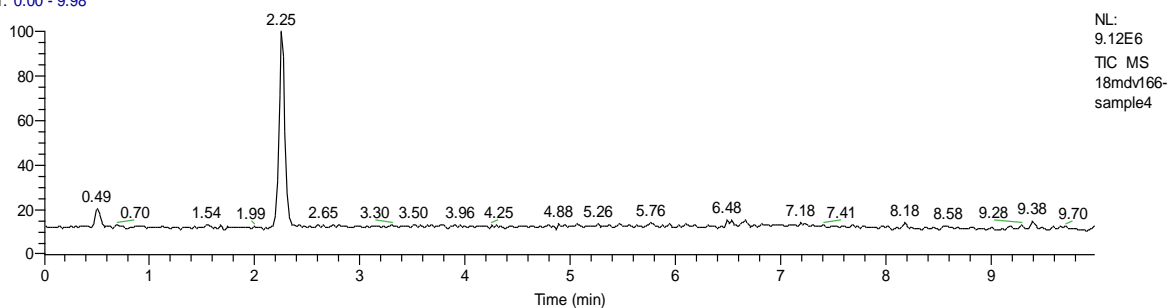

18mdv166-sample4 #99 RT: 2.24 AV: 1 NL: 3.13E6  
T: FTMS + p ESI Full ms [150.00-750.00]

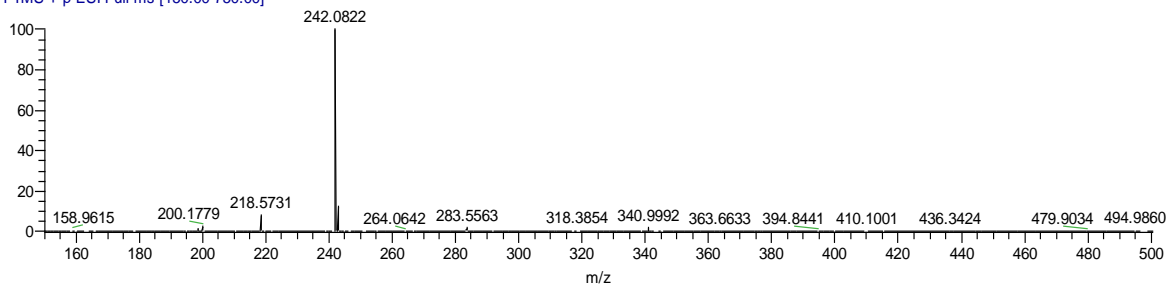

Figure S44. LC-HRMS spectrum of enzymatic product (S)-3c.

18mdv169-MW257\_180611150801

6/11/2018 3:08:01 PM

RT: 0.00 - 10.00

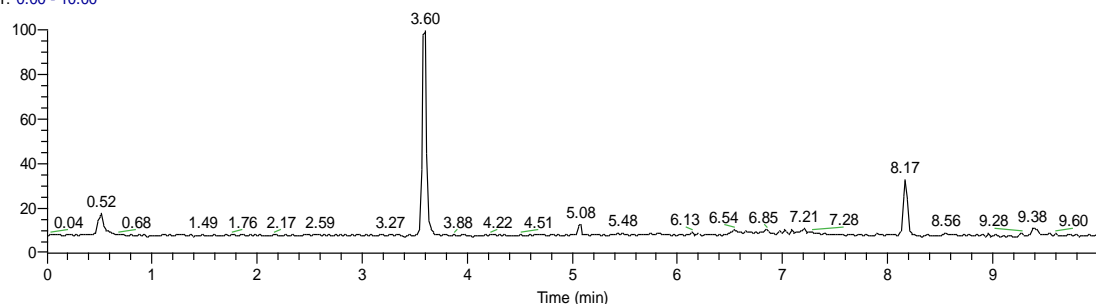

18mdv169-MW257\_180611150801 #158 RT: 3.56 AV: 1 NL: 2.22E6

T: FTMS + p ESI Full ms [150.00-750.00]

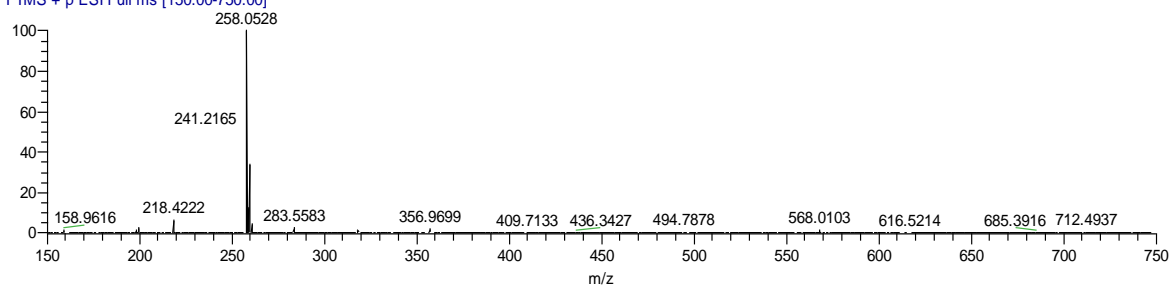

**Figure S45.** LC-HRMS spectrum of enzymatic product (*S*)-**3d**.

C:\Xcalibur...\18mdv166-sample7

6/8/2018 4:15:15 PM

RT: 0.00 - 9.98

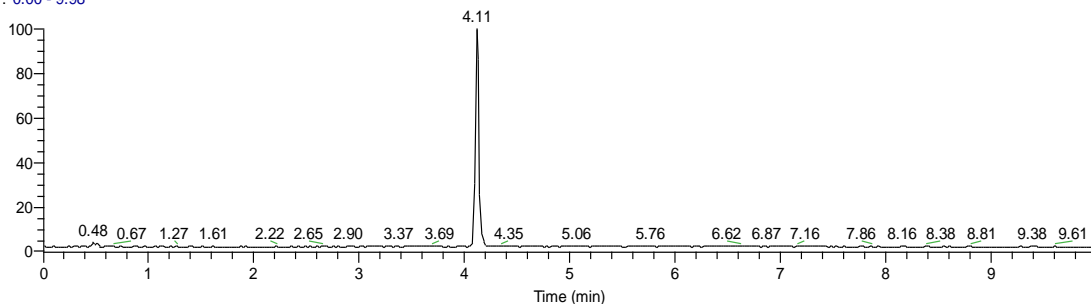

18mdv166-sample7 #176 RT: 4.07 AV: 1 NL: 8.21E5

T: FTMS + p ESI Full ms [150.00-750.00]

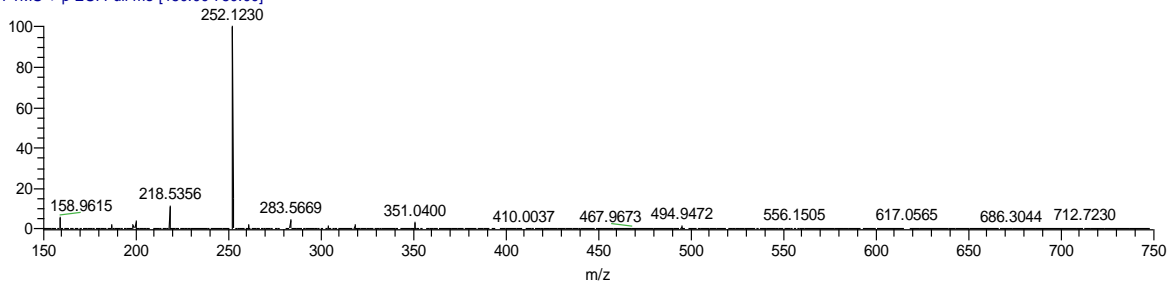

**Figure S46.** LC-HRMS spectrum of enzymatic product (*S*)-**3g**.

RT: 0.00 - 9.99

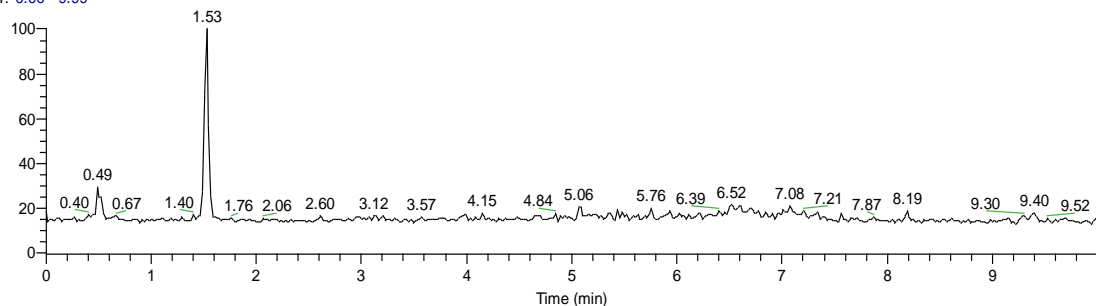

18mdv166-sample1 #67 RT: 1.53 AV: 1 SB: 2 1.40, 1.64 NL: 2.59E6  
T: FTMS + p ESI Full ms [150.00-750.00]

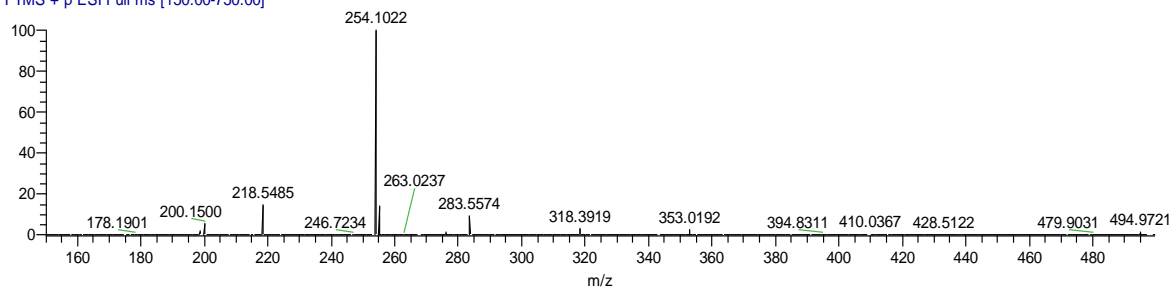

**Figure S47.** LC-HRMS spectrum of enzymatic product (S)-3h.

RT: 0.00 - 9.99

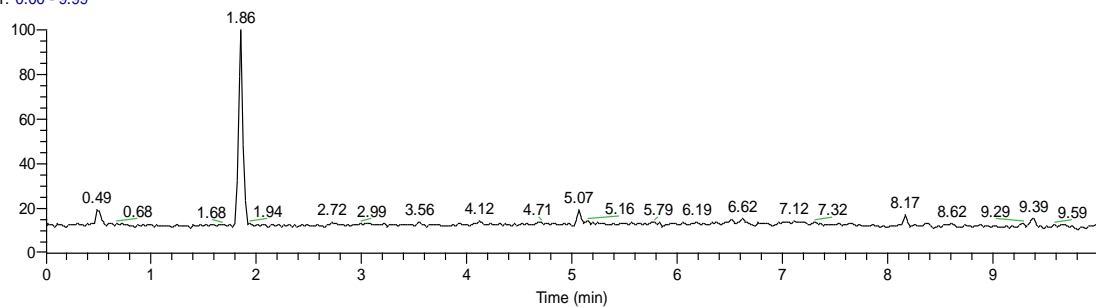

18mdv166-sample8 #77 RT: 1.82 AV: 1 NL: 1.25E6  
T: FTMS + p ESI Full ms [150.00-750.00]

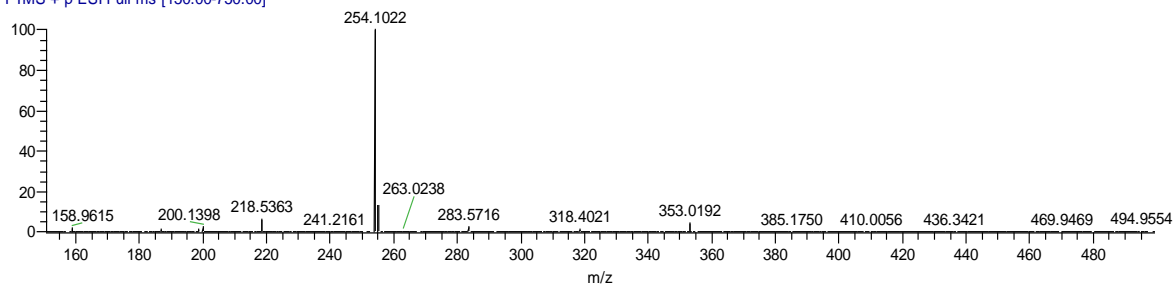

**Figure S48.** LC-HRMS spectrum of enzymatic product (S)-3i.



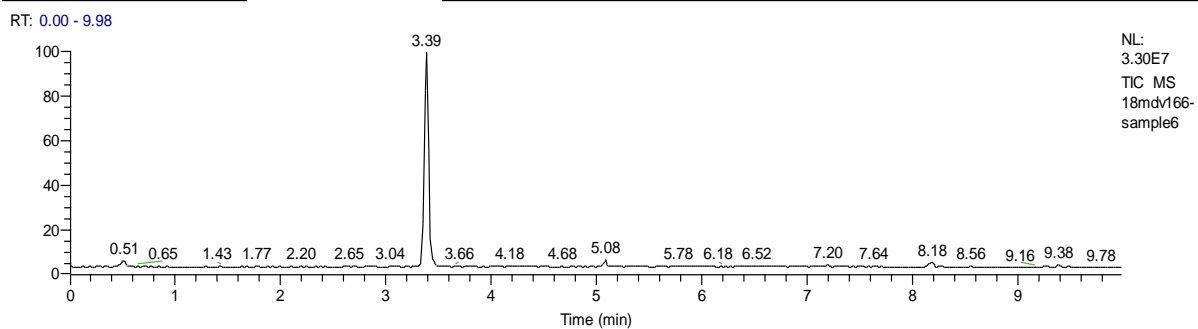

18mdv166-sample6 #149 RT: 3.37 AV: 1 NL: 1.25E7

T: FTMS + p ESI Full ms [150.00-750.00]

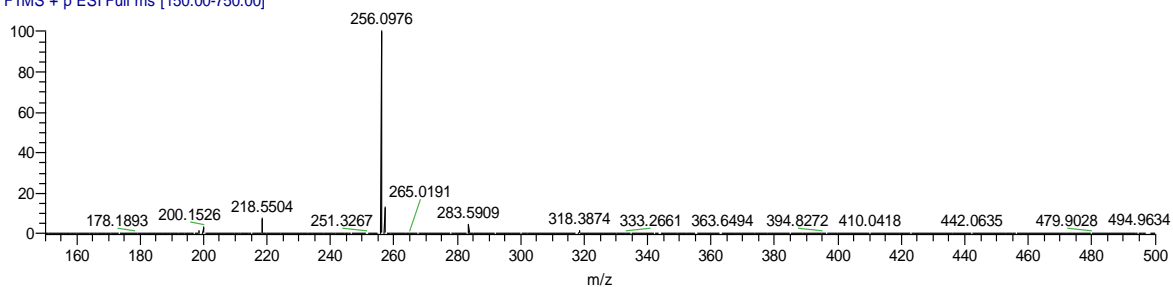**Figure S49.** LC-HRMS spectrum of enzymatic product (S)-3j.

## LC-HRMS data of chemically synthesized *N*-arylalkyl-substituted L- or D-aspartic acids

18062268-2D--- #123 RT: 2.45888 AV: 1 NL: 5.57E6  
T: FTMS + p ESI Full ms [200.00-600.00]

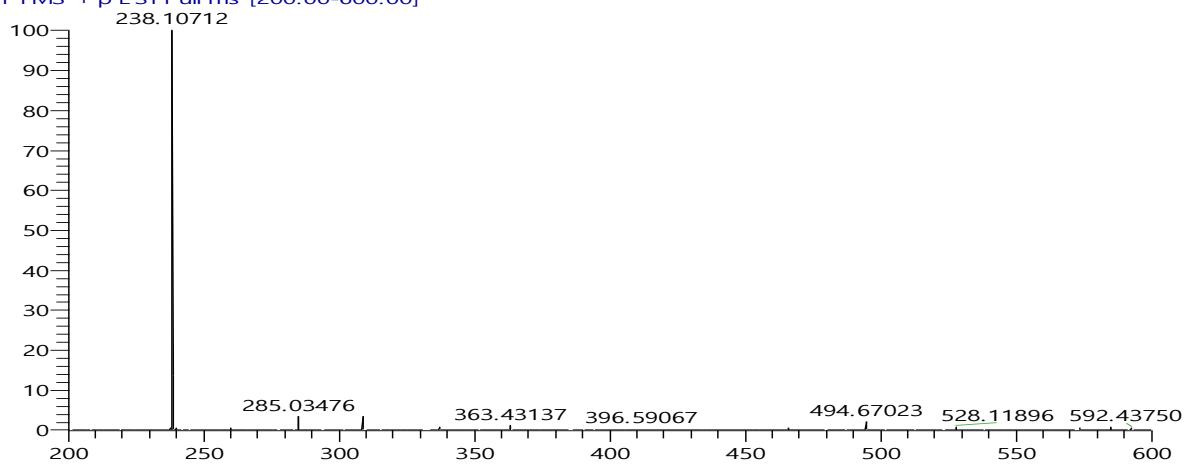

Figure S50. LC-HRMS spectrum of chemical reference (*R*)-3a.

18062268-2-L #96 RT: 1.91539 AV: 1 NL: 2.01E6  
T: FTMS + p ESI Full ms [200.00-600.00]

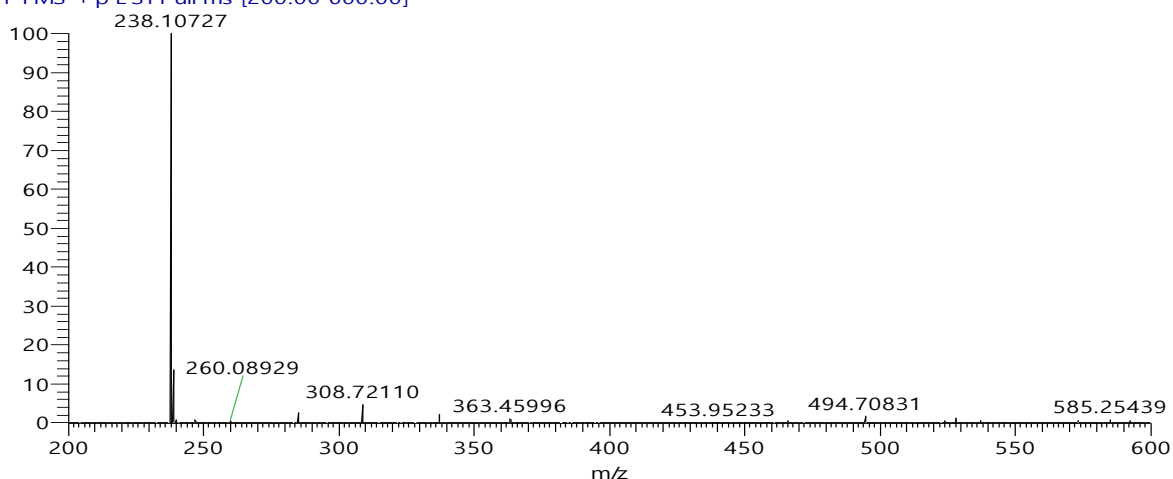

Figure S51. LC-HRMS spectrum of chemical reference (*S*)-3a.

18062268-5D #62 RT: 1.20953 AV: 1 NL: 6.28E6  
T: FTMS + p ESI Full ms [200.00-600.00]

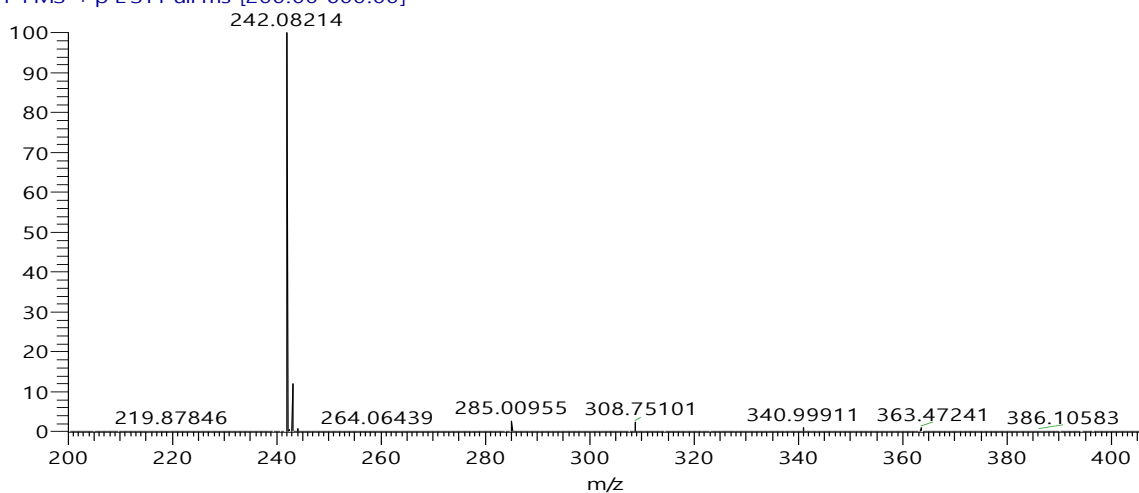

Figure S52. LC-HRMS spectrum of chemical reference (*R*)-3c.

18062268-5L #65 RT: 1.25822 AV: 1 NL: 1.68E6  
T: FTMS + p ESI Full ms [200.00-600.00]

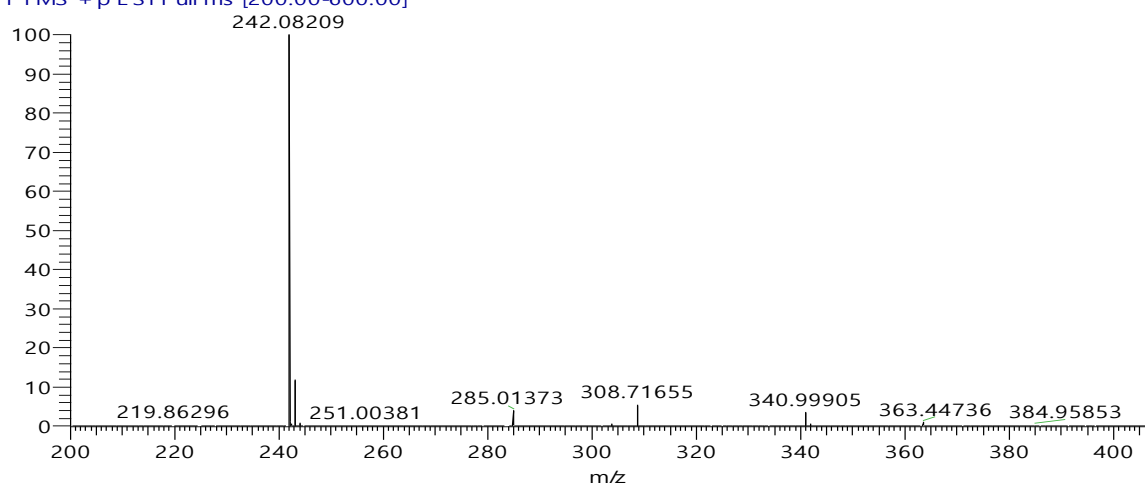

**Figure S53.** LC-HRMS spectrum of chemical reference (*S*)-3c.

18062268-4D #131 RT: 2.62462 AV: 1 NL: 1.29E6  
T: FTMS + p ESI Full ms [200.00-600.00]

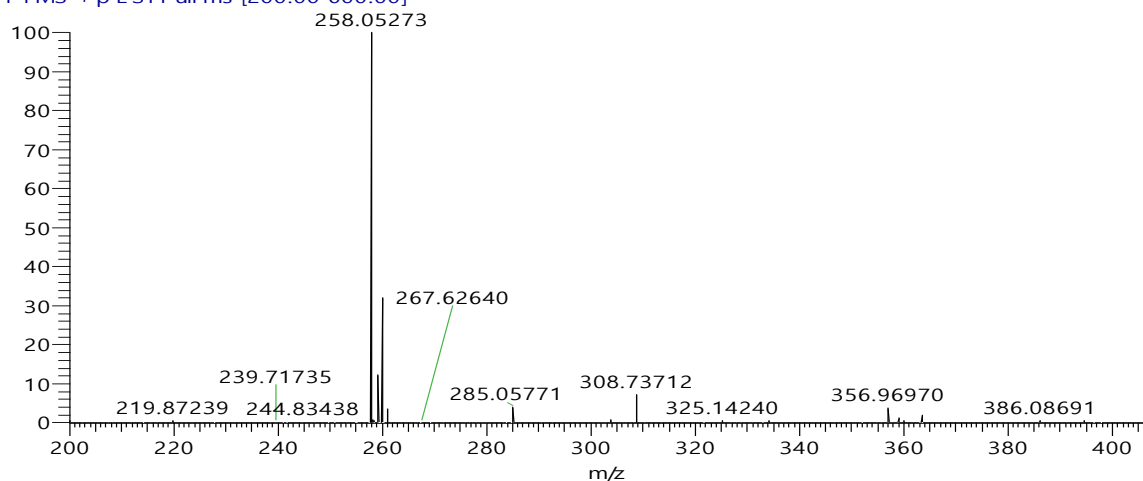

**Figure S54.** LC-HRMS spectrum of chemical reference (*R*)-3d.

18062268-4L #132 RT: 2.62451 AV: 1 NL: 1.09E7  
T: FTMS + p ESI Full ms [200.00-600.00]

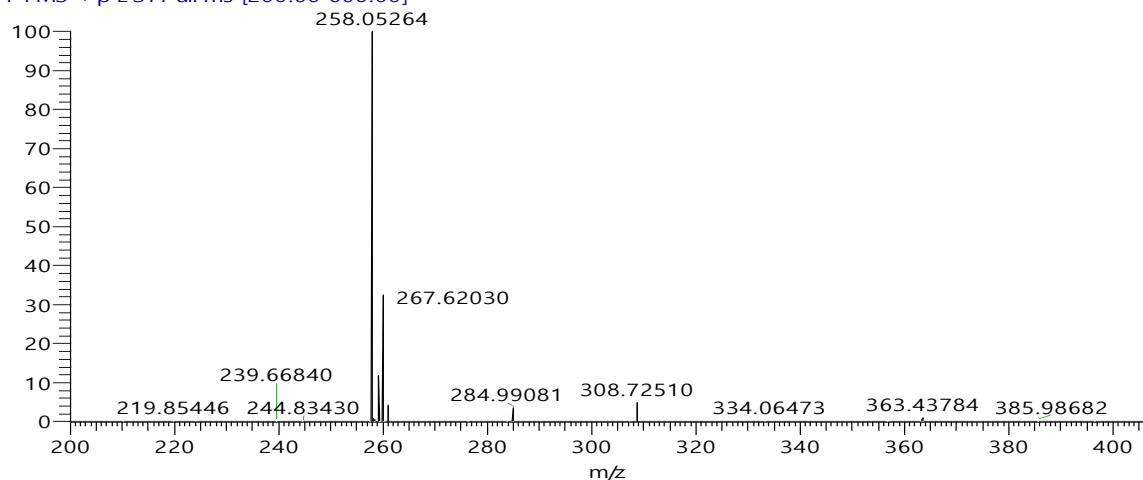

**Figure S55.** LC-HRMS spectrum of chemical reference (*S*)-3d.

18062268-8-D #157 RT: 3.14984 AV: 1 NL: 3.97E5  
T: FTMS + p ESI Full ms [200.00-600.00]

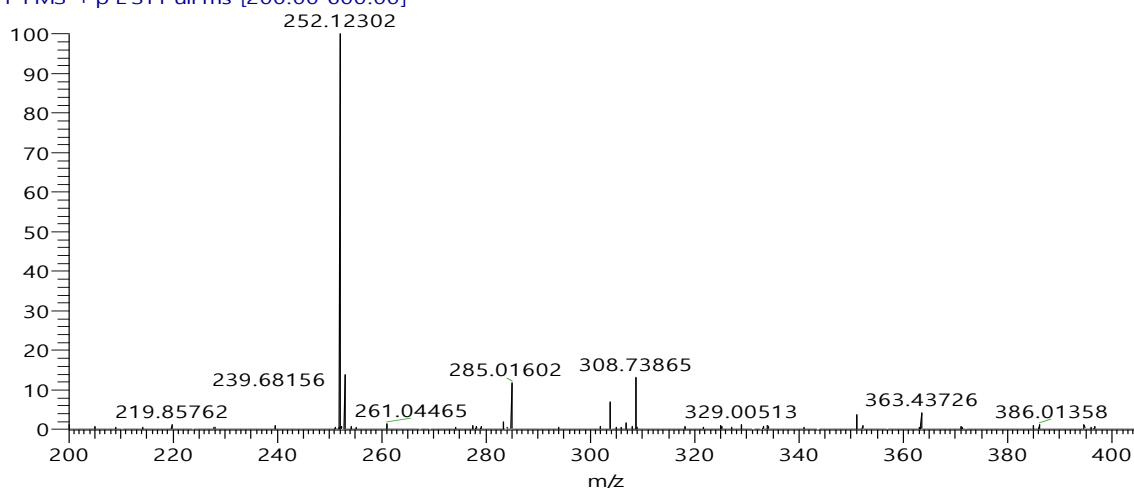

**Figure S56.** LC-HRMS spectrum of chemical reference (*R*)-3g.

18062268-8-L #154 RT: 3.10085 AV: 1 NL: 4.64E5  
T: FTMS + p ESI Full ms [200.00-600.00]

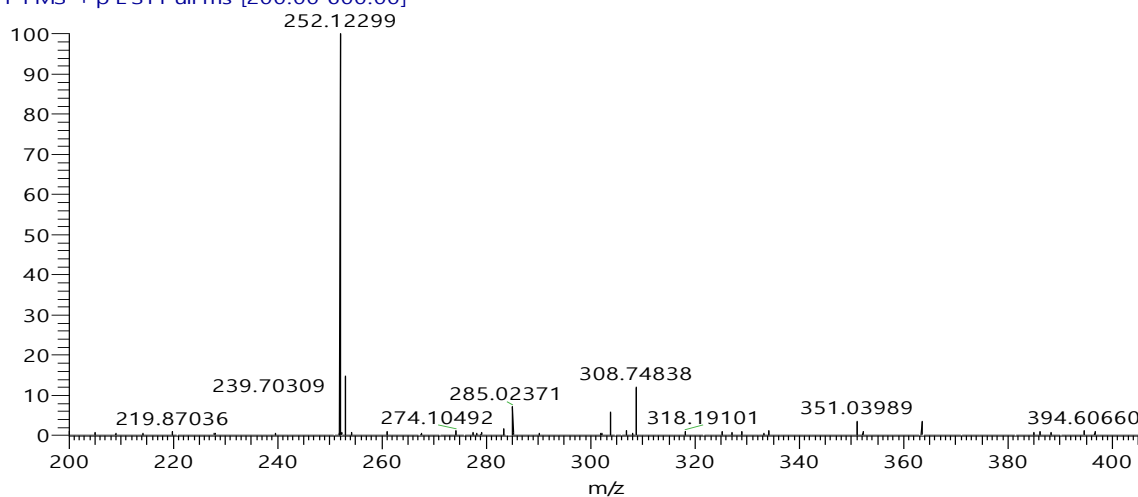

**Figure S57.** LC-HRMS spectrum of chemical reference (*S*)-3g.

18090303-1D #37 RT: 0.70551 AV: 1 SB: 19 0.82385-0.92567, 1.00711-1.25144 NL: 3.89E6  
T: FTMS + p ESI Full ms [200.00-600.00]

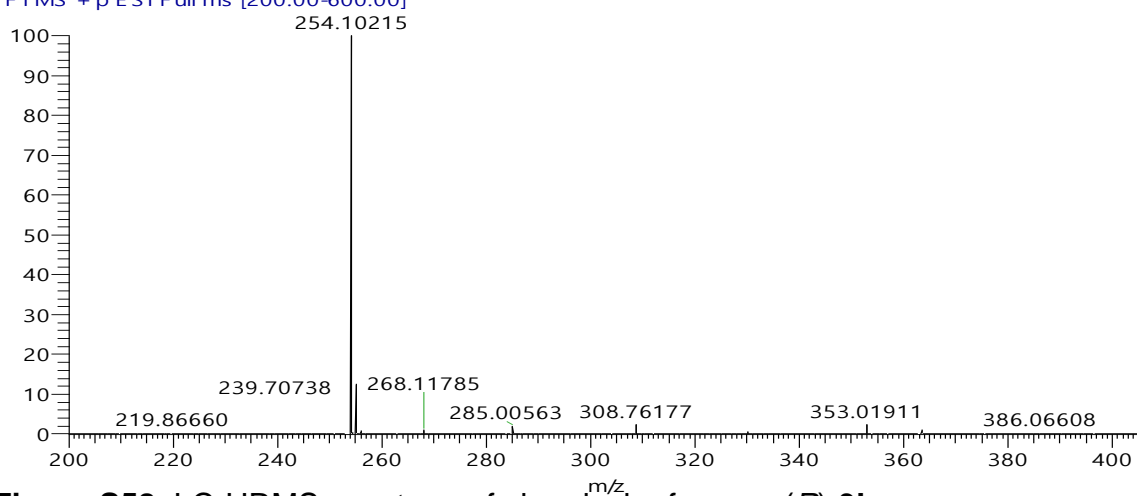

**Figure S58.** LC-HRMS spectrum of chemical reference (*R*)-3h.

18090303-1L #37 RT: 0.71047 AV: 1 NL: 2.27E 6  
T: FTMS + p ESI Full ms [200.00-600.00]

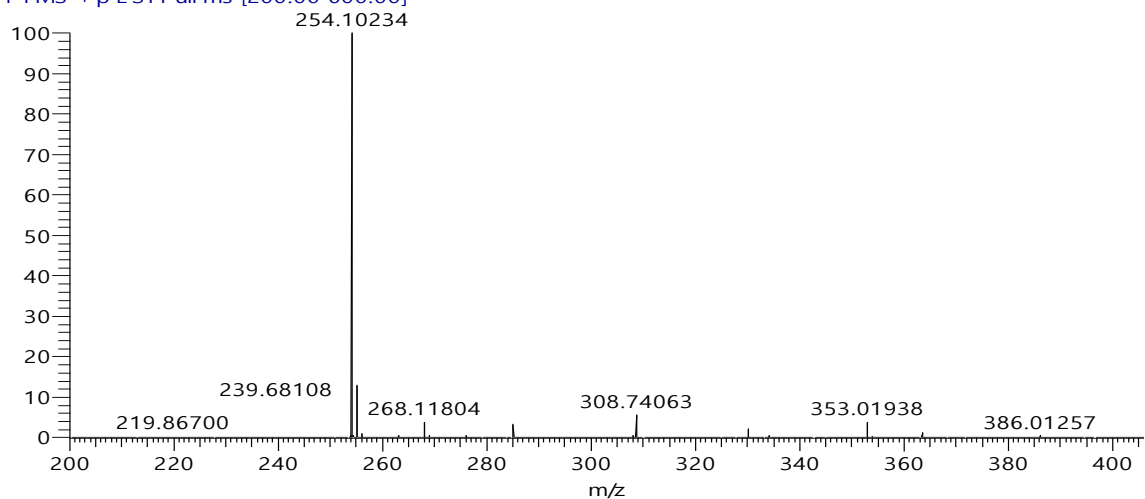

**Figure S59.** LC-HRMS spectrum of chemical reference (*S*)-3h.

18090404-9D #45 RT: 0.87690 AV: 1 NL: 3.70E 6  
T: FTMS + p ESI Full ms [200.00-600.00]

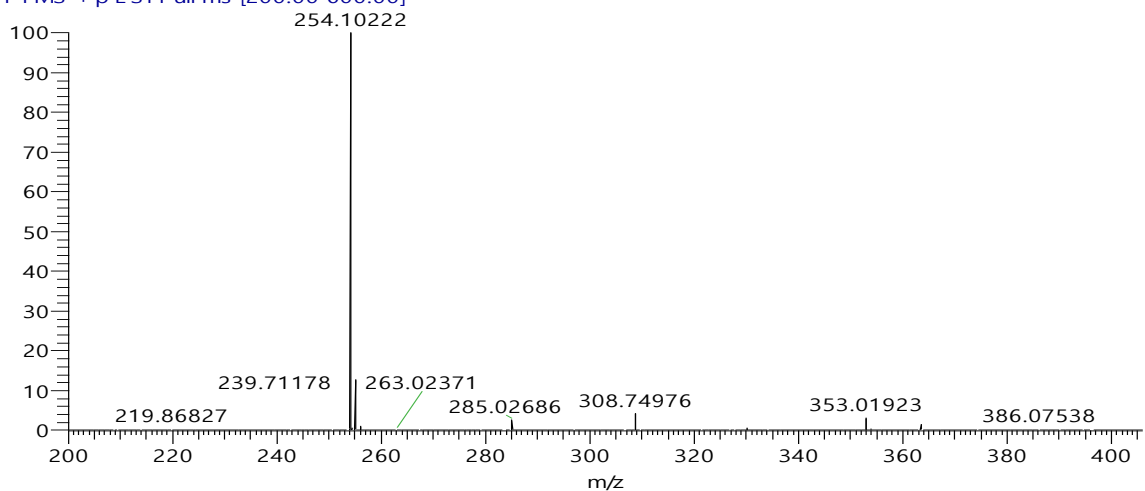

**Figure S60.** LC-HRMS spectrum of chemical reference (*R*)-3i.

18090404-9L #47 RT: 0.90636 AV: 1 NL: 5.42E 6  
T: FTMS + p ESI Full ms [200.00-600.00]

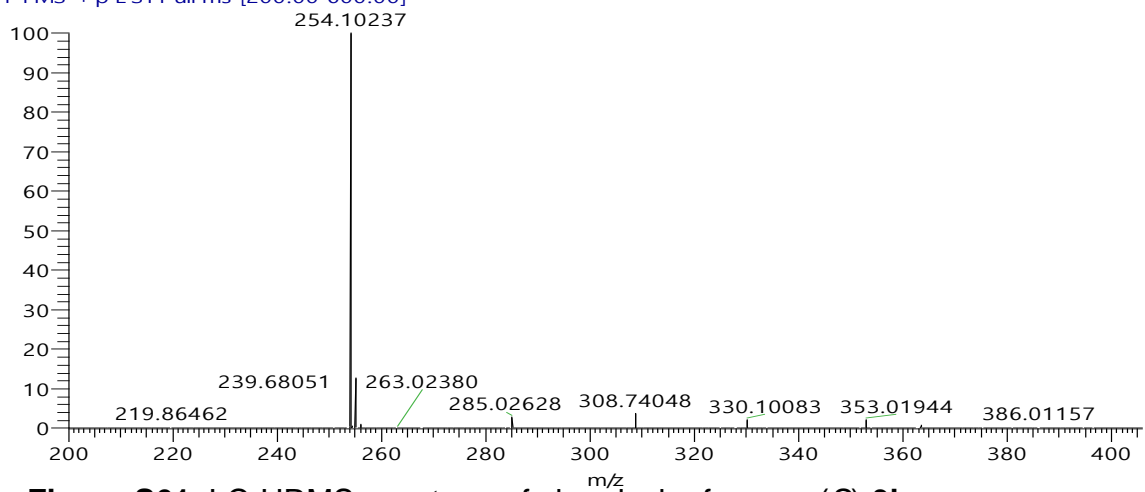

**Figure S61.** LC-HRMS spectrum of chemical reference (*S*)-3i.

18062268-7-D #127 RT: 2.50934 AV: 1 NL: 6.61E5  
T: FTMS + p ESI Full ms [200.00-600.00]

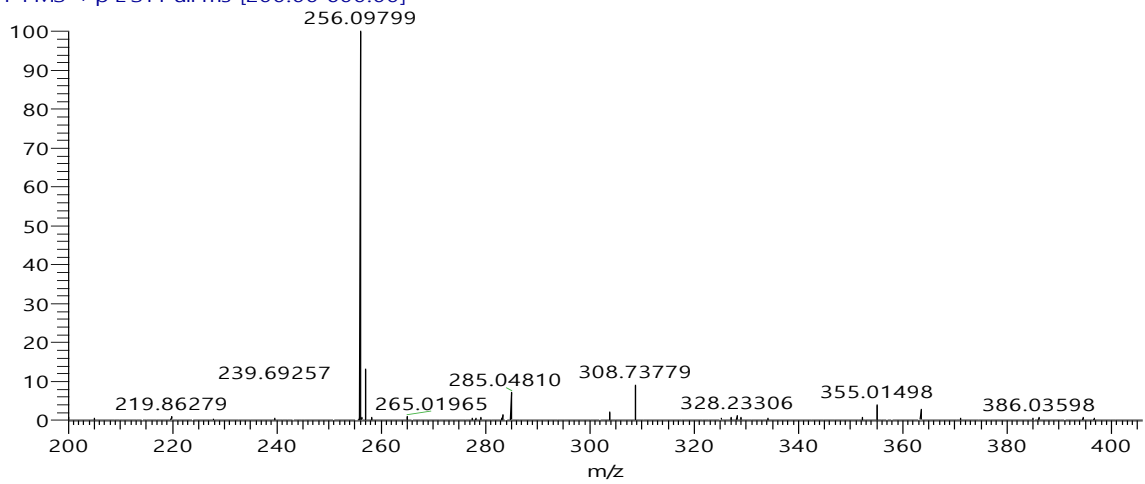

**Figure S62.** LC-HRMS spectrum of chemical reference (*R*)-3j.

18062268-7-L #113 RT: 2.26437 AV: 1 NL: 5.23E5  
T: FTMS + p ESI Full ms [200.00-600.00]

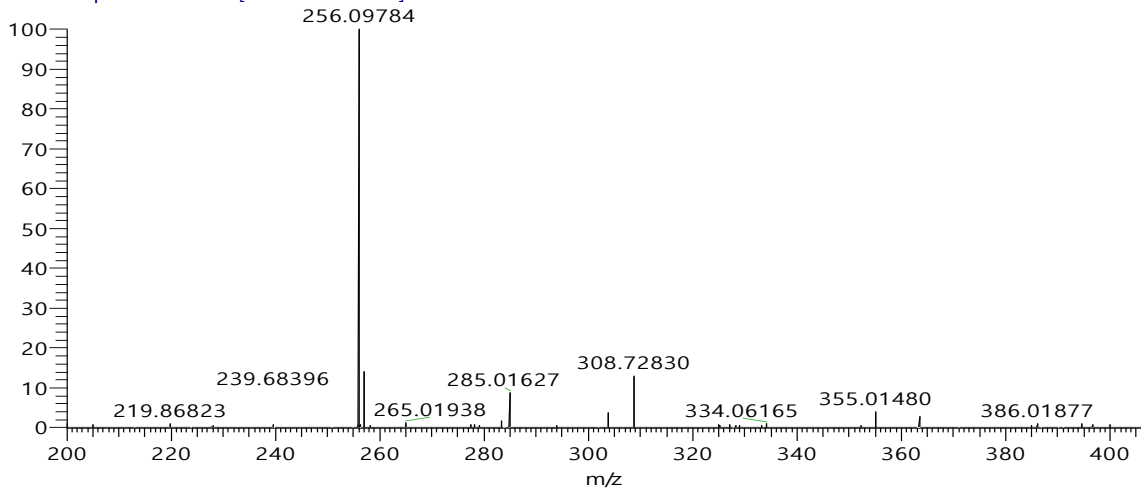

**Figure S63.** LC-HRMS spectrum of chemical reference (*S*)-3j.

## 5. Chiral HPLC analysis

Chiral HPLC analysis was performed on a Nucleosil 5 $\mu$  chiral-1 120A (250 x 4.6 mm) column, using isocratic 0.5 mM CuSO<sub>4</sub> at 1 ml/min at 60°C, detection at 240 nm. A racemic mixture was prepared by mixing chemically synthesized *N*-arylalkyl-substituted L- and D-aspartic acids in a 1:1 ratio.

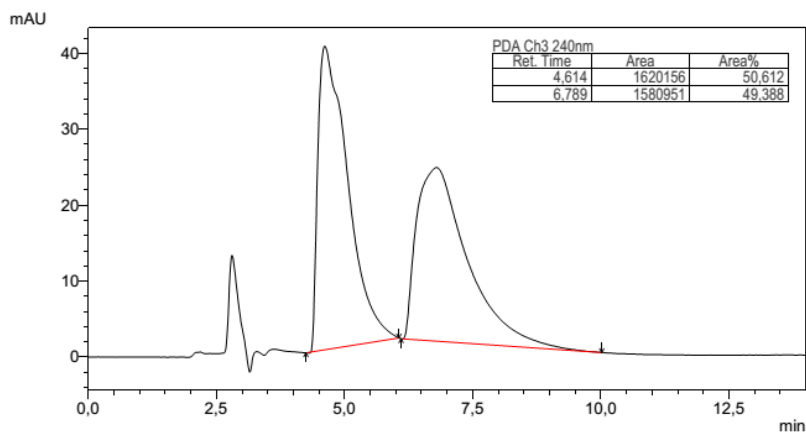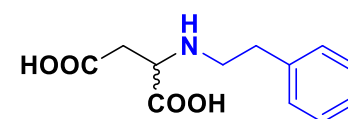

(*rac*)-**3a**

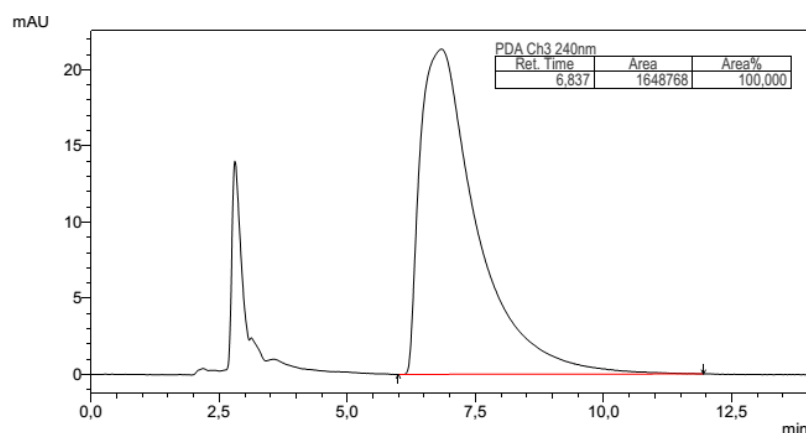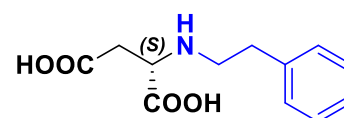

authentic standard (*S*)-**3a**

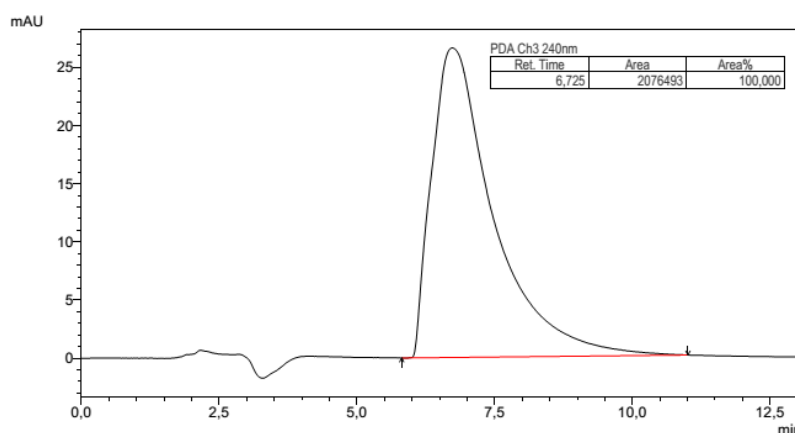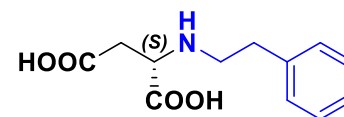

enzymatic product (*S*)-**3a**

**Figure S64.** Chiral HPLC analysis of product **3a**.

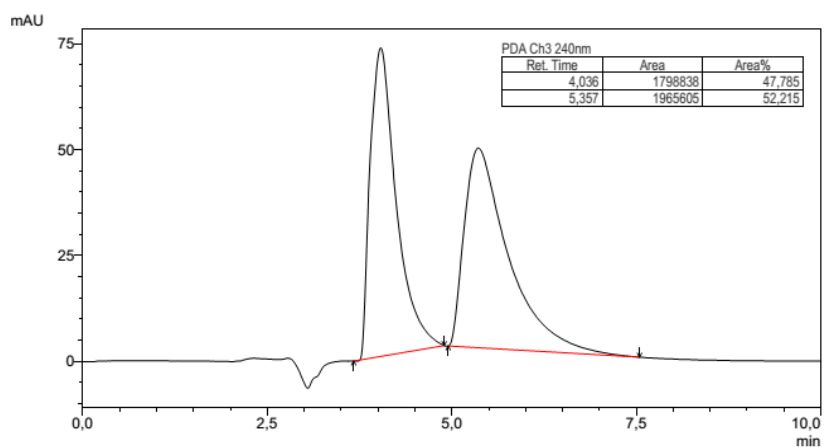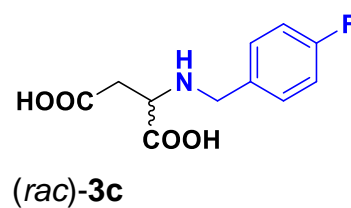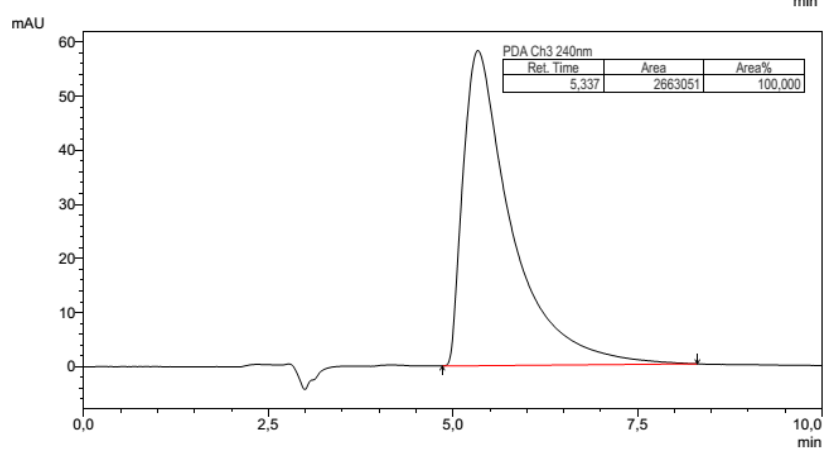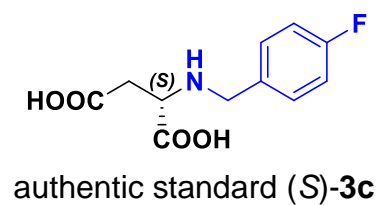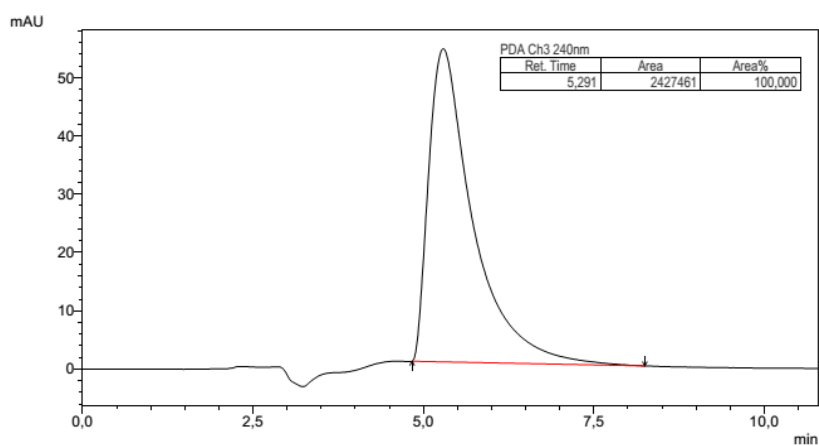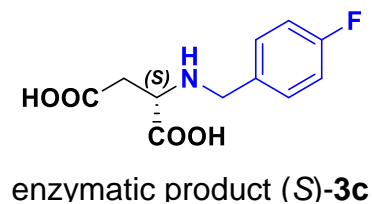

**Figure S65.** Chiral HPLC analysis of product **3c**.



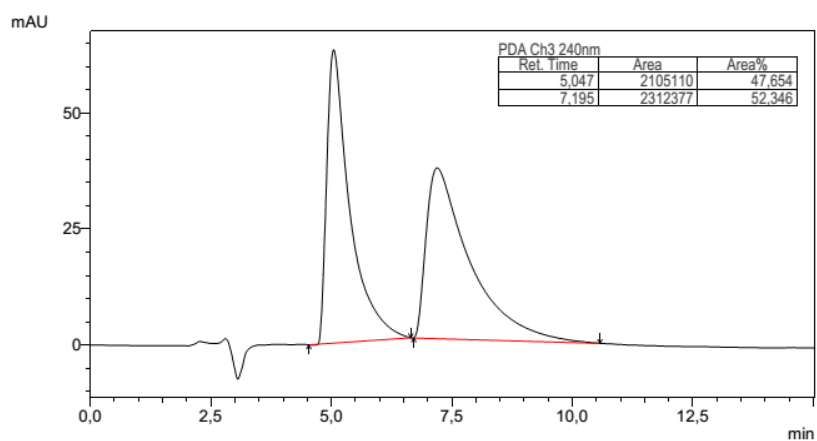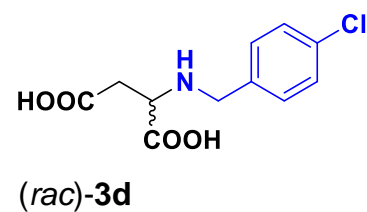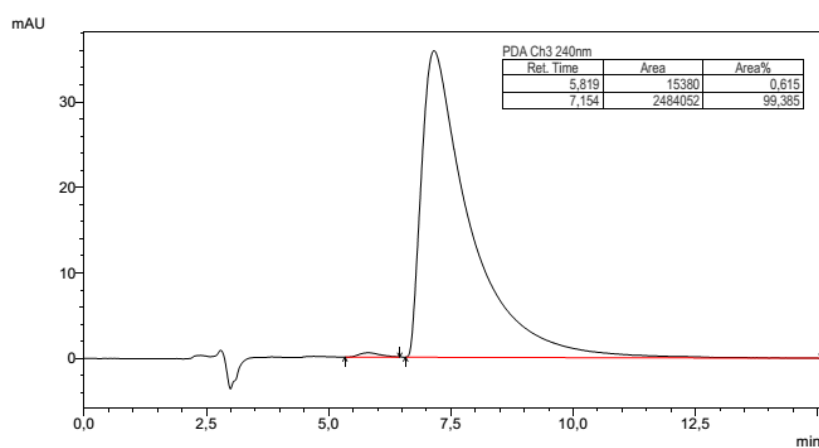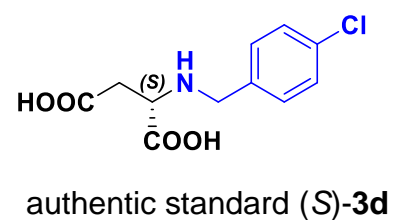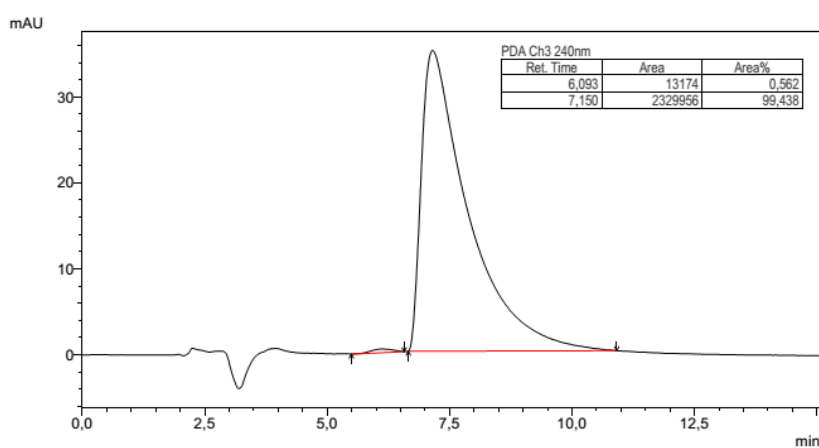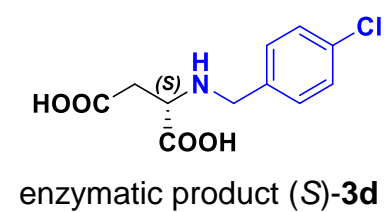

**Figure S66.** Chiral HPLC analysis of product 3d.

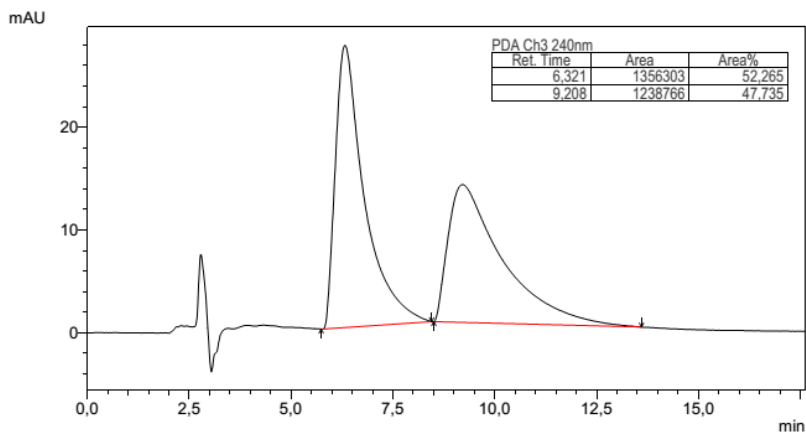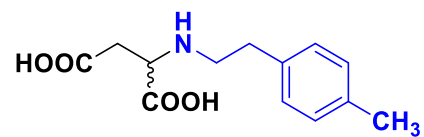

(rac)-3g

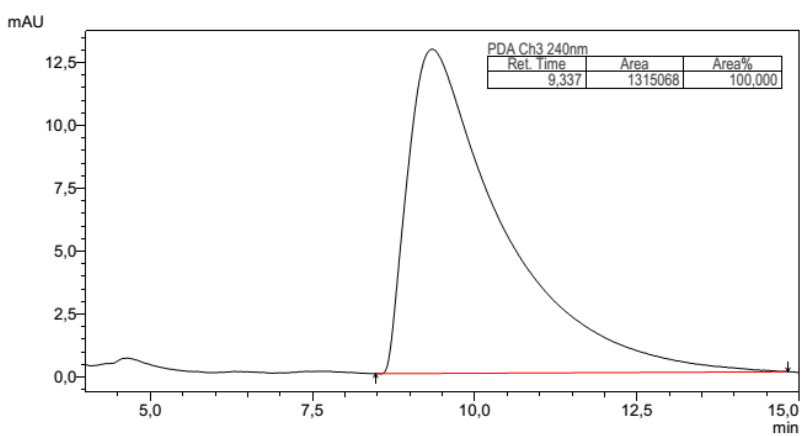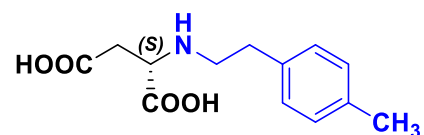

authentic standard (S)-3g

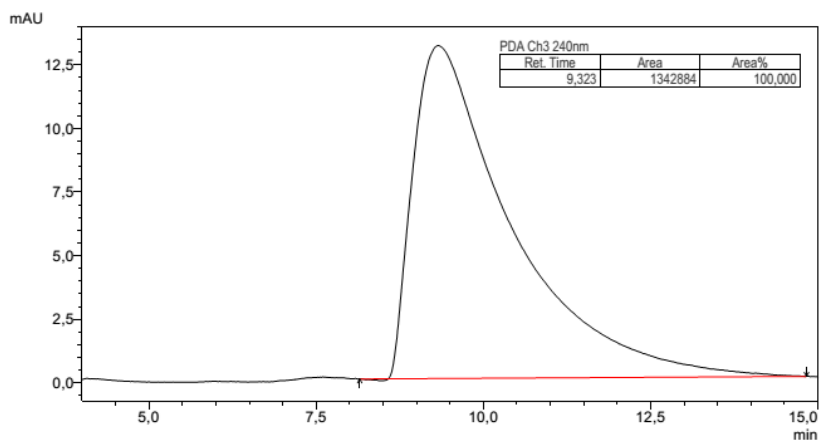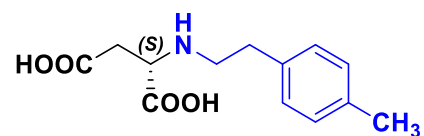

enzymatic product (S)-3g

Figure S67. Chiral HPLC analysis of product 3g.

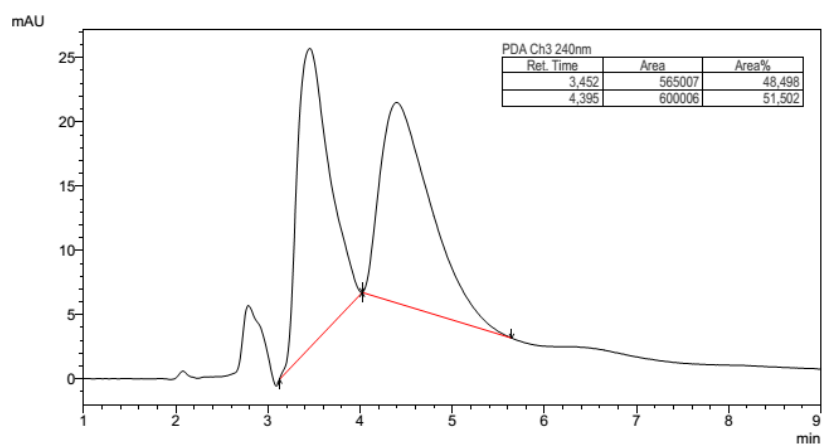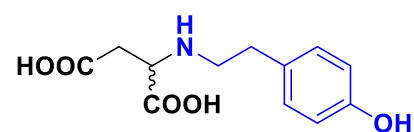

(rac)-3h

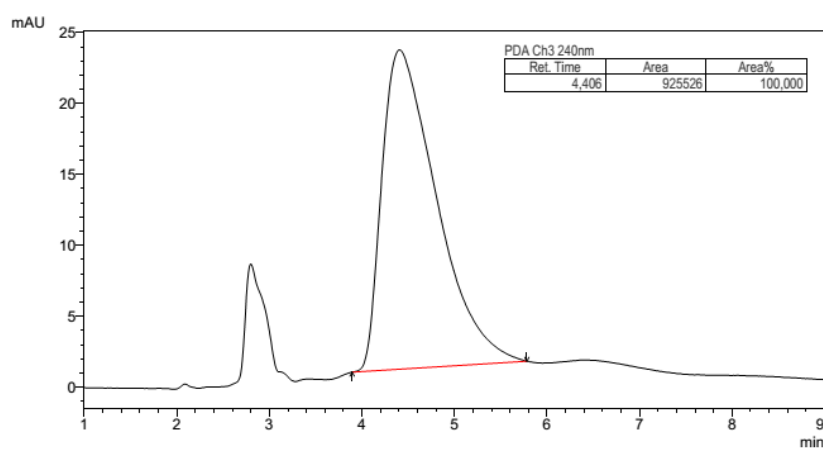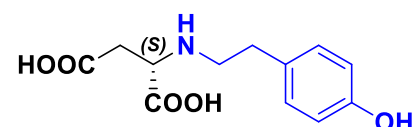

authentic standard (S)-3h

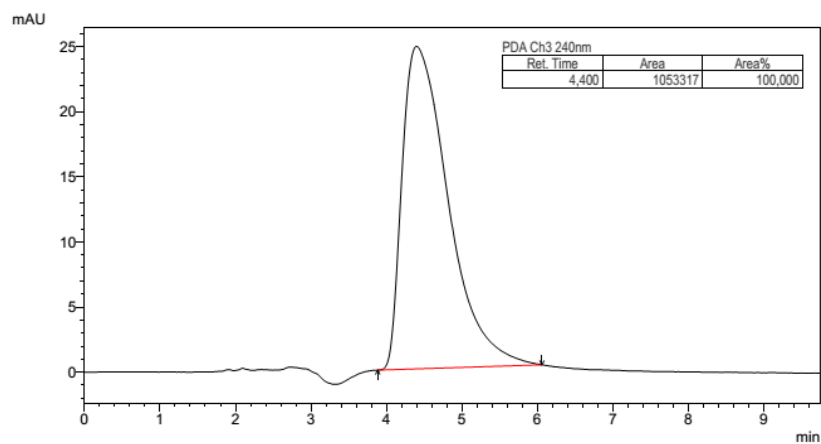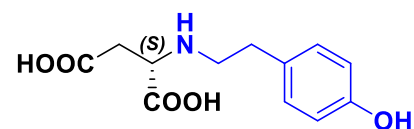

enzymatic product (S)-3h

**Figure S68.** Chiral HPLC analysis of product 3h.

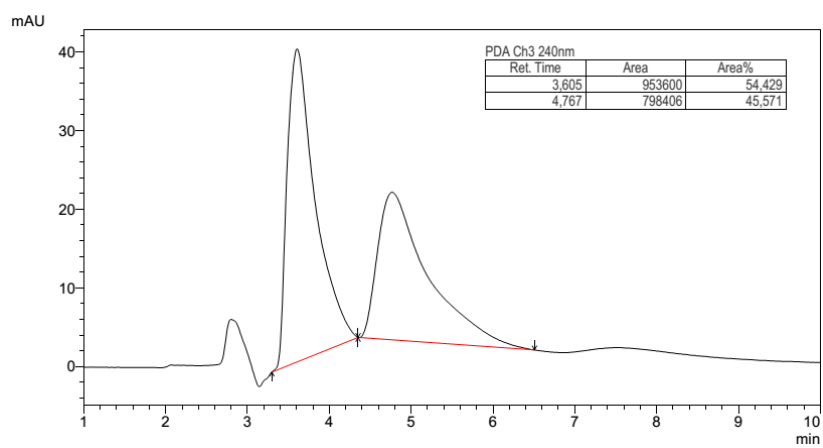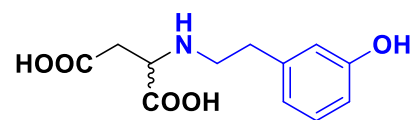

(rac)-**3i**

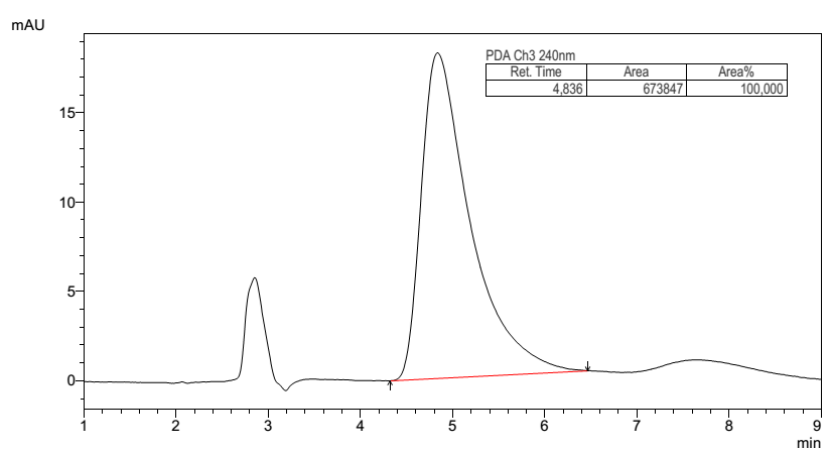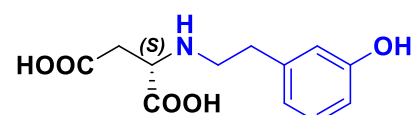

authentic standard (S)-**3i**

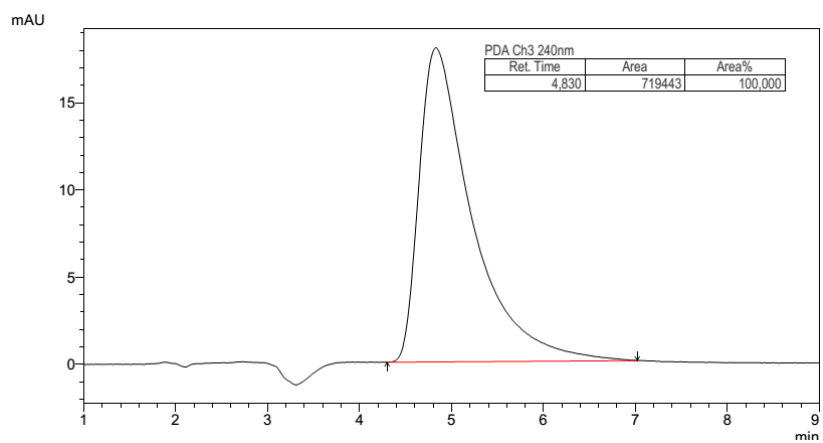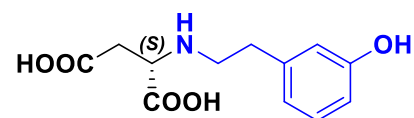

enzymatic product (S)-**3i**

**Figure S69.** Chiral HPLC analysis of product **3i**.

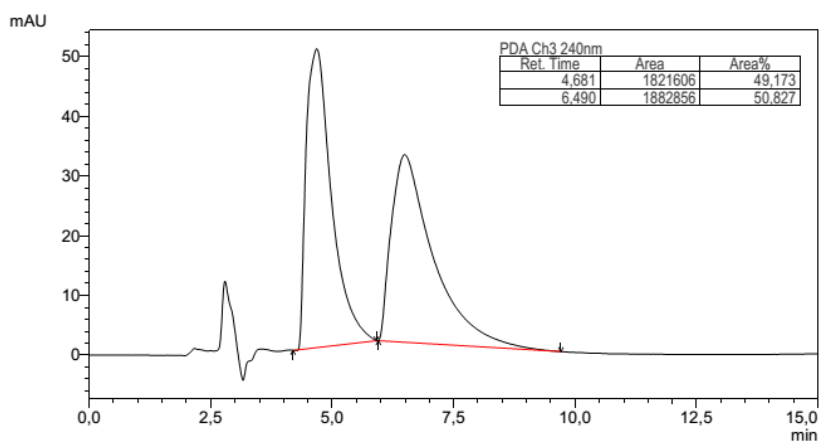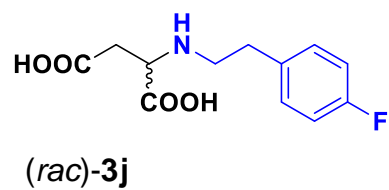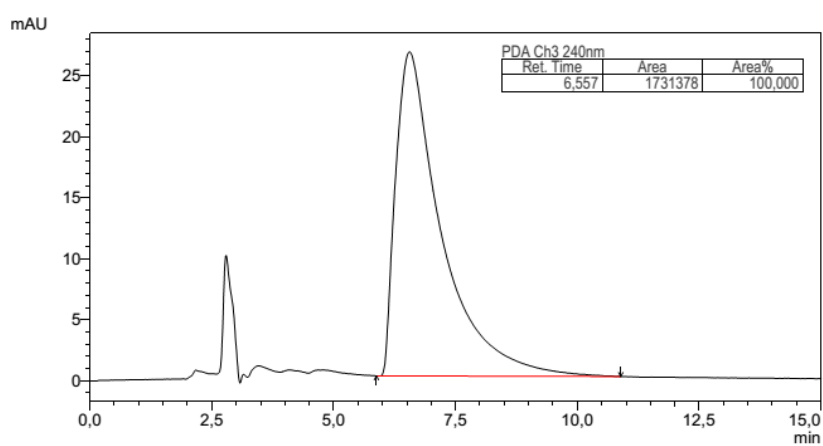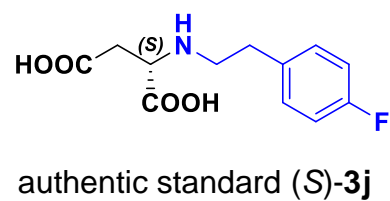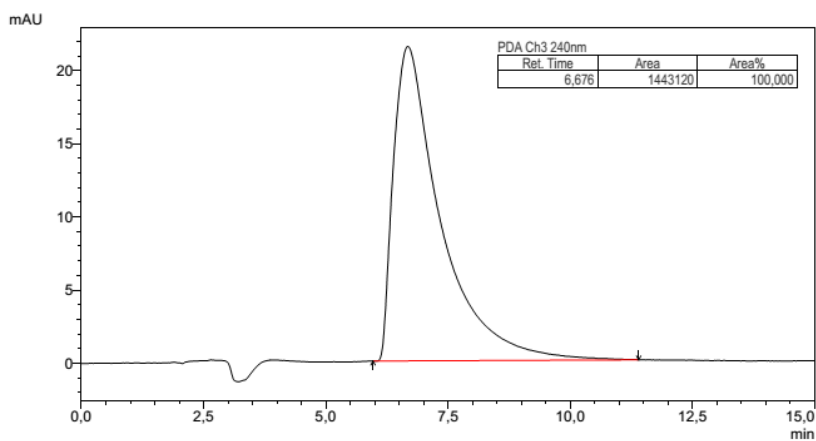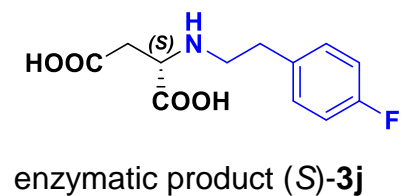

**Figure S70.** Chiral HPLC analysis of product **3j**.

## 6. Additional figures

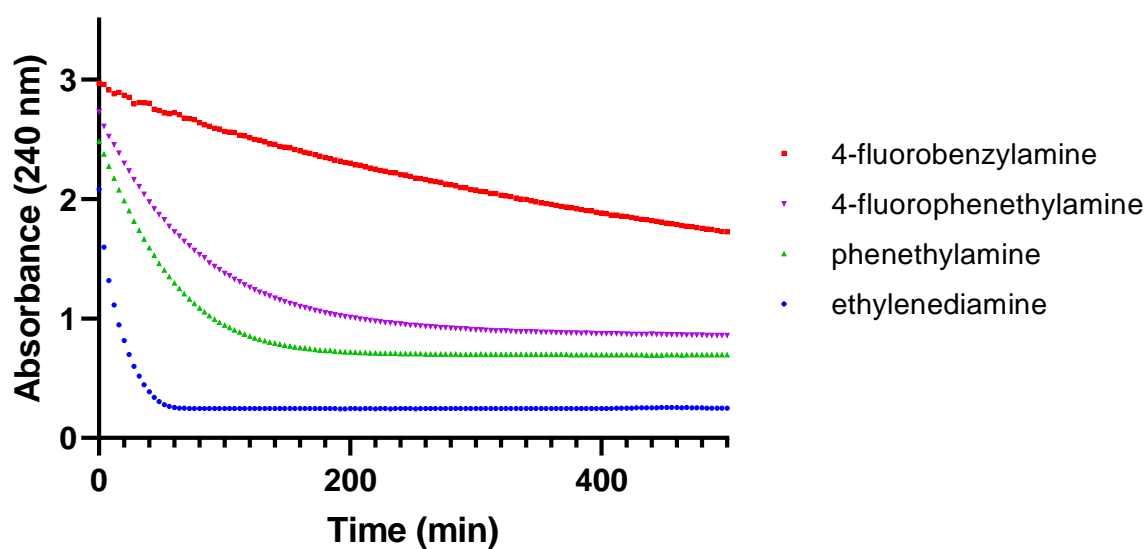

**Figure S71.** Progress curves for the EDDS-lyase (15  $\mu$ M, 0.15 mol%) catalyzed addition of 4-fluorobenzylamine (**2c**, 50 mM), 4-fluorophenethylamine (**2j**, 50 mM), phenethylamine (**2a**, 50 mM) or ethylenediamine (50 mM) to fumarate (**1**, 10 mM) in 20 mM  $\text{NaH}_2\text{PO}_4$ -NaOH buffer (pH 8.5), as monitored by UV spectroscopy.

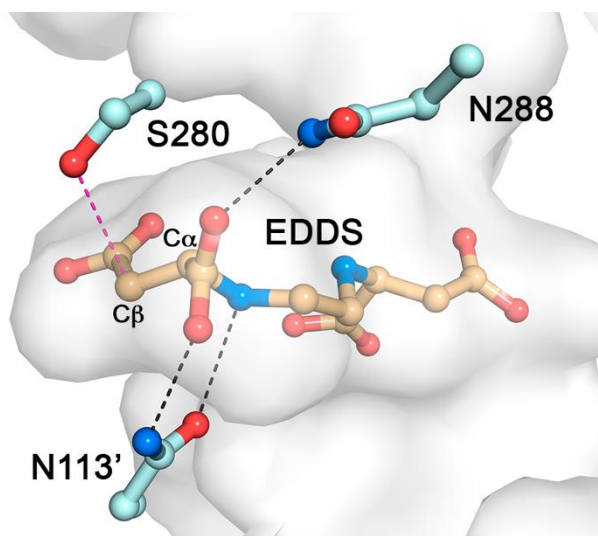

**Figure S72.** Binding mode of (*S,S*)-EDDS in the active site pocket of EDDS lyase, as based on the EDDS lyase crystal structure (PDB entry 6G3H).<sup>5</sup> Selected hydrogen bonds are shown with black dashed lines. The dashed line in magenta indicates the contact of Ser280 (the catalytic base) with the C $\beta$  carbon of the proximal aspartyl moiety. Asn113' (the apostrophe indicates that this residue belongs to a different polypeptide chain in the EDDS lyase tetramer) forms stabilizing hydrogen bonds with both the  $\alpha$ -amino and  $\alpha$ -carboxylate group of the proximal aspartyl moiety. The relative positions of Ser280 and Asn113' at opposite sides of the aspartyl-moiety are a key feature that govern the enantioselectivity of the reaction catalyzed by EDDS lyase. This figure was generated with PyMOL version 2.4.2 (Schrödinger, LLC).

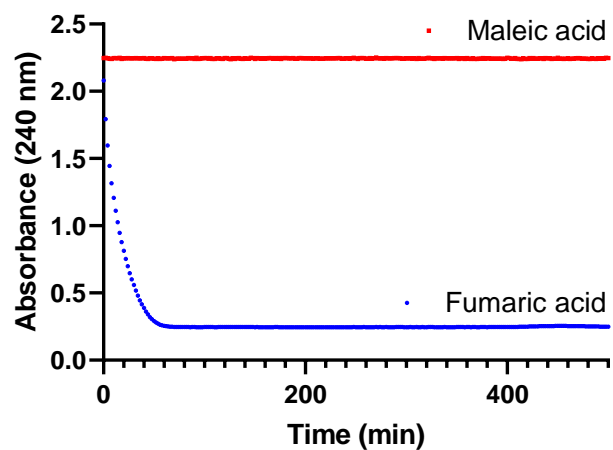

**Figure S73.** Progress curves for the EDDS-lyase (15  $\mu$ M, 0.15 mol%) catalyzed addition of ethylenediamine (50 mM) to maleic acid (10 mM) or fumaric acid (10 mM) in 20 mM  $\text{NaH}_2\text{PO}_4$ -NaOH buffer (pH 8.5), as monitored by UV spectroscopy.



## 7. Supplementary references

- 1 V. Puthan Veetil, H. Raj, M. de Villiers, P. G. Tepper, F. J. Dekker, W. J. Quax and G. J. Poelarends, *ChemCatChem*, 2013, **5**, 1325–1327.
- 2 H. Raj, B. Weiner, V. Puthan Veetil, C. R. Reis, W. J. Quax, D. B. Janssen, B. L. Feringa and G. J. Poelarends, *ChemBioChem*, 2009, **10**, 2236–2245.
- 3 Y. Ohfuné, N. Kurokawa, N. Higuchi, M. Saito, M. Hashimoto and T. Tanaka, *Chem. Lett.*, 1984, **13**, 441–444.
- 4 B. R. Lichman, E. D. Lamming, T. Pesnot, J. M. Smith, H. C. Hailes and J. M. Ward, *Green Chem.*, 2015, **17**, 852–855.
- 5 H. Poddar, J. de Villiers, J. Zhang, V. Puthan Veetil, H. Raj, A.-M. W. H. Thunnissen and G. J. Poelarends, *Biochemistry*, 2018, **57**, 3752–3763.
